# Supplementary material
Source: Royal Society of Chemistry journal article supplement (doi:10.1039/d6qo00531d)

## Supporting information

# Enantioselective Copper-Catalyzed Synthesis of Axially Chiral Deuterated Biaryl Ethers and Phenols from Cyclic Iodonium Salts

Wei-Yuan Ma, Maorui Zhu, Zenghui Ye, Xi Zhang, Jian-Xing Xu\*, Fengzhi Zhang\*  
School of Pharmacy, Hangzhou Medical College, Hangzhou, Zhejiang 310000, China.

## Table of Contents

|                                                                                                                                       |     |
|---------------------------------------------------------------------------------------------------------------------------------------|-----|
| 1. General information.....                                                                                                           | s2  |
| 2. Optimization of Reaction Parameters.....                                                                                           | s3  |
| 3. Enantioselective Copper-Catalyzed Synthesis of Axially Chiral Deuterated Biaryl Ethers and Phenols from Cyclic Iodonium Salts..... | s4  |
| 4. Gram-scale reaction and Control experiment.....                                                                                    | s25 |
| 5. Further Applications.....                                                                                                          | s27 |
| 6. References.....                                                                                                                    | s3  |
| 1                                                                                                                                     |     |
| 7. Copies of NMR Spectra.....                                                                                                         | s32 |

## 1. General Information

Copper catalysts were purchased from Acros, Aldrich, and Strem. Other chemicals were purchased from Bidepharm, Adamas, and Energy chemicals, and were directly used without further purifications. Yields for all compounds were determined by the column chromatography which was generally performed on silica gel (200-300 mesh) using petroleum ether (PE)/EtOAc as eluent, and reactions were monitored by thin layer chromatography (TLC) on a glass plate coated with silica gel with fluorescent indicator (GF254) using UV light and iodine chromogenic method.  $^1\text{H}$  and  $^{13}\text{C}$  NMR spectra were collected on a Zhong Ke Oxford Quantum-I Plus 400 MHz at room temperature.  $^1\text{H}$  NMR spectra were reported in parts per million (ppm) downfield of tetramethylsilane (TMS) and were referenced to the signal of TMS (0 ppm).  $^{13}\text{C}$  NMR spectra were reported in ppm relative to residual  $\text{CHCl}_3$  (77.00 ppm). Coupling constants,  $J$ , are reported in hertz (Hz). HRMS was performed on Bruker Apex II FT-ICR mass instrument (ESI). The enantiomeric excess (ee) of the products was determined by chiral HPLC (Agilent iQ 1260-G6160) using Daicel CHIRALCEL® columns and Daicel CHIRALPAK® columns (internal diameter 4.6 mm, column length 250 mm, particle size 5  $\mu\text{m}$ ). Optical rotations were measured on an AUTOPOL IV Automatic polarimeter (Rudolph Research Analytical).

**L1-L10** were obtained from commercial suppliers (Daicel Chiraltech and BidePharm.) and used without further purification. Cyclic diaryliodonium salts **1** was prepared according to the reported procedures<sup>1</sup>.

## 2. Optimization of Reaction Parameters

### General Procedure

To a 5 mL reaction tube with a stir bar was charged with Catalyst (10 mol %, 0.01 mmol), L (11 mol%, 0.011 mmol) and cyclic diaryliodonium salts **1a** (45.6 mg, 0.1 mmol), The tube was sealed with rubber septum, then evacuated and backfilled with nitrogen for three cycles, CD<sub>3</sub>OD (0.05 mL, 2.0 M) was added. The reaction mixture was stirred at appreciate temperature for 6 h. The reaction mixture was quenched with water (10.0 mL), and extracted with ethyl acetate (3 × 15.0 mL). The combined organic layers were washed with water, brine, dried over anhydrous Na<sub>2</sub>SO<sub>4</sub>, and concentrated under reduced pressure. The residue was purified by flash chromatography on silica gel to afford the desired product **2a**.

**Table S1.** Effect of catalysts and ligands<sup>a</sup>

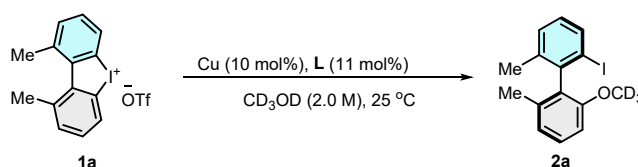

| entry     | Catalyst     | ligand     | yield (%) | ee (%)    |
|-----------|--------------|------------|-----------|-----------|
| 1         | CuI          | <b>L1</b>  | 88        | 3         |
| 2         | CuI          | <b>L2</b>  | 90        | 6         |
| 3         | CuI          | <b>L3</b>  | 90        | 27        |
| 4         | CuI          | <b>L4</b>  | 95        | 89        |
| 5         | CuI          | <b>L5</b>  | 89        | 60        |
| 6         | CuI          | <b>L6</b>  | 80        | 0         |
| 7         | CuI          | <b>L7</b>  | 86        | 6         |
| 8         | CuI          | <b>L8</b>  | 50        | 3         |
| 9         | CuI          | <b>L9</b>  | 79        | 0         |
| 10        | CuI          | <b>L10</b> | 86        | 0         |
| 11        | CuBr         | <b>L4</b>  | 90        | 90        |
| <b>12</b> | <b>CuSCN</b> | <b>L4</b>  | <b>99</b> | <b>96</b> |
| 13        | CuOTf        | <b>L4</b>  | 85        | 91        |
| 14        | CuTc         | <b>L4</b>  | 90        | 93        |
| 15        | CuOAc        | <b>L4</b>  | 88        | 86        |
| 16        | CuSCN        | <b>L5</b>  | 90        | 54        |

|    |       |            |    |    |
|----|-------|------------|----|----|
| 17 | CuSCN | <b>L11</b> | 98 | 0  |
| 18 | CuSCN | <b>L12</b> | 96 | 68 |
| 19 | CuSCN | <b>L13</b> | 84 | 81 |
| 20 | CuSCN | <b>L14</b> | 95 | 92 |
| 21 | CuSCN | <b>L15</b> | 95 | 92 |

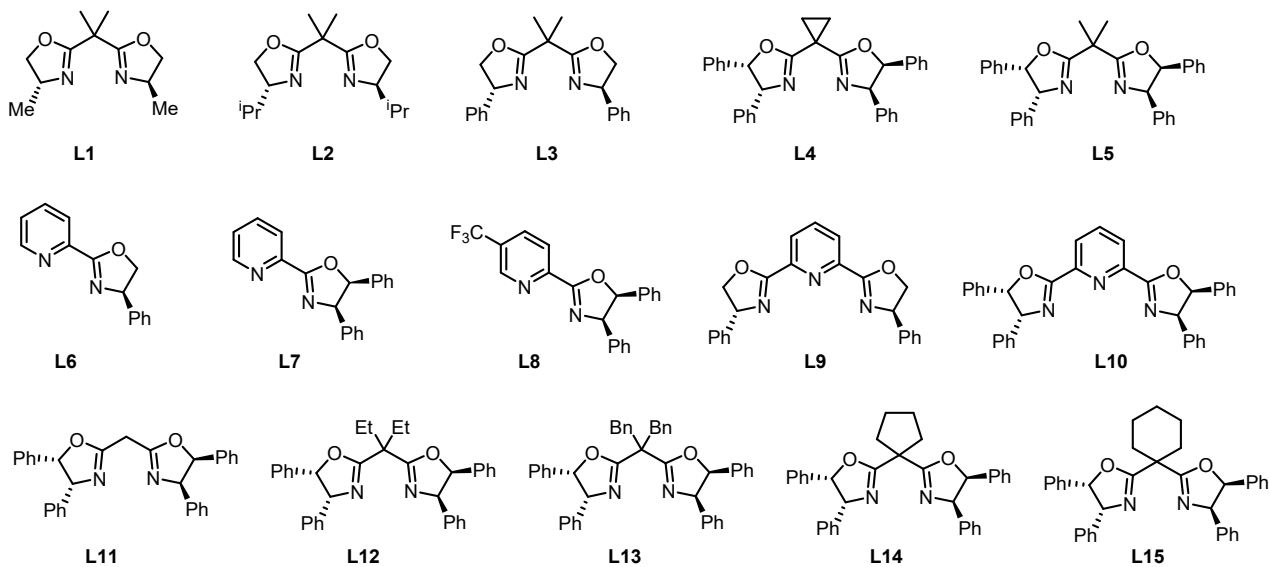

[a]Reaction conditions: **1a** (0.1 mmol), catalyst (0.01 mmol) and ligand (0.011 mmol) were used, the yields were determined by the column chromatography.

### 3. Enantioselective Copper-Catalyzed Synthesis of Axially Chiral Deuterated Biaryl Ethers and Phenols from Cyclic Iodonium Salts

#### 3.1 General Procedure A

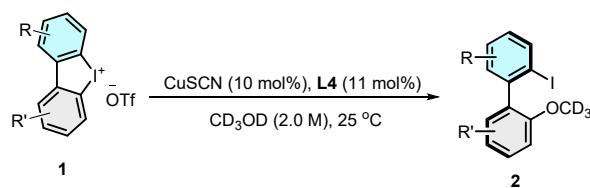

To a 5 mL reaction tube with a stir bar was charged with CuSCN (2.5 mg, 10 mol%, 0.01 mmol), **L4** (10.6 mg, 11 mol%, 0.011 mmol) and cyclic diaryliodonium salts **1** (0.2 mmol). The tube was sealed with rubber septum, then evacuated and backfilled with nitrogen for three cycles, CD<sub>3</sub>OD (0.1 mL, 2.0 M) was added. The reaction mixture was stirred at appreciate temperature for 6 h. The reaction mixture was quenched with water (10.0 mL), and extracted with ethyl acetate (3 × 15.0 mL). The combined organic layers were washed with water, brine, dried over anhydrous Na<sub>2</sub>SO<sub>4</sub>, and

concentrated under reduced pressure. The residue was purified by flash chromatography on silica gel to afford the desired product **2**.

### 3.2 General Procedure B

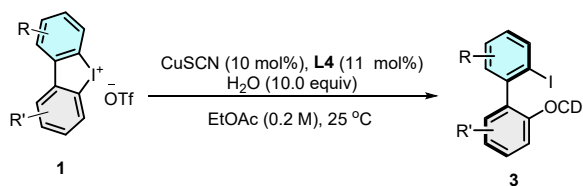

To a 5 mL reaction tube with a stir bar was charged with CuSCN (2.5 mg, 10 mol %, 0.01 mmol), L4 (10.6 mg, 11 mol%, 0.011 mmol), H<sub>2</sub>O (36  $\mu$ L, 10.0 equiv, 2.0 mmol) and cyclic diaryliodonium salts **1** (0.2 mmol), The tube was sealed with rubber septum, then EtOAc (1.0 mL, 0.2 M) was added. The reaction mixture was stirred at appreciate temperature for 6 h. The reaction mixture was quenched with water (10.0 mL), and extracted with ethyl acetate (3  $\times$  15.0 mL). The combined organic layers were washed with water, brine, dried over anhydrous Na<sub>2</sub>SO<sub>4</sub>, and concentrated under reduced pressure. The residue was purified by flash chromatography on silica gel to afford the desired product **3**.

### 3.3 Characterization Data of Products

#### (*R*)-2-iodo-2'-(methoxy-*d*<sub>3</sub>)-6,6'-dimethyl-1,1'-biphenyl (**2a**)

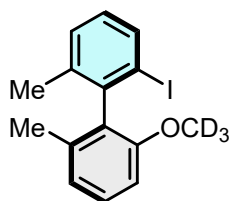

This compound was prepared according to the **General procedure A** from the reaction of **1a** (91.2 mg, 0.2 mmol).

67.5 mg, 99% yield, 96% ee, white solid.

<sup>1</sup>H NMR (400 MHz, CDCl<sub>3</sub>)  $\delta$  7.69 (d,  $J$  = 7.9 Hz, 1H), 7.22 (t,  $J$  = 7.9 Hz, 1H), 7.17 (d,  $J$  = 7.7 Hz, 1H), 6.91 – 6.81 (m, 2H), 6.75 (d,  $J$  = 8.2 Hz, 1H), 1.94 (s, 3H), 1.85 (s, 3H). <sup>13</sup>C NMR (101 MHz, CDCl<sub>3</sub>)  $\delta$  156.2, 142.4, 138.2, 137.0, 136.4, 132.7, 129.5, 128.7, 128.6, 122.4, 108.4, 101.7, 63.8-62.8 (m), 21.3, 19.4. HRMS (ESI): [M+H]<sup>+</sup> calcd for C<sub>15</sub>H<sub>13</sub>D<sub>3</sub>IO 342.0249, found 342.0240.

**Chiral HPLC:** CHIRALPAK OX-H, 25 °C, iPrOH-hexanes 1.0/99.0, 1.0 mL/min, 247 nm.  $t_R$ (major) = 7.4 min,  $t_R$ (minor) = 14.0 min.

$[\alpha]_D^{25} = -9.2^\circ$  (c = 1.01, CH<sub>2</sub>Cl<sub>2</sub>)

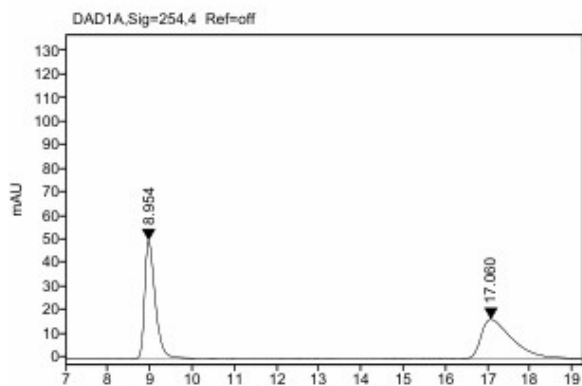

Signal: DAD1A,Sig=254,4 Ref=off

| RT [min] | Area    | Area% |
|----------|---------|-------|
| 8.954    | 854.01  | 50.35 |
| 17.060   | 842.07  | 49.65 |
| Sum      | 1696.08 |       |

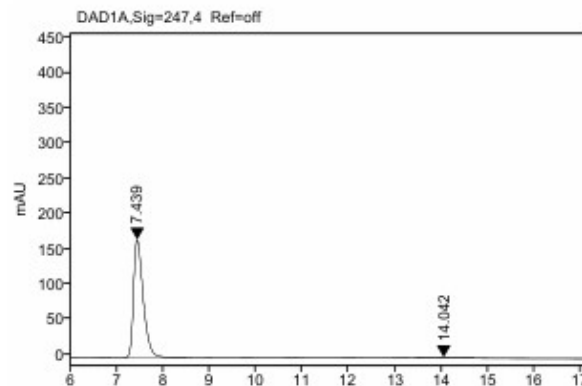

Signal: DAD1A,Sig=247,4 Ref=off

| RT [min] | Area    | Area% |
|----------|---------|-------|
| 7.439    | 2415.42 | 98.14 |
| 14.042   | 45.87   | 1.86  |
| Sum      | 2461.29 |       |

**(R)-2-iodo-6-isopropyl-2'-(methoxy-*d*<sub>3</sub>)-6'-methyl-1,1'-biphenyl (2b)**

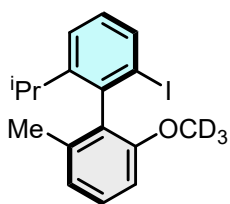

This compound was prepared according to the **General procedure A** from the reaction of **1b** (96.8 mg, 0.2 mmol).

65.0 mg, 88% yield, >99% ee, white solid.

<sup>1</sup>H NMR (400 MHz, CDCl<sub>3</sub>) δ 7.77 (dd, *J* = 7.9, 1.3 Hz, 1H), 7.39 (t, *J* = 8.0 Hz, 1H), 7.26 – 7.21 (m, 1H), 7.02 (dd, *J* = 7.9, 1.1 Hz, 1H), 6.94 (t, *J* = 7.7 Hz, 1H), 6.81 (dd, *J* = 8.2, 1.1 Hz, 1H), 2.52 – 2.37 (m, 1H), 2.04 (s, 3H), 1.21 (d, *J* = 6.9 Hz, 3H), 1.07 (d, *J* = 6.8 Hz, 3H).

<sup>13</sup>C NMR (101 MHz, CDCl<sub>3</sub>) δ 155.9, 147.5, 142.3, 138.6, 136.3, 129.4, 129.1, 128.6, 125.1, 117.9, 108.2, 102.6, 55.2-54.6 (m), 30.2, 24.0, 23.9, 21.7. **HRMS (ESI):** [M+H]<sup>+</sup> calcd for C<sub>17</sub>H<sub>17</sub>D<sub>3</sub>IO 370.0742, found 370.0744.

**Chiral HPLC:** CHIRALPAK OX-H, 25 °C, iPrOH-hexanes 1.0/99.0, 1.0 mL/min, 247 nm. *t*<sub>R</sub>(major) = 12.8 min, *t*<sub>R</sub>(minor) = 18.2 min.

[α]<sub>D</sub><sup>25</sup> = -2.0° (c = 1.05, CH<sub>2</sub>Cl<sub>2</sub>)

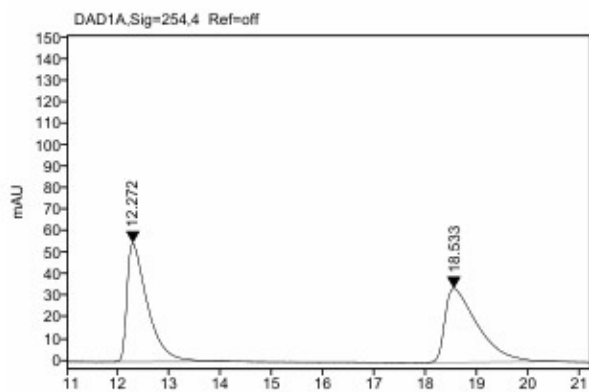

Signal: DAD1A, Sig=254,4 Ref=off

| RT [min] | Area    | Area% |
|----------|---------|-------|
| 12.272   | 1524.64 | 50.28 |
| 18.533   | 1507.54 | 49.72 |
| Sum      | 3032.18 |       |

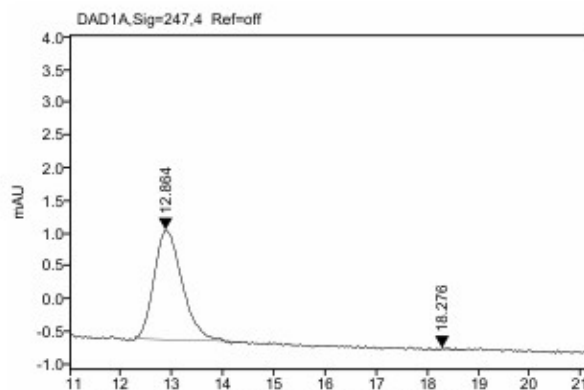

Signal: DAD1A, Sig=247,4 Ref=off

| RT [min] | Area  | Area% |
|----------|-------|-------|
| 12.864   | 63.60 | 99.79 |
| 18.276   | 0.14  | 0.21  |
| Sum      | 63.73 |       |

### (*R*)-2-iodo-2'-(methoxy-*d*<sub>3</sub>)-4,4',6,6'-tetramethyl-1,1'-biphenyl (**2c**)

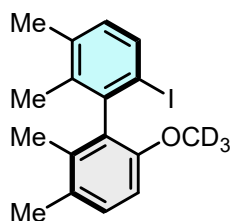

This compound was prepared according to the **General procedure A** from the reaction of **1c** (96.8 mg, 0.2 mmol).

68.6 mg, 93% yield, >99% ee, white solid.

<sup>1</sup>H NMR (400 MHz, CDCl<sub>3</sub>) δ 7.59 (d, *J* = 8.0 Hz, 1H), 7.09 (d, *J* = 8.3 Hz, 1H), 6.78 (d, *J* = 8.0 Hz, 1H), 6.66 (d, *J* = 8.4 Hz, 1H), 2.20 (s, 3H), 2.20 (s, 3H), 1.85

(s, 3H), 1.73 (s, 3H). <sup>13</sup>C NMR (101 MHz, CDCl<sub>3</sub>) δ 154.5, 142.6, 136.9, 136.6, 135.7, 135.4, 133.5, 130.3, 129.4, 128.8, 108.1, 98.6, 54.9-52.5 (m), 20.3, 19.8, 17.8, 16.0. **HRMS (ESI):** [M+H]<sup>+</sup> calcd for C<sub>17</sub>H<sub>17</sub>D<sub>3</sub>IO 370.0742, found 370.0740.

**Chiral HPLC:** CHIRALPAK OX-H, 25 °C, iPrOH-hexanes 1.0/99.0, 1.0 mL/min, 247nm. *t*<sub>R</sub>(minor) = 10.8 min, *t*<sub>R</sub>(major) = 19.6 min.

$[\alpha]_D^{25} = +13.0^\circ$  (c = 1.5, CH<sub>2</sub>Cl<sub>2</sub>)

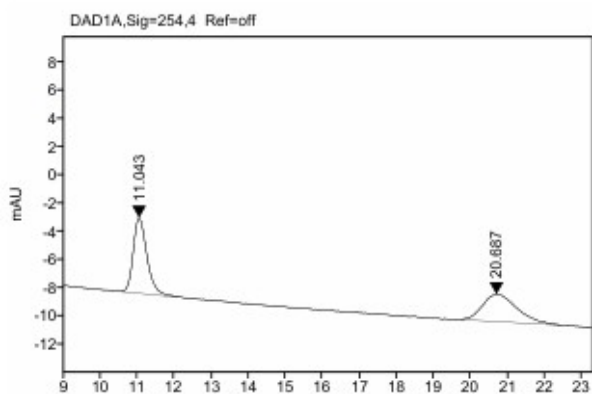

Signal: DAD1A, Sig=254,4 Ref=off

| RT [min] | Area   | Area% |
|----------|--------|-------|
| 11.043   | 137.83 | 52.46 |
| 20.687   | 124.89 | 47.54 |
| Sum      | 262.72 |       |

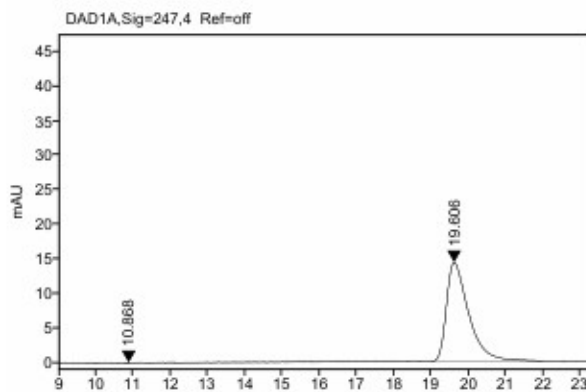

Signal: DAD1A, Sig=247,4 Ref=off

| RT [min] | Area   | Area% |
|----------|--------|-------|
| 10.868   | 0.08   | 0.01  |
| 19.606   | 590.57 | 99.99 |
| Sum      | 590.64 |       |

### (*R*)-2-iodo-2'-(methoxy-*d*<sub>3</sub>)-4,4',6,6'-tetramethyl-1,1'-biphenyl (**2d**)

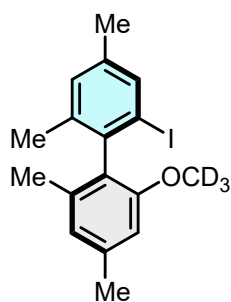

This compound was prepared according to the **General procedure A** from the reaction of **1d** (96.8 mg, 0.2 mmol).

65.7 mg, 89% yield, >99% ee, white solid.

<sup>1</sup>H NMR (400 MHz, CDCl<sub>3</sub>) δ 7.60 (s, 1H), 7.05 (s, 1H), 6.73 (s, 1H), 6.63 (s, 1H), 2.38 (s, 3H), 2.30 (s, 3H), 1.97 (s, 3H), 1.88 (s, 3H). <sup>13</sup>C NMR (101 MHz, CDCl<sub>3</sub>) δ 156.3, 139.5, 138.4, 138.3, 138.2, 137.9, 136.8, 130.5, 129.7, 123.1,

109.4, 102.1, 55.6-54.6 (m), 21.8, 21.3, 20.6, 19.4. **HRMS (ESI):** [M+H]<sup>+</sup> calcd for C<sub>17</sub>H<sub>17</sub>D<sub>3</sub>IO 370.0742, found 370.0740.

**Chiral HPLC:** CHIRALPAK OX-H, 25 °C, iPrOH-hexanes 1.0/99.0, 1.0 mL/min, 247 nm. t<sub>R</sub>(major) = 7.2 min, t<sub>R</sub>(minor) = 18.7 min.

[α]<sub>D</sub><sup>25</sup> = -10.0° (c = 1.3, CH<sub>2</sub>Cl<sub>2</sub>)

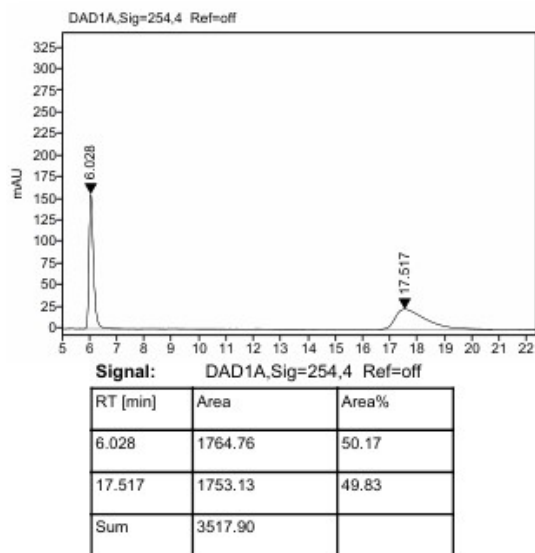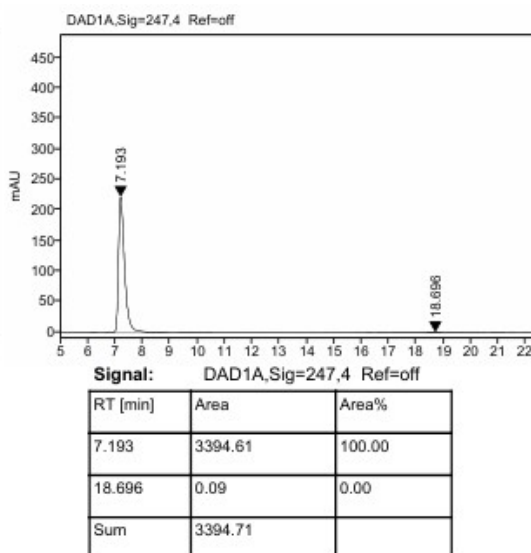

### (*R*)-2-iodo-2'-(methoxy-*d*<sub>3</sub>)-1,1'-binaphthalene (**2e**)

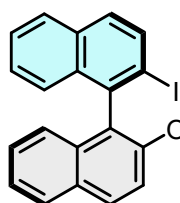

This compound was prepared according to the **General procedure A** from the reaction of **1e** (105.6 mg, 0.2 mmol).

62.8 mg, 76% yield, 92% ee, white solid.

<sup>1</sup>H NMR (400 MHz, DMSO-*d*<sub>6</sub>) δ 8.04 (dd, *J* = 9.0, 3.4 Hz, 2H), 7.92 – 7.83 (m, 2H), 7.66 (d, *J* = 8.7 Hz, 1H), 7.50 – 7.42 (m, 2H), 7.37 – 7.31 (m, 1H), 7.24 – 7.15 (m, 2H), 6.96 (dd, *J* = 8.4, 1.0 Hz, 1H). <sup>13</sup>C NMR (101 MHz, DMSO-*d*<sub>6</sub>) δ 154.2, 139.8, 135.6, 133.8, 132.9, 130.1, 129.1, 129.0, 128.0, 127.9, 126.8, 126.7, 126.2, 125.7, 124.6, 123.8, 113.8, 100.5, 61.0-60.1 (m).

**HRMS (ESI):** [M+H]<sup>+</sup> calcd for C<sub>21</sub>H<sub>13</sub>D<sub>3</sub>IO 414.0429, found 414.0435.

**Chiral HPLC:** CHIRALPAK OX-H, 25 °C, iPrOH-hexanes 2.0/98.0, 1.0 mL/min, 254 nm. *t*<sub>R</sub>(major) = 7.5 min, *t*<sub>R</sub>(minor) = 8.7 min.

$[\alpha]_D^{25} = -1.0^\circ$  (c = 0.5, CH<sub>2</sub>Cl<sub>2</sub>)

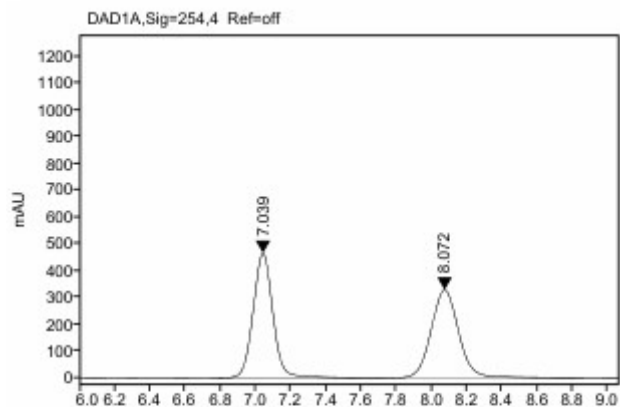

Signal: DAD1A,Sig=254,4 Ref=off

| RT [min] | Area    | Area% |
|----------|---------|-------|
| 7.039    | 3605.11 | 50.49 |
| 8.072    | 3535.32 | 49.51 |
| Sum      | 7140.43 |       |

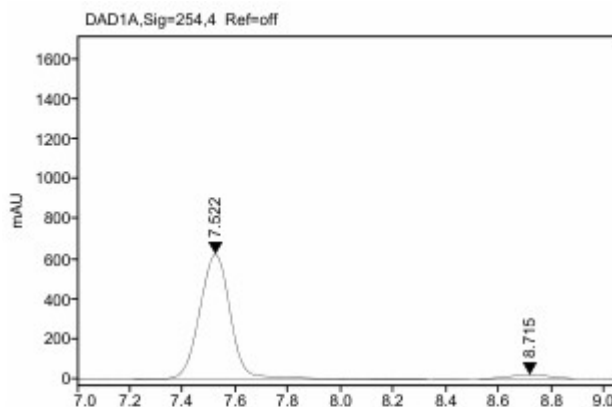

Signal: DAD1A,Sig=254,4 Ref=off

| RT [min] | Area    | Area% |
|----------|---------|-------|
| 7.522    | 5065.27 | 96.12 |
| 8.715    | 204.22  | 3.88  |
| Sum      | 5269.49 |       |

### (*R*)-2-chloro-6-iodo-2'-(methoxy-*d*<sub>3</sub>)-6'-methyl-1,1'-biphenyl (2f)

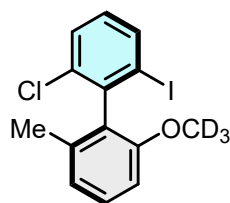

This compound was prepared according to the **General procedure A** from the reaction of **1f** (95.2 mg, 0.2 mmol).

67.3 mg, 93% yield, 92% ee, white solid.

<sup>1</sup>H NMR (400 MHz, DMSO-*d*<sub>6</sub>) δ 7.84 (dd, *J* = 7.9, 1.2 Hz, 1H), 7.47 (dd, *J* = 8.0, 1.2 Hz, 1H), 7.32 (t, *J* = 8.0 Hz, 1H), 6.97 (t, *J* = 8.0 Hz, 1H), 6.92 (d, *J* = 7.7 Hz, 1H), 6.83 (d, *J* = 8.3 Hz, 1H), 1.98 (s, 3H). <sup>13</sup>C NMR (101 MHz, DMSO-*d*<sub>6</sub>) δ 156.2, 141.6, 137.4, 136.3, 133.7, 131.5, 129.7, 129.3, 129.2, 122.2, 108.6, 101.7, 55.3-53.4 (m), 19.3. HRMS (ESI): [M+H]<sup>+</sup> calcd for C<sub>14</sub>H<sub>10</sub>D<sub>3</sub>ClIO 361.9882, found 361.9880.

**Chiral HPLC:** CHIRALPAK OX-H, 25 °C, iPrOH-hexanes 1.0/99.0, 1.0 mL/min, 247 nm. *t*<sub>R</sub>(major) = 13.1 min, *t*<sub>R</sub>(minor) = 14.9 min.

$[\alpha]_D^{25} = -11.5^\circ$  (*c* = 1.1, CH<sub>2</sub>Cl<sub>2</sub>)

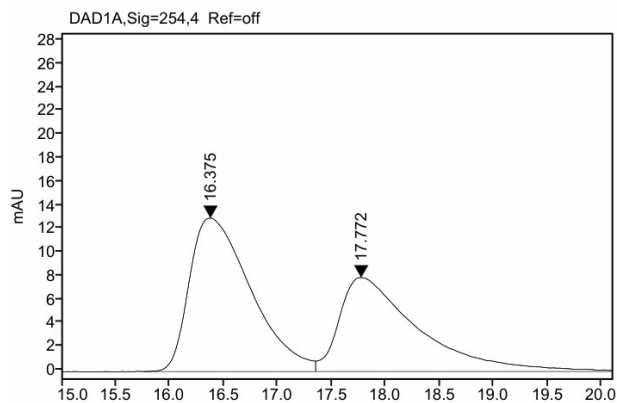

Signal: DAD1A, Sig=254,4 Ref=off

| RT [min] | Area   | Area% |
|----------|--------|-------|
| 16.375   | 516.86 | 56.06 |
| 17.772   | 405.10 | 43.94 |
| Sum      | 921.96 |       |

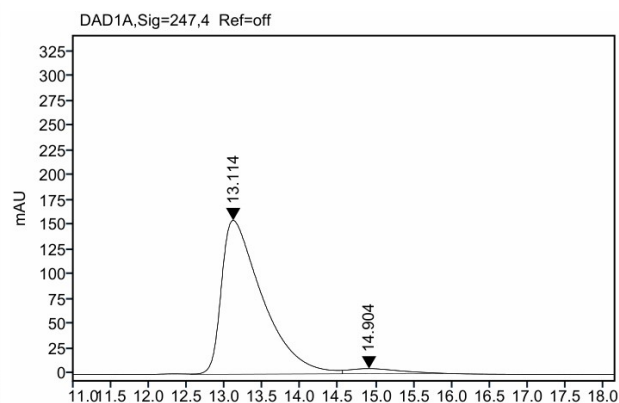

Signal: DAD1A, Sig=247,4 Ref=off

| RT [min] | Area    | Area% |
|----------|---------|-------|
| 13.114   | 5839.01 | 96.14 |
| 14.904   | 234.17  | 3.86  |
| Sum      | 6073.18 |       |

### (*R*)-2,2'-dichloro-6-iodo-6'-(methoxy-*d*<sub>3</sub>)-1,1'-biphenyl (**2g**)

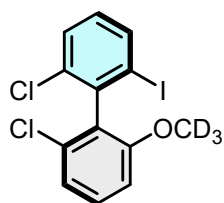

This compound was prepared according to the **General procedure A** from the reaction of **1g** (99.4 mg, 0.2 mmol).

72.6 mg, 95% yield, 85% ee, white solid.

<sup>1</sup>H NMR (400 MHz, DMSO-*d*<sub>6</sub>) δ 7.84 (dd, *J* = 7.9, 1.1 Hz, 1H), 7.47 (dd, *J* = 8.0, 1.1 Hz, 1H), 7.35 (t, *J* = 8.2 Hz, 1H), 7.12 (dd, *J* = 8.1, 1.1 Hz, 1H), 7.01 (t, *J* = 8.0 Hz, 1H), 6.90 (dd, *J* = 8.3, 1.0 Hz, 1H). <sup>13</sup>C NMR (101 MHz, DMSO-*d*<sub>6</sub>) δ 157.5, 139.9, 137.3, 134.2, 134.0, 130.7, 130.2, 129.7, 129.2, 121.5, 109.5, 101.1, 58.1-55.7 (m). HRMS (ESI): [M+H]<sup>+</sup> calcd for C<sub>13</sub>H<sub>7</sub>D<sub>3</sub>Cl<sub>2</sub>IO 381.9336, found 381.9337.

**Chiral HPLC:** CHIRALPAK OX-H, 25 °C, iPrOH-hexanes 1.0/99.0, 1.0 mL/min, 247 nm. *t*<sub>R</sub>(major) = 36.2 min, *t*<sub>R</sub>(minor) = 43.0 min.

[α]<sub>D</sub><sup>25</sup> = -5.0° (c = 1.2, CH<sub>2</sub>Cl<sub>2</sub>)

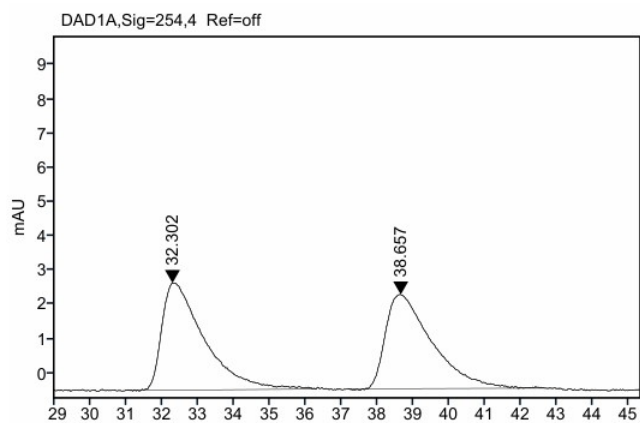

Signal: DAD1A, Sig=254,4 Ref=off

| RT [min] | Area   | Area% |
|----------|--------|-------|
| 32.302   | 255.94 | 51.05 |
| 38.657   | 245.45 | 48.95 |
| Sum      | 501.38 |       |

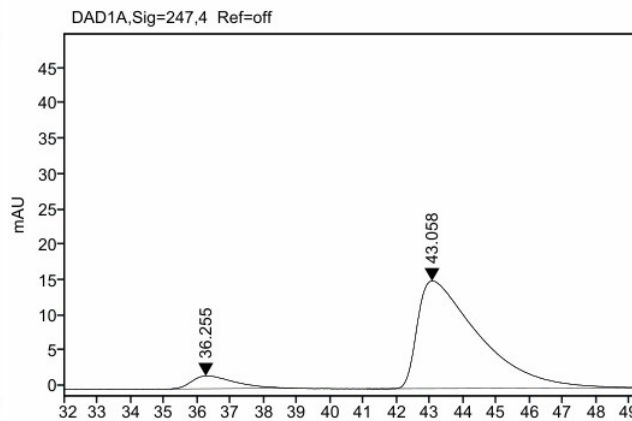

Signal: DAD1A, Sig=247,4 Ref=off

| RT [min] | Area    | Area% |
|----------|---------|-------|
| 36.255   | 161.88  | 7.66  |
| 43.058   | 1952.69 | 92.34 |
| Sum      | 2114.57 |       |

**(R)-4,4'-difluoro-2-iodo-2'-(methoxy-*d*<sub>3</sub>)-6,6'-dimethyl-1,1'-biphenyl (2h)**

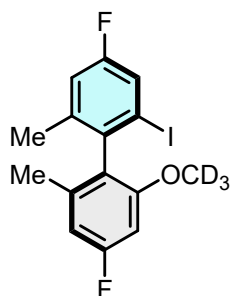

This compound was prepared according to the **General procedure A** from the reaction of **1h** (98.4 mg, 0.2 mmol).

61.0 mg, 81% yield, 78% ee, white solid.

<sup>1</sup>H NMR (400 MHz, CDCl<sub>3</sub>) δ 7.49 (dd, *J* = 7.9, 2.7 Hz, 1H), 6.99 (dd, *J* = 9.3, 2.7 Hz, 1H), 6.63 (dd, *J* = 9.3, 2.5 Hz, 1H), 6.55 (dd, *J* = 10.8, 2.5 Hz, 1H), 2.00 (s, 3H), 1.90 (s, 3H). <sup>13</sup>C NMR (101 MHz, CDCl<sub>3</sub>) δ 163.1 (d, *J*<sub>C-F</sub> = 245.3 Hz),

161.2 (d, *J*<sub>C-F</sub> = 250.2 Hz), 157.5 (d, *J*<sub>C-F</sub> = 16.0 Hz), 139.8 (d, *J*<sub>C-F</sub> = 7.1 Hz), 138.8 (d, *J*<sub>C-F</sub> = 10.1 Hz), 137.6, 127.4, 123.3 (d, *J*<sub>C-F</sub> = 23.2 Hz), 116.7 (d, *J*<sub>C-F</sub> = 21.2 Hz), 108.7 (d, *J*<sub>C-F</sub> = 21.2 Hz), 101.2 (d, *J*<sub>C-F</sub> = 8.1 Hz), 96.9 (d, *J*<sub>C-F</sub> = 26.3 Hz), 56.1-53.6 (m), 21.6, 19.6. **HRMS (ESI):** [M+H]<sup>+</sup> calcd for C<sub>15</sub>H<sub>11</sub>D<sub>3</sub>F<sub>2</sub>IO 378.0240, found 378.0240.

**Chiral HPLC:** CHIRALPAK OX-H, 25 °C, iPrOH-hexanes 1.0/99.0, 1.0 mL/min, 247 nm. *t*<sub>R</sub>(major) = 8.8 min, *t*<sub>R</sub>(minor) = 12.7 min.

[α]<sub>D</sub><sup>25</sup> = -3.8° (c = 1.0, CH<sub>2</sub>Cl<sub>2</sub>)

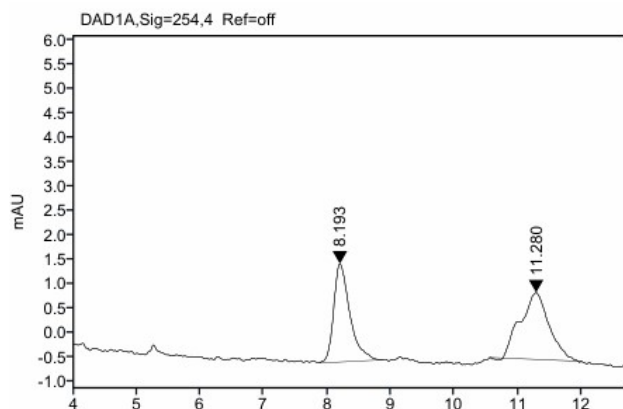

Signal: DAD1A, Sig=254,4 Ref=off

| RT [min] | Area  | Area% |
|----------|-------|-------|
| 8.193    | 35.70 | 45.38 |
| 11.280   | 42.97 | 54.62 |
| Sum      | 78.67 |       |

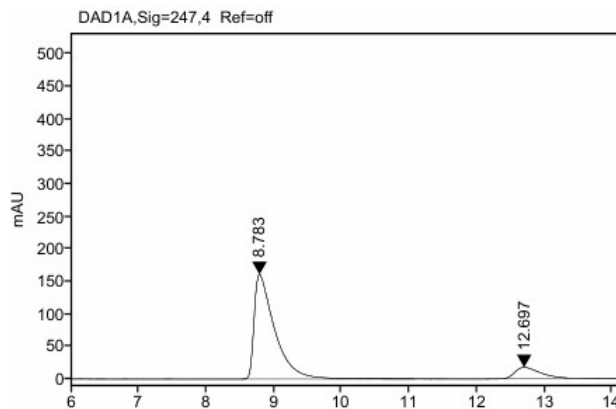

Signal: DAD1A, Sig=247,4 Ref=off

| RT [min] | Area    | Area% |
|----------|---------|-------|
| 8.783    | 3400.34 | 88.93 |
| 12.697   | 423.45  | 11.07 |
| Sum      | 3823.80 |       |

**(R)-2-iodo-2'-(methoxy-*d*<sub>3</sub>)-3,6-dimethyl-6'-(trifluoromethyl)-1,1'-biphenyl (2i)**

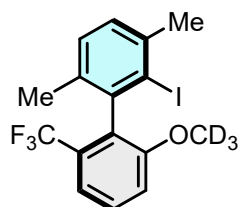

This compound was prepared according to the **General procedure A** from the reaction of **1i** (104.8 mg, 0.2 mmol).

75.5 mg, 88% yield, 40% ee, white solid.

<sup>1</sup>H NMR (400 MHz, CDCl<sub>3</sub>) δ 7.54 – 7.45 (m, 1H), 7.41 – 7.35 (m, 1H), 7.15 (dd, *J* = 15.2, 7.4 Hz, 3H), 2.48 (s, 3H), 1.98 (s, 3H). <sup>13</sup>C NMR (101 MHz, CDCl<sub>3</sub>) δ 157.0, 140.1, 139.0, 135.5, 132.6, 129.2, 129.0, 128.8, 123.5 (q, *J*<sub>C-F</sub> = 275.7 Hz), 118.3 (q, *J*<sub>C-F</sub> = 6.1 Hz), 114.5, 108.4, 57.2-53.7 (m), 29.3, 21.1. **HRMS (ESI):** [M+H]<sup>+</sup> calcd for C<sub>16</sub>H<sub>12</sub>D<sub>3</sub>F<sub>3</sub>IO 410.0302, found 410.0306.

**Chiral HPLC:** CHIRALPAK OX-H, 25 °C, iPrOH-hexanes 1.0/99.0, 1.0 mL/min, 247 nm. *t*<sub>R</sub>(major) = 12.3 min, *t*<sub>R</sub>(minor) = 25.9 min.

$[\alpha]_D^{25} = -6.8^\circ$  (c = 1.2, CH<sub>2</sub>Cl<sub>2</sub>)

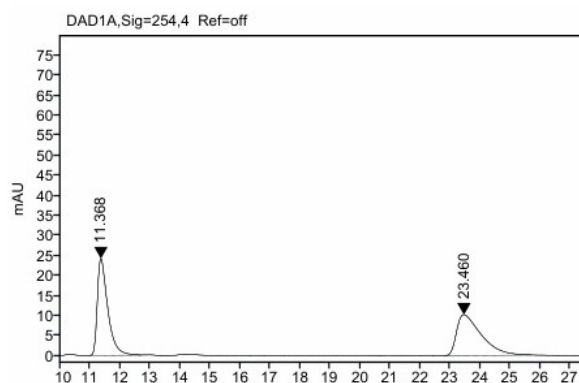

Signal: DAD1A,Sig=254,4 Ref=off

| RT [min] | Area    | Area% |
|----------|---------|-------|
| 11.368   | 583.89  | 50.08 |
| 23.460   | 582.00  | 49.92 |
| Sum      | 1165.89 |       |

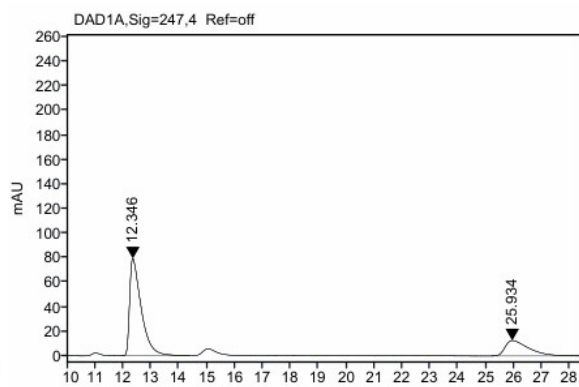

Signal: DAD1A,Sig=247,4 Ref=off

| RT [min] | Area    | Area% |
|----------|---------|-------|
| 12.346   | 2284.10 | 75.41 |
| 25.934   | 744.80  | 24.59 |
| Sum      | 3028.90 |       |

**(R)-2'-fluoro-2-iodo-6'-(methoxy-d<sub>3</sub>)-3,6-dimethyl-1,1'-biphenyl (2j)**

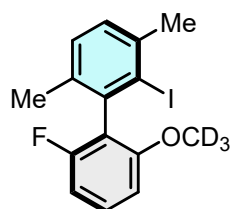

This compound was prepared according to the **General procedure A** from the reaction of **1j** (98.8 mg, 0.2 mmol).

63.2 mg, 88% yield, 40% ee, white solid.

<sup>1</sup>H NMR (400 MHz, CDCl<sub>3</sub>) δ 7.30 (t, *J* = 7.9 Hz, 1H), 7.19 (dd, *J* = 8.4, 5.6 Hz, 1H), 6.98 – 6.89 (m, 2H), 6.83 (d, *J* = 8.2 Hz, 1H), 1.99 (s, 3H), 1.90 (s, 3H). <sup>13</sup>C NMR (101 MHz, CDCl<sub>3</sub>) δ 160.3 (d, *J*<sub>C-F</sub> = 243.4 Hz), 156.1, 144.4, 136.9, 133.4 (d, *J*<sub>C-F</sub> = 3.0 Hz), 131.7, 130.7 (d, *J*<sub>C-F</sub> = 8.1 Hz), 128.9, 122.5, 113.7 (d, *J*<sub>C-F</sub> = 24.2 Hz), 108.5, 88.8 (d, *J*<sub>C-F</sub> = 24.2 Hz), 55.1-53.3 (m), 20.5, 19.3. **HRMS (ESI):** [M+H]<sup>+</sup> calcd for C<sub>15</sub>H<sub>12</sub>D<sub>3</sub>FIO 360.0334, found 360.0339.

**Chiral HPLC:** CHIRALPAK OX-H, 25 °C, iPrOH-hexanes 1.0/99.0, 1.0 mL/min, 247 nm. *t*<sub>R</sub>(major) = 13.1 min, *t*<sub>R</sub>(minor) = 19.4 min.

$$[\alpha]_D^{25} = -4.0^\circ \text{ (c = 1.3, CH}_2\text{Cl}_2\text{)}$$

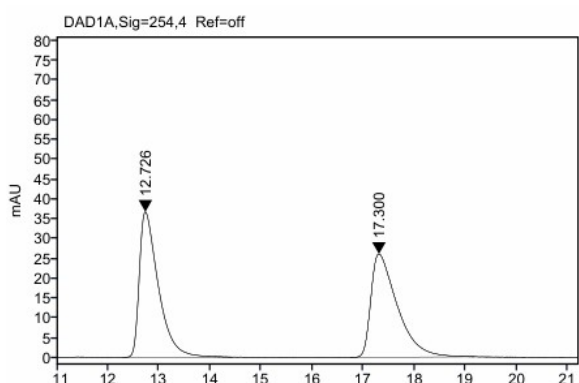

Signal: DAD1A,Sig=254,4 Ref=off

| RT [min] | Area    | Area% |
|----------|---------|-------|
| 12.726   | 946.30  | 50.23 |
| 17.300   | 937.78  | 49.77 |
| Sum      | 1884.08 |       |

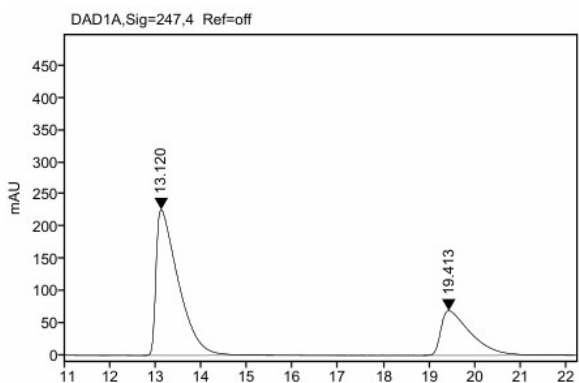

Signal: DAD1A,Sig=247,4 Ref=off

| RT [min] | Area     | Area% |
|----------|----------|-------|
| 13.120   | 7657.44  | 70.87 |
| 19.413   | 3147.01  | 29.13 |
| Sum      | 10804.46 |       |

### (*R*)-1-(2-iodo-3,6-dimethylphenyl)-2-(methoxy-*d*<sub>3</sub>)naphthalene (**2k**)

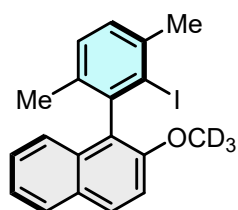

This compound was prepared according to the **General procedure A** from the reaction of **1k** (101.2 mg, 0.2 mmol).

61.0 mg, 78% yield, 42% ee, white solid.

<sup>1</sup>H NMR (400 MHz, CDCl<sub>3</sub>) δ 7.94 (d, *J* = 9.0 Hz, 1H), 7.88 – 7.80 (m, 1H), 7.37 (d, *J* = 9.1 Hz, 1H), 7.35 – 7.28 (m, 2H), 7.23 – 7.19 (m, 2H), 7.14 – 7.07 (m, 1H), 2.52 (s, 3H), 1.92 (s, 3H). <sup>13</sup>C NMR (101 MHz, CDCl<sub>3</sub>) δ 153.1, 141.7, 139.6, 136.0, 132.3, 129.4, 129.4, 129.0, 128.6, 128.0, 127.9, 126.7, 124.1, 123.6, 113.6, 109.4, 57.5-55.6 (m), 29.53, 21.10. **HRMS (ESI):** [M+H]<sup>+</sup> calcd for C<sub>19</sub>H<sub>15</sub>D<sub>3</sub>IO 392.0585, found 392.0582.

**Chiral HPLC:** CHIRALPAK OX-H, 25 °C, iPrOH-hexanes 3.0/97.0, 1.0 mL/min, 250 nm. *t*<sub>R</sub>(major) = 4.1 min, *t*<sub>R</sub>(minor) = 4.7 min.

[α]<sub>D</sub><sup>25</sup> = +24.1° (c = 1.3, CH<sub>2</sub>Cl<sub>2</sub>)

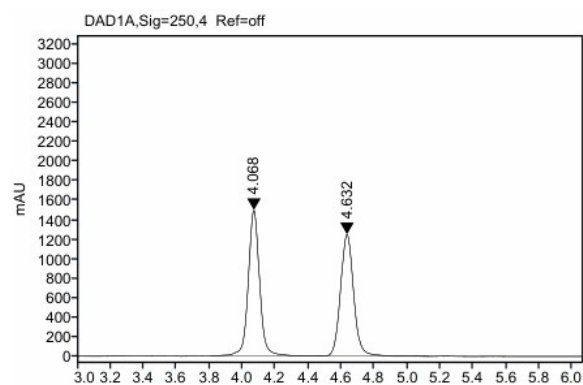

| Signal: DAD1A,Sig=250,4 Ref=off |          |       |
|---------------------------------|----------|-------|
| RT [min]                        | Area     | Area% |
| 4.068                           | 7137.75  | 50.64 |
| 4.632                           | 6957.61  | 49.36 |
| Sum                             | 14095.36 |       |

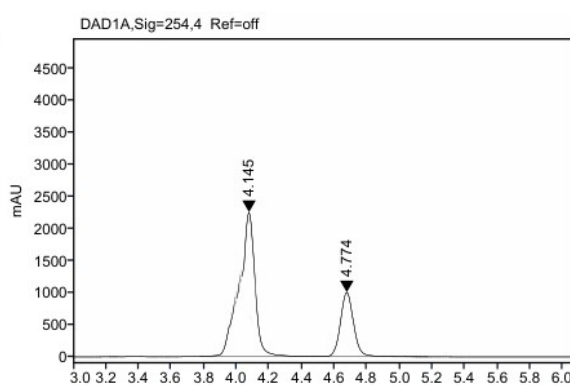

| Signal: DAD1A,Sig=254,4 Ref=off |          |       |
|---------------------------------|----------|-------|
| RT [min]                        | Area     | Area% |
| 4.145                           | 17989.88 | 71.09 |
| 4.774                           | 7321.65  | 28.91 |
| Sum                             | 25311.53 |       |

### (*R*)-2-ethoxy-2'-iodo-6,6'-dimethyl-1,1'-biphenyl (**3a**)

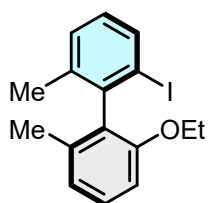

This compound was prepared according to the **General procedure A** from the reaction of **1a** (91.2 mg, 0.2 mmol), but EtOH (0.1 mL) instead of CD<sub>3</sub>OD.

65.4 mg, 93% yield, 96% ee, white solid.

<sup>1</sup>H NMR (400 MHz, CDCl<sub>3</sub>) δ 7.68 (d, *J* = 7.9 Hz, 1H), 7.21 – 7.17 (m, 1H), 7.17 – 7.13 (m, 1H), 6.85 (t, *J* = 7.7 Hz, 1H), 6.81 (d, *J* = 7.6 Hz, 1H), 6.73 (d, *J* = 8.2 Hz, 1H), 3.91 (q, *J* = 7.0 Hz, 2H), 1.94 (s, 3H), 1.85 (s, 3H), 1.12 (t, *J* = 7.0 Hz, 3H). <sup>13</sup>C NMR (101 MHz, CDCl<sub>3</sub>) δ 155.4, 142.6, 138.2, 137.0, 136.2, 133.1, 129.4, 128.5, 128.4, 122.2, 109.6, 101.7, 63.7, 21.3, 19.5, 14.8. **HRMS (ESI):** [M+H]<sup>+</sup> calcd for C<sub>16</sub>H<sub>18</sub>IO 353.0397, found 353.0401.

**Chiral HPLC:** CHIRALPAK OX-H, 25 °C, iPrOH-hexanes 1.0/99.0, 1.0 mL/min, 250 nm. *t*<sub>R</sub>(major)

= 5.3 min,  $t_R(\text{minor}) = 6.0$  min.

$$[\alpha]_D^{25} = -12.6^\circ \quad (c = 1.3, \text{CH}_2\text{Cl}_2)$$

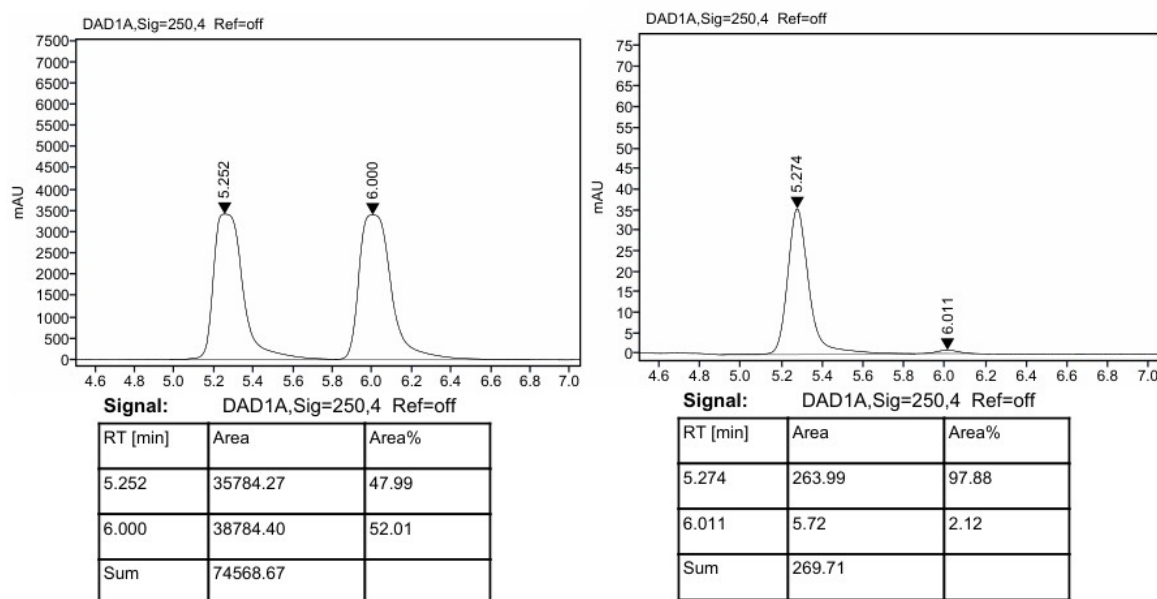

### (*R*)-2-ethoxy-2'-iodo-6'-isopropyl-6-methyl-1,1'-biphenyl (**3b**)

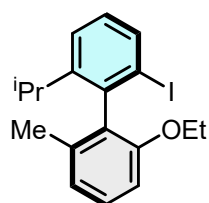

This compound was prepared according to the **General procedure A** from the reaction of **1b** (96.8 mg, 0.2 mmol), but EtOH (0.1 mL) instead of CD<sub>3</sub>OD.

66.9 mg, 88% yield, 99% ee, white solid.

<sup>1</sup>H NMR (400 MHz, CDCl<sub>3</sub>)  $\delta$  7.82 – 7.70 (m, 1H), 7.36 (t,  $J = 8.0$  Hz, 1H), 7.30 – 7.18 (m, 1H), 7.00 (dd,  $J = 7.9, 1.1$  Hz, 1H), 6.92 (t,  $J = 7.7$  Hz, 1H), 6.79 (dd,  $J = 8.2, 1.1$  Hz, 1H), 4.05 – 3.91 (m, 2H), 2.50 – 2.33 (m, 1H), 2.04 (s, 3H), 1.23 – 1.16 (m, 6H), 1.06 (d,  $J = 6.9$  Hz, 3H).

<sup>13</sup>C NMR (101 MHz, CDCl<sub>3</sub>)  $\delta$  155.2, 147.5, 142.4, 138.6, 136.2, 132.0, 129.3, 128.9, 128.4, 117.7, 109.3, 102.6, 63.8, 30.2, 24.0, 23.9, 21.7, 14.7. **HRMS (ESI):** [M+H]<sup>+</sup> calcd for C<sub>18</sub>H<sub>22</sub>IO 381.0710, found 381.0709.

**Chiral HPLC:** CHIRALPAK OX-H, 25 °C, iPrOH-hexanes 1.0/99.0, 1.0 mL/min, 254 nm.  $t_R(\text{minor}) = 5.6$  min,  $t_R(\text{major}) = 6.5$  min.

$$[\alpha]_D^{25} = -53.0^\circ \quad (c = 1.5, \text{CH}_2\text{Cl}_2)$$

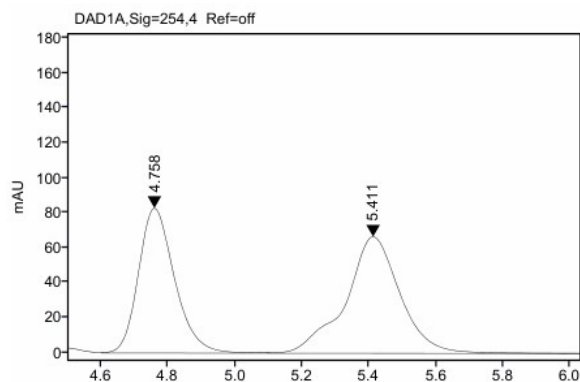

Signal: DAD1A,Sig=254,4 Ref=off

| RT [min] | Area    | Area% |
|----------|---------|-------|
| 4.758    | 622.51  | 45.18 |
| 5.411    | 755.33  | 54.82 |
| Sum      | 1377.84 |       |

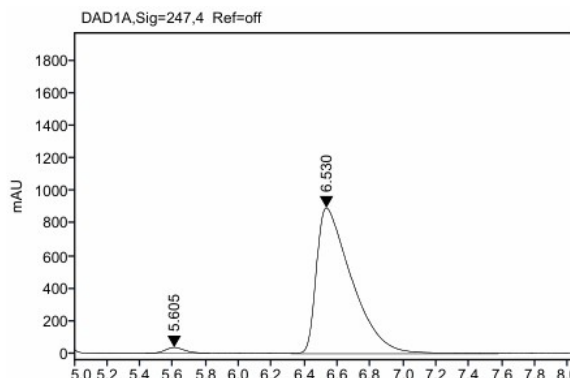

Signal: DAD1A,Sig=247,4 Ref=off

| RT [min] | Area     | Area% |
|----------|----------|-------|
| 5.605    | 277.92   | 2.03  |
| 6.530    | 13435.36 | 97.97 |
| Sum      | 13713.29 |       |

### (*R*)-6-ethoxy-6'-iodo-2,2',3,3'-tetramethyl-1,1'-biphenyl (**3c**)

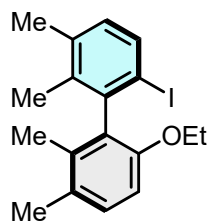

This compound was prepared according to the **General procedure A** from the reaction of **1c** (96.8 mg, 0.2 mmol), but EtOH (0.1 mL) instead of CD<sub>3</sub>OD.

61.0 mg, 80% yield, 97% ee, white solid.

<sup>1</sup>H NMR (400 MHz, CDCl<sub>3</sub>) δ 7.65 (d, *J* = 7.9 Hz, 1H), 7.13 (d, *J* = 8.3 Hz, 1H), 6.84 (d, *J* = 8.0 Hz, 1H), 6.72 (d, *J* = 8.3 Hz, 1H), 4.03 – 3.89 (m, 2H), 2.27 (s, 3H), 2.26 (s, 3H), 1.93 (s, 3H), 1.80 (s, 3H), 1.21 – 1.11 (m, 3H). <sup>13</sup>C NMR (101 MHz, CDCl<sub>3</sub>) δ 153.7, 142.7, 136.9, 136.4, 135.5, 135.5, 134.1, 130.1, 129.3, 128.6, 109.5, 98.6, 63.8, 20.3, 19.8, 17.8, 16.1, 14.8. **HRMS (ESI):** [M+H]<sup>+</sup> calcd for C<sub>18</sub>H<sub>22</sub>IO 381.0710, found 381.0709.

**Chiral HPLC:** CHIRALPAK OX-H, 25 °C, iPrOH-hexanes 1.0/99.0, 1.0 mL/min, 247 nm. *t<sub>R</sub>*(minor) = 24.8 min, *t<sub>R</sub>*(major) = 27.4 min.

$[\alpha]_D^{25} = -16.0^\circ$  (c = 1.2, CH<sub>2</sub>Cl<sub>2</sub>)

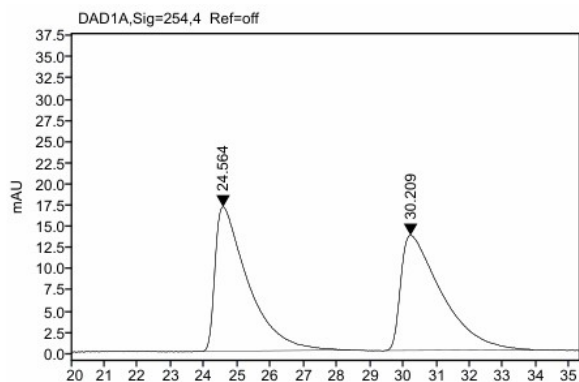

Signal: DAD1A,Sig=254,4 Ref=off

| RT [min] | Area    | Area% |
|----------|---------|-------|
| 24.564   | 1173.01 | 50.36 |
| 30.209   | 1156.20 | 49.64 |
| Sum      | 2329.21 |       |

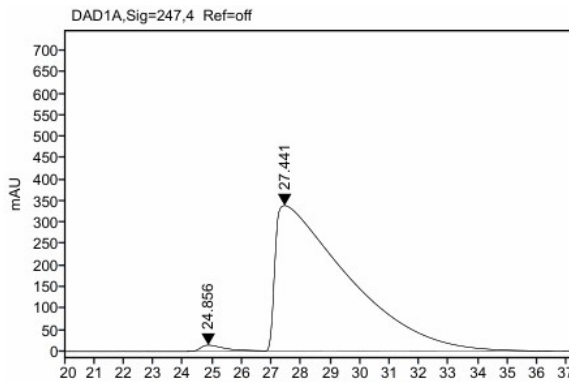

Signal: DAD1A,Sig=247,4 Ref=off

| RT [min] | Area     | Area% |
|----------|----------|-------|
| 24.856   | 915.58   | 1.55  |
| 27.441   | 58299.15 | 98.45 |
| Sum      | 59214.74 |       |

### (R)-2-ethoxy-2'-iodo-4,4',6,6'-tetramethyl-1,1'-biphenyl (3d)

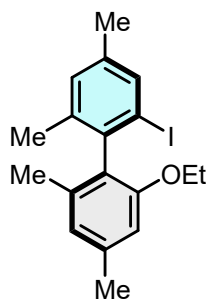

This compound was prepared according to the **General procedure A** from the reaction of **1d** (96.8 mg, 0.2 mmol), but EtOH (0.1 mL) instead of CD<sub>3</sub>OD.

68.4 mg, 82% yield, 82% ee, white solid.

<sup>1</sup>H NMR (400 MHz, CDCl<sub>3</sub>) δ 7.59 (s, 1H), 7.03 (s, 1H), 6.71 (s, 1H), 6.62 (s, 1H), 3.98 (q, *J* = 7.1 Hz, 2H), 2.37 (s, 3H), 2.30 (s, 3H), 1.97 (s, 3H), 1.88 (s, 3H), 1.20 (t, *J* = 7.0 Hz, 3H). <sup>13</sup>C NMR (101 MHz, CDCl<sub>3</sub>) δ 155.5, 139.6, 138.2, 138.1,

137.8, 136.8, 136.7, 130.4, 130.2, 122.9, 110.6, 102.1, 63.7, 21.7, 21.3, 20.5, 19.5, 14.9. **HRMS (ESI):** [M+H]<sup>+</sup> calcd for C<sub>18</sub>H<sub>22</sub>IO 381.0710, found 381.0709.

**Chiral HPLC:** CHIRALPAK OX-H, 25 °C, iPrOH-hexanes 1.0/99.0, 1.0 mL/min, 247 nm. *t*<sub>R</sub>(major) = 9.3 min, *t*<sub>R</sub>(minor) = 15.3 min.

[α]<sub>D</sub><sup>25</sup> = -7.0° (c = 1.2, CH<sub>2</sub>Cl<sub>2</sub>)

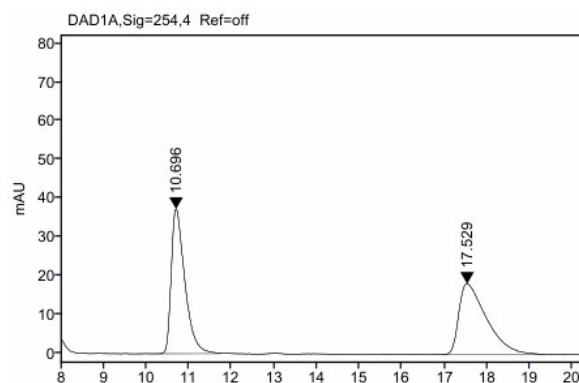

Signal: DAD1A,Sig=254,4 Ref=off

| RT [min] | Area    | Area% |
|----------|---------|-------|
| 10.696   | 832.10  | 50.17 |
| 17.529   | 826.38  | 49.83 |
| Sum      | 1658.48 |       |

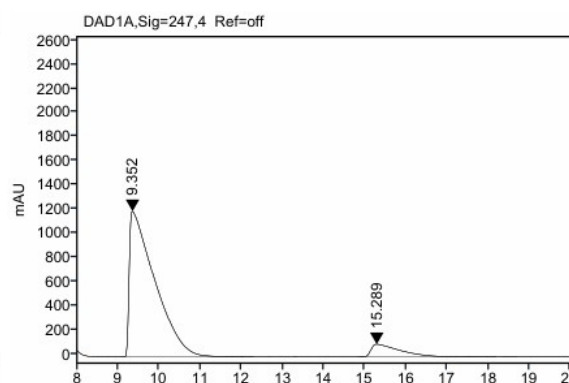

Signal: DAD1A,Sig=247,4 Ref=off

| RT [min] | Area     | Area% |
|----------|----------|-------|
| 9.352    | 51904.01 | 91.02 |
| 15.289   | 5121.08  | 8.98  |
| Sum      | 57025.09 |       |

### (*R*)-2-ethoxy-2'-iodo-1,1'-binaphthalene (**3e**)

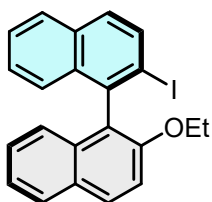

This compound was prepared according to the **General procedure A** from the reaction of **1e** (105.6 mg, 0.2 mmol), but EtOH (0.1 mL) instead of CD<sub>3</sub>OD.

70.4 mg, 83% yield, >99% ee, white solid.

<sup>1</sup>H NMR (400 MHz, CDCl<sub>3</sub>) δ 8.02 (dd, *J* = 15.6, 8.9 Hz, 2H), 7.88 (d, *J* = 8.2 Hz, 2H), 7.65 (d, *J* = 8.8 Hz, 1H), 7.49 – 7.39 (m, 2H), 7.36 – 7.31 (m, 1H), 7.25 – 7.14 (m, 3H), 6.97 (d, *J* = 7.5 Hz, 1H), 4.17 – 4.05 (m, 2H), 1.12 (t, *J* = 7.0 Hz, 3H). <sup>13</sup>C NMR (101 MHz, CDCl<sub>3</sub>) δ 135.6, 129.9, 128.9, 128.0, 126.9, 126.7, 126.1, 124.7, 123.7, 115.2, 64.9, 15.1. HRMS (ESI): [M+H]<sup>+</sup> calcd for C<sub>22</sub>H<sub>18</sub>IO 425.0397, found 425.0394.

**Chiral HPLC:** CHIRALPAK OX-H, 25 °C, iPrOH-hexanes 2.0/98.0, 1.0 mL/min, 254 nm. *t*<sub>R</sub>(major) = 4.3 min, *t*<sub>R</sub>(minor) = 4.7 min.

[α]<sub>D</sub><sup>25</sup> = -17.6° (c = 1.5, CH<sub>2</sub>Cl<sub>2</sub>)

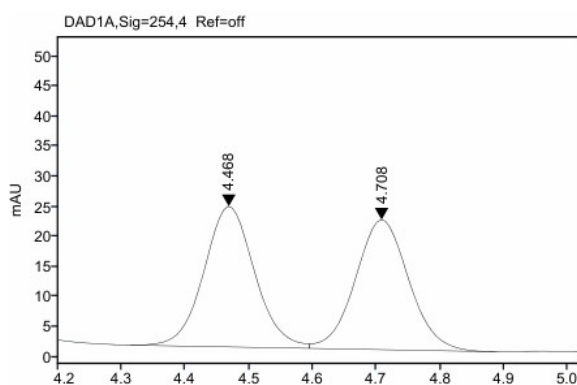

Signal: DAD1A,Sig=254,4 Ref=off

| RT [min] | Area   | Area% |
|----------|--------|-------|
| 4.468    | 129.45 | 50.69 |
| 4.708    | 125.94 | 49.31 |
| Sum      | 255.39 |       |

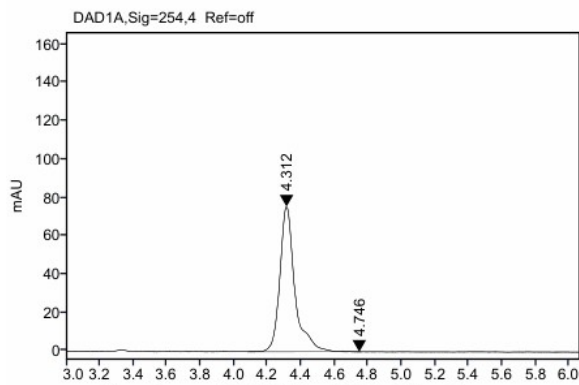

Signal: DAD1A,Sig=254,4 Ref=off

| RT [min] | Area   | Area% |
|----------|--------|-------|
| 4.312    | 472.64 | 99.98 |
| 4.746    | 0.08   | 0.02  |
| Sum      | 472.72 |       |

### (*R*)-2,2'-dichloro-6-ethoxy-6'-iodo-1,1'-biphenyl (**3f**)

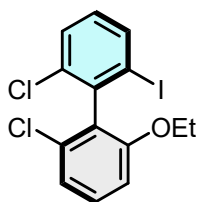

This compound was prepared according to the **General procedure A** from the reaction of **1g** (99.4 mg, 0.2 mmol), but EtOH (0.1 mL) instead of CD<sub>3</sub>OD.

62.9 mg, 80% yield, 71% ee, white solid.

<sup>1</sup>H NMR (400 MHz, CDCl<sub>3</sub>) δ 7.83 (dd, *J* = 7.9, 1.1 Hz, 1H), 7.46 (dd, *J* = 8.0, 1.2 Hz, 1H), 7.32 (t, *J* = 8.2 Hz, 1H), 7.10 (dd, *J* = 8.0, 1.0 Hz, 1H), 7.00 (t, *J* = 8.0 Hz, 1H), 6.89 (dd, *J* = 8.4, 0.9 Hz, 1H), 4.10 – 3.98 (m, 2H), 1.24 (t, *J* = 7.0 Hz, 3H). <sup>13</sup>C NMR (101 MHz, CDCl<sub>3</sub>) δ 156.9, 140.0, 137.2, 134.2, 134.0, 131.0, 130.1, 130.0, 129.1, 121.3, 110.5, 101.1, 64.5, 14.6. HRMS (ESI): [M+H]<sup>+</sup> calcd for C<sub>14</sub>H<sub>12</sub>Cl<sub>2</sub>IO 392.9304, found 392.9300.

**Chiral HPLC:** CHIRALPAK OX-H, 25 °C, iPrOH-hexanes 1.0/99.0, 1.0 mL/min, 247 nm. *t*<sub>R</sub>(major)

= 12.2 min,  $t_R(\text{major}) = 14.7$  min.

$$[\alpha]_D^{25} = -36.3^\circ \quad (c = 1.2, \text{CH}_2\text{Cl}_2)$$

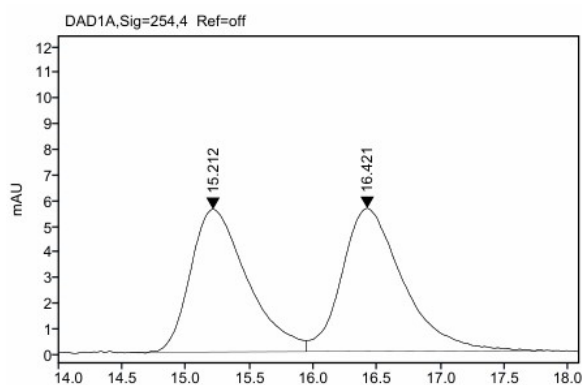

Signal: DAD1A, Sig=254,4 Ref=off

| RT [min] | Area   | Area% |
|----------|--------|-------|
| 15.212   | 172.15 | 48.12 |
| 16.421   | 185.57 | 51.88 |
| Sum      | 357.73 |       |

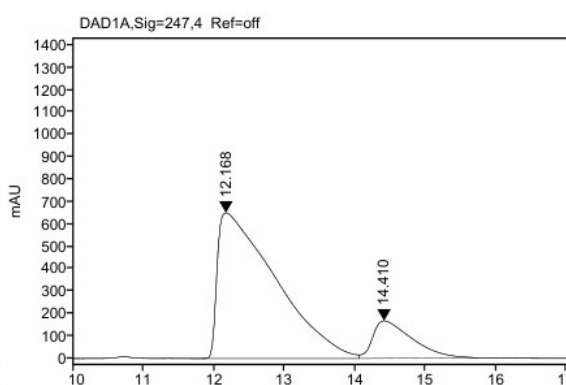

Signal: DAD1A, Sig=247,4 Ref=off

| RT [min] | Area     | Area% |
|----------|----------|-------|
| 12.168   | 37320.48 | 85.25 |
| 14.410   | 6456.30  | 14.75 |
| Sum      | 43776.78 |       |

### (*R*)-2'-ethoxy-2-iodo-3,6-dimethyl-6'-(trifluoromethyl)-1,1'-biphenyl (**3g**)

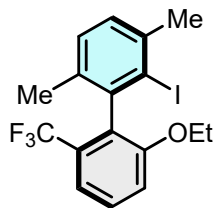

This compound was prepared according to the **General procedure A** from the reaction of **1i** (104.8 mg, 0.2 mmol), but EtOH (0.1 mL) instead of CD<sub>3</sub>OD.

44.0 mg, 96% yield, 61% ee, white solid.

<sup>1</sup>H NMR (400 MHz, CDCl<sub>3</sub>)  $\delta$  7.51 – 7.43 (m, 1H), 7.35 (d,  $J = 7.2$  Hz, 1H), 7.18 – 7.06 (m, 3H), 4.08 – 3.97 (m, 2H), 2.47 (s, 3H), 1.97 (s, 3H), 1.20 (t,  $J = 7.0$  Hz, 3H). <sup>13</sup>C NMR (101 MHz, CDCl<sub>3</sub>)  $\delta$  156.2, 140.2, 138.8, 135.5, 132.9, 129.4, 129.1, 128.9, 128.6, 123.5 (q,  $J_{C-F} = 275.7$  Hz), 118.0 (q,  $J_{C-F} = 5.1$  Hz), 115.4, 108.4, 64.3, 29.4, 21.1, 14.5. **HRMS (ESI):** [M+H]<sup>+</sup> calcd for C<sub>17</sub>H<sub>17</sub>F<sub>3</sub>IO 421.0271, found 421.0274.

**Chiral HPLC:** CHIRALPAK OX-H, 25 °C, iPrOH-hexanes 1.0/99.0, 1.0 mL/min, 247 nm.  $t_R(\text{major}) = 6.7$  min,  $t_R(\text{minor}) = 10.1$  min.

$$[\alpha]_D^{25} = -44.3^\circ \quad (c = 1.3, \text{CH}_2\text{Cl}_2)$$

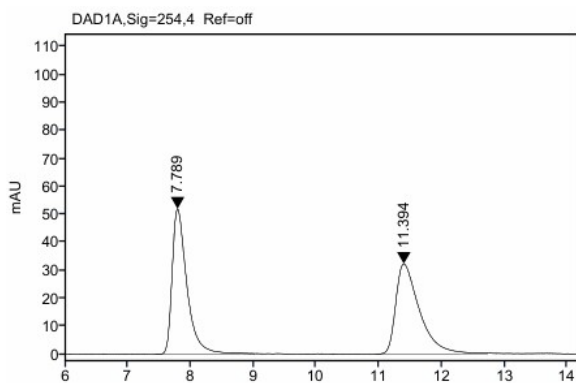

Signal: DAD1A,Sig=254,4 Ref=off

| RT [min] | Area    | Area% |
|----------|---------|-------|
| 7.789    | 847.40  | 50.09 |
| 11.394   | 844.38  | 49.91 |
| Sum      | 1691.78 |       |

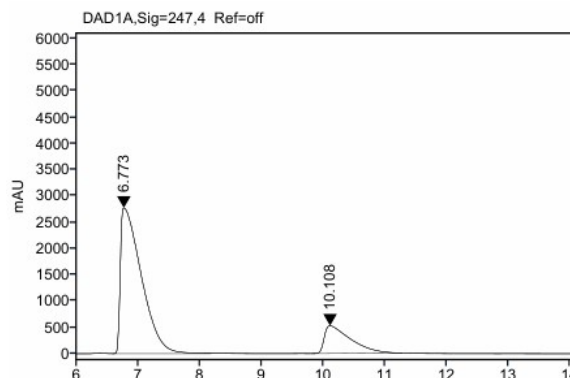

Signal: DAD1A,Sig=247,4 Ref=off

| RT [min] | Area     | Area% |
|----------|----------|-------|
| 6.773    | 65511.50 | 80.74 |
| 10.108   | 15624.12 | 19.26 |
| Sum      | 81135.62 |       |

**(R)-2-ethoxy-1-(2-iodo-3,6-dimethylphenyl)naphthalene (3h)**

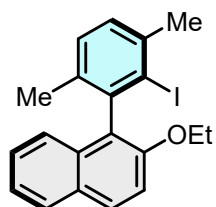

This compound was prepared according to the **General procedure A** from the reaction of **1k** (101.2 mg, 0.2 mmol), but EtOH (0.1 mL) instead of CD<sub>3</sub>OD.

67.7 mg, 94% yield, 33% ee, white solid.

<sup>1</sup>H NMR (400 MHz, CDCl<sub>3</sub>) δ 7.90 (d, *J* = 9.0 Hz, 1H), 7.87 – 7.80 (m, 1H), 7.38 – 7.29 (m, 3H), 7.19 (s, 2H), 7.13 – 7.07 (m, 1H), 4.23 – 4.08 (m, 2H), 2.52 (s, 3H), 1.92 (s, 3H), 1.25 (t, *J* = 7.0 Hz, 3H). <sup>13</sup>C NMR (101 MHz, CDCl<sub>3</sub>) δ 152.5, 141.8, 139.4, 136.0, 132.5, 129.2, 129.0, 128.5, 128.4, 128.0, 127.9, 126.5, 124.2, 123.6, 114.9, 109.4, 64.6, 29.5, 21.1, 15.2. **HRMS (ESI):** [M+H]<sup>+</sup> calcd for C<sub>20</sub>H<sub>20</sub>IO 403.0553, found 403.0556.

**Chiral HPLC:** CHIRALPAK OX-H, 25 °C, iPrOH-hexanes 2.0/98.0, 1.0 mL/min, 254 nm. *t<sub>R</sub>*(major) = 3.7 min, *t<sub>R</sub>*(minor) = 3.9 min.

[α]<sub>D</sub><sup>25</sup> = +5.8° (c = 1.1, CH<sub>2</sub>Cl<sub>2</sub>)

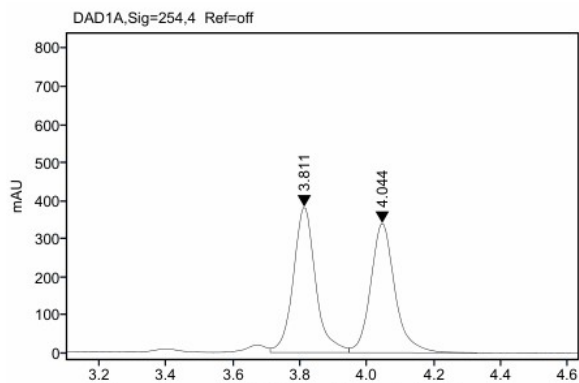

Signal: DAD1A,Sig=254,4 Ref=off

| RT [min] | Area    | Area% |
|----------|---------|-------|
| 3.811    | 1769.71 | 50.92 |
| 4.044    | 1705.87 | 49.08 |
| Sum      | 3475.57 |       |

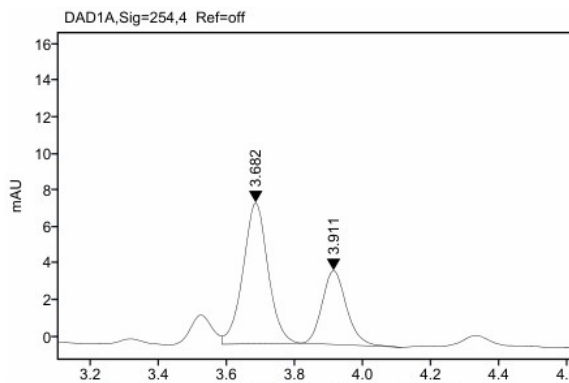

Signal: DAD1A,Sig=254,4 Ref=off

| RT [min] | Area  | Area% |
|----------|-------|-------|
| 3.682    | 39.46 | 66.18 |
| 3.911    | 20.16 | 33.82 |
| Sum      | 59.62 |       |

### (*R*)-2'-iodo-6,6'-dimethyl-[1,1'-biphenyl]-2-ol (**3i**)

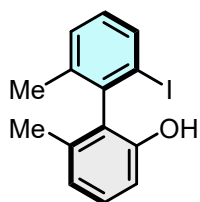

This compound was prepared according to the **General procedure B** from the reaction of **1a** (91.2 mg, 0.2 mmol).

64.1 mg, 99% yield, 99% ee, colorless oil.

<sup>1</sup>H NMR (400 MHz, CDCl<sub>3</sub>) δ 7.77 (d, *J* = 7.9 Hz, 1H), 7.25 (d, *J* = 7.6 Hz, 1H), 7.16 (t, *J* = 8.1 Hz, 1H), 6.96 (t, *J* = 7.8 Hz, 1H), 6.82 (d, *J* = 7.5 Hz, 1H), 6.78 (d, *J* = 8.1 Hz, 1H), 4.29 (s, 1H), 2.00 (s, 3H), 1.87 (s, 3H). <sup>13</sup>C NMR (101 MHz, CDCl<sub>3</sub>) δ 151.8, 139.6, 139.5, 137.3, 136.8, 130.4, 130.2, 130.1, 129.1, 122.2, 112.9, 102.4, 21.3, 19.5. **HRMS (ESI):** [M+H]<sup>+</sup> calcd for C<sub>14</sub>H<sub>14</sub>IO 325.0084, found 325.0081.

**Chiral HPLC:** CHIRALPAK OJ-H, 25 °C, iPrOH-hexanes 5.0/95.0, 1.0 mL/min, 254 nm. *t<sub>R</sub>*(minor) = 11.1 min, *t<sub>R</sub>*(major) = 14.1 min.

$[\alpha]_D^{25} = +10.5^\circ$  (c = 1.0, CH<sub>2</sub>Cl<sub>2</sub>)

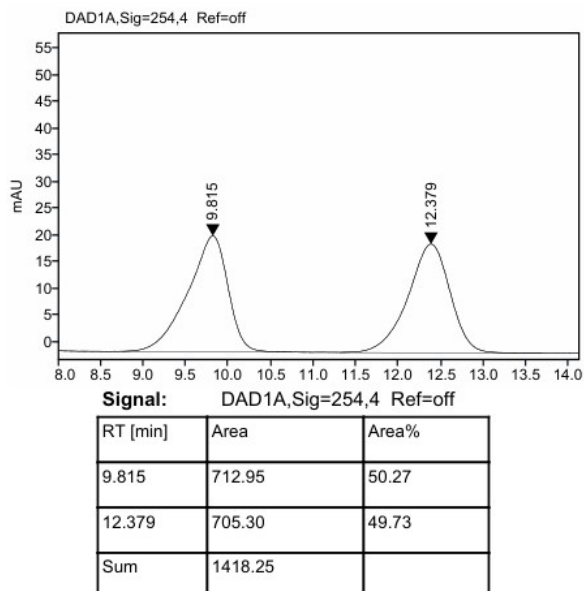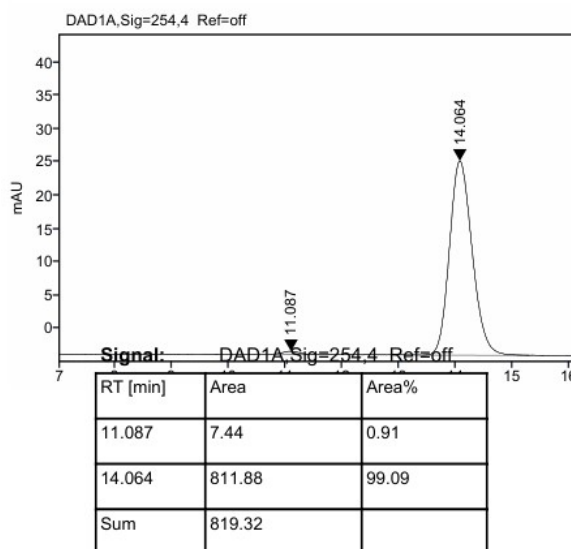

### (*R*)-6'-iodo-2',3',5,6-tetramethyl-[1,1'-biphenyl]-2-ol (**3j**)

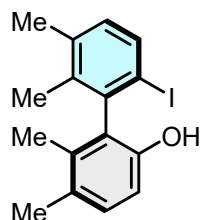

This compound was prepared according to the **General procedure B** from the reaction of **1c** (96.8 mg, 0.2 mmol).

69.7 mg, 99% yield, 97% ee, colorless oil.

$^1\text{H NMR}$  (400 MHz,  $\text{CDCl}_3$ )  $\delta$  7.72 (d,  $J = 8.0$  Hz, 1H), 7.10 (d,  $J = 8.2$  Hz, 1H), 6.92 (d,  $J = 8.0$  Hz, 1H), 6.76 (d,  $J = 8.2$  Hz, 1H), 4.26 (s, 1H), 2.29 (s, 3H), 2.25 (s, 3H), 1.98 (s, 3H), 1.82 (s, 3H).  $^{13}\text{C NMR}$  (101 MHz,  $\text{CDCl}_3$ )  $\delta$  149.9, 139.7, 138.3, 137.7, 136.6, 134.8, 131.6, 131.0, 130.2, 128.5, 112.3, 99.0, 20.3, 19.8, 17.7, 16.2. **HRMS (ESI)**:  $[\text{M}+\text{H}]^+$  calcd for  $\text{C}_{16}\text{H}_{18}\text{IO}$  353.0397, found 353.0400.

**Chiral HPLC**: CHIRALPAK OJ-H, 25 °C, iPrOH-hexanes 5.0/95.0, 1.0 mL/min, 254 nm.  $t_{\text{R}}$ (minor) = 8.0 min,  $t_{\text{R}}$ (major) = 13.7 min.

$[\alpha]_{\text{D}}^{25} = +21.2^\circ$  ( $c = 1.01$ ,  $\text{CH}_2\text{Cl}_2$ )

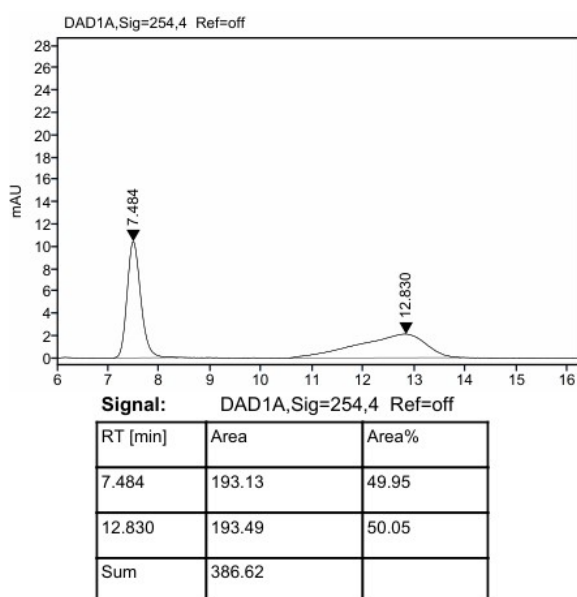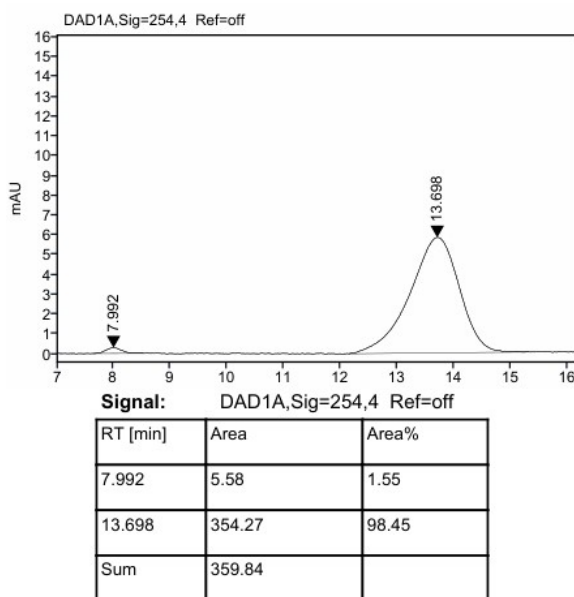

### (*R*)-2'-iodo-4,4',6,6'-tetramethyl-[1,1'-biphenyl]-2-ol (**3k**)

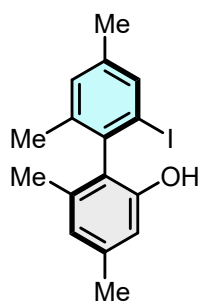

This compound was prepared according to the **General procedure B** from the reaction of **1d** (96.8 mg, 0.2 mmol).

64.1 mg, 91% yield, 90% ee, colorless oil.

<sup>1</sup>H NMR (400 MHz, CDCl<sub>3</sub>) δ 7.67 (s, 1H), 7.12 (s, 1H), 6.70 (s, 1H), 6.67 (s, 1H), 4.36 (s, 1H), 2.34 (s, 3H), 2.32 (s, 3H), 2.03 (s, 3H), 1.90 (s, 3H). <sup>13</sup>C NMR (101 MHz, CDCl<sub>3</sub>) δ 151.9, 140.1, 139.3, 139.1, 137.7, 136.5, 136.4, 131.4, 127.2, 123.0,

113.4, 102.8, 21.4, 21.3, 20.6, 19.5. **HRMS (ESI):** [M+Na]<sup>+</sup> calcd for C<sub>16</sub>H<sub>17</sub>INaO 375.0216, found 375.0220.

**Chiral HPLC:** CHIRALPAK OJ-H, 25 °C, iPrOH-hexanes 5.0/95.0, 1.0 mL/min, 254 nm. t<sub>R</sub>(minor) = 6.5 min, t<sub>R</sub>(major) = 7.7 min.

[α]<sub>D</sub><sup>25</sup> = -5.2° (c = 1.0, CH<sub>2</sub>Cl<sub>2</sub>)

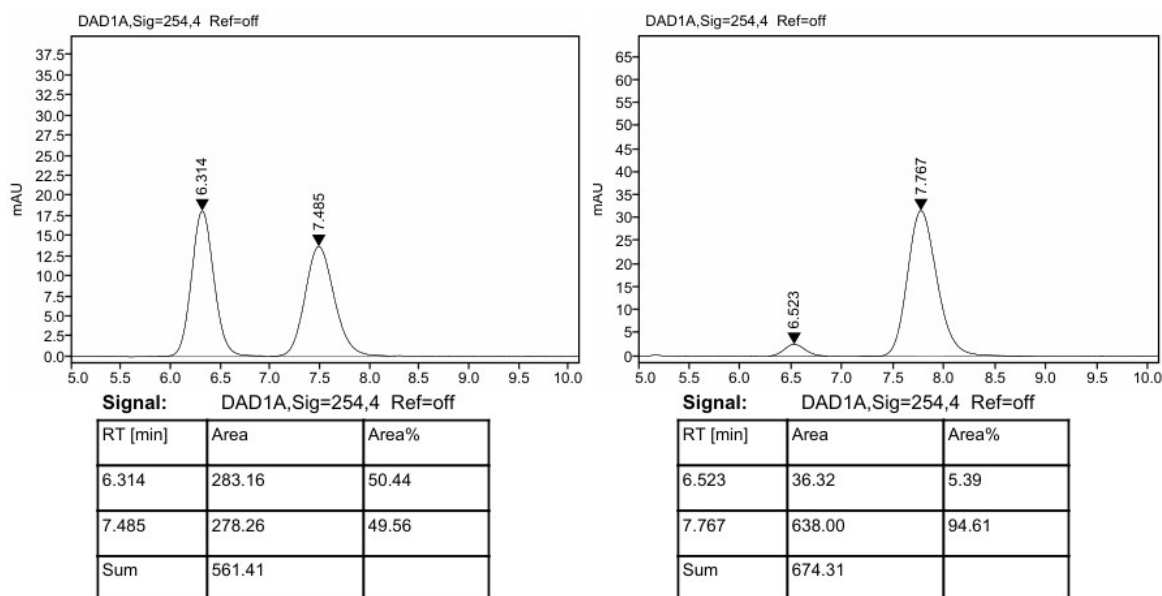

### (*R*)-2',6-dichloro-6'-iodo-[1,1'-biphenyl]-2-ol (**3l**)

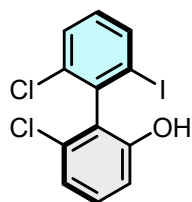

This compound was prepared according to the **General procedure B** from the reaction of **1g** (99.4 mg, 0.2 mmol).

67.9 mg, 93% yield, >99% ee, colorless oil.

<sup>1</sup>H NMR (400 MHz, CDCl<sub>3</sub>) δ 7.90 (dd, *J* = 8.1, 1.1 Hz, 1H), 7.53 (dd, *J* = 8.1, 1.1 Hz, 1H), 7.28 (t, *J* = 8.1 Hz, 1H), 7.14 – 7.03 (m, 2H), 6.91 (d, *J* = 8.2 Hz, 1H), 4.81 (s, 1H). <sup>13</sup>C NMR (101 MHz, CDCl<sub>3</sub>) δ 153.2, 137.9, 137.8, 134.9, 133.9, 131.3, 130.5, 129.8, 128.6, 121.7, 114.4, 101.6. **HRMS (ESI):** [M+H]<sup>+</sup> calcd for C<sub>12</sub>H<sub>8</sub>Cl<sub>2</sub>IO 364.8991, found 364.8990.

**Chiral HPLC:** CHIRALPAK AD-H, 25 °C, iPrOH-hexanes 10.0/90.0, 1.0 mL/min, 254 nm. t<sub>R</sub>(minor) = 7.0 min, t<sub>R</sub>(major) = 7.4 min.

$$[\alpha]_D^{25} = -50.8^\circ \quad (c = 1.5, \text{CH}_2\text{Cl}_2)$$

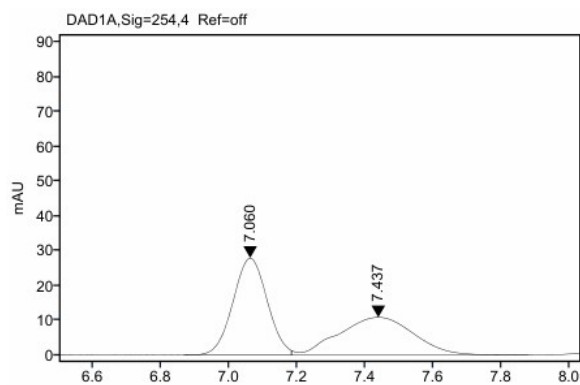

Signal: DAD1A, Sig=254,4 Ref=off

| RT [min] | Area   | Area% |
|----------|--------|-------|
| 7.060    | 194.72 | 54.00 |
| 7.437    | 165.90 | 46.00 |
| Sum      | 360.62 |       |

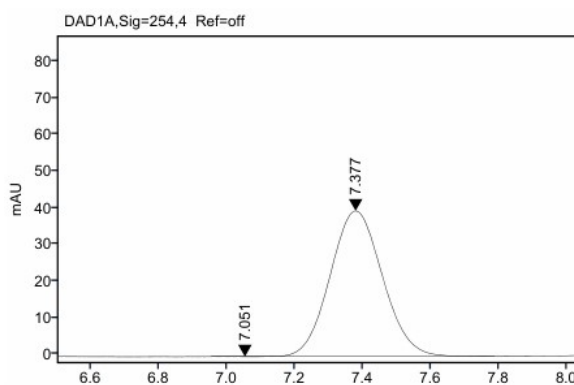

Signal: DAD1A, Sig=254,4 Ref=off

| RT [min] | Area   | Area% |
|----------|--------|-------|
| 7.051    | 0.02   | 0.01  |
| 7.377    | 427.55 | 99.99 |
| Sum      | 427.57 |       |

**(R)-4,4'-difluoro-2'-iodo-6,6'-dimethyl-[1,1'-biphenyl]-2-ol (3m)**

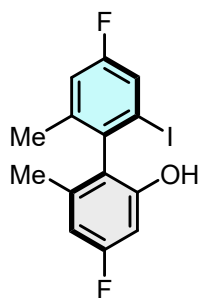

This compound was prepared according to the **General procedure B** from the reaction of **1h** (98.4 mg, 0.2 mmol).

67.7 mg, 94% yield, 85% ee, colorless oil.

**<sup>1</sup>H NMR (400 MHz, CDCl<sub>3</sub>)**  $\delta$  7.58 (dd,  $J = 7.8, 2.6$  Hz, 1H), 7.08 (dd,  $J = 9.0, 2.7$  Hz, 1H), 6.63 (dd,  $J = 9.3, 2.6$  Hz, 1H), 6.58 (dd,  $J = 9.8, 2.6$  Hz, 1H), 4.59 (s, 1H), 2.07 (s, 3H), 1.91 (s, 3H). **<sup>13</sup>C NMR (101 MHz, CDCl<sub>3</sub>)**  $\delta$  163.7 (d,  $J_{C-F} = 114.1$

Hz), 161.3 (d,  $J_{C-F} = 121.2$  Hz), 153.2 (d,  $J_{C-F} = 12.1$  Hz), 141.4 (d,  $J_{C-F} = 8.1$  Hz), 138.8 (d,  $J_{C-F} = 10.1$  Hz), 134.8 (d,  $J_{C-F} = 4.0$  Hz), 125.1 (d,  $J_{C-F} = 4.0$  Hz), 124.4 (d,  $J_{C-F} = 23.2$  Hz), 117.6 (d,  $J_{C-F} = 21.2$  Hz), 109.3 (d,  $J_{C-F} = 21.2$  Hz), 102.2 (d,  $J_{C-F} = 9.1$  Hz), 100.7 (d,  $J_{C-F} = 25.2$  Hz), 21.5, 19.7.

**HRMS (ESI):**  $[M+H]^+$  calcd for C<sub>14</sub>H<sub>12</sub>F<sub>2</sub>IO 360.9895, found 360.9899.

**Chiral HPLC:** CHIRALPAK OJ-H, 25 °C, iPrOH-hexanes 5.0/95.0, 1.0 mL/min, 254 nm.  $t_R$ (minor) = 10.2 min,  $t_R$ (major) = 19.0 min.

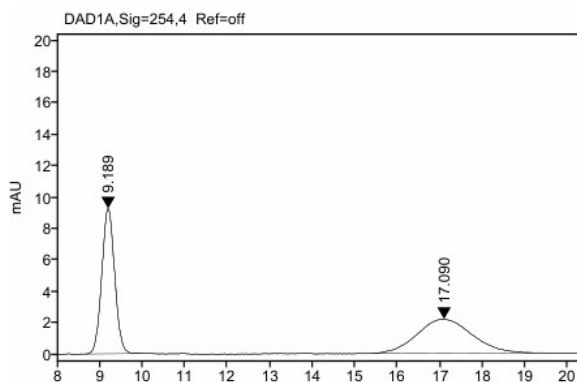

Signal: DAD1A,Sig=254,4 Ref=off

| RT [min] | Area   | Area% |
|----------|--------|-------|
| 9.189    | 195.05 | 50.27 |
| 17.090   | 192.98 | 49.73 |
| Sum      | 388.03 |       |

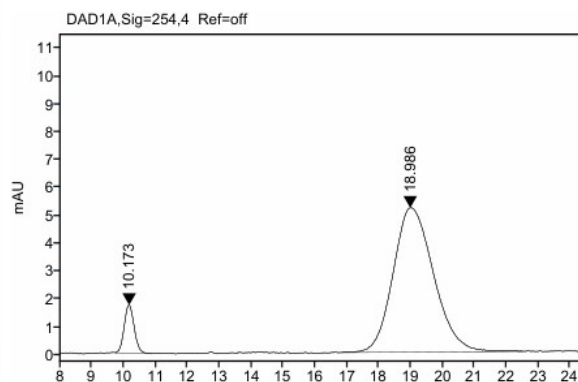

Signal: DAD1A,Sig=254,4 Ref=off

| RT [min] | Area   | Area% |
|----------|--------|-------|
| 10.173   | 37.53  | 7.59  |
| 18.986   | 456.72 | 92.41 |
| Sum      | 494.25 |       |

**(R)-2'-iodo-3',6'-dimethyl-6-(trifluoromethyl)-[1,1'-biphenyl]-2-ol (3n)**

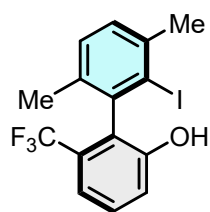

This compound was prepared according to the **General procedure B** from the reaction of **1i** (104.8 mg, 0.2 mmol).

75.2 mg, 96% yield, 78% ee, colorless oil.

<sup>1</sup>H NMR (400 MHz, CDCl<sub>3</sub>) δ 7.45 (t, *J* = 8.0 Hz, 1H), 7.40 – 7.34 (m, 1H), 7.26 – 7.17 (m, 3H), 4.76 (s, 1H), 2.49 (s, 3H), 2.03 (s, 3H). <sup>13</sup>C NMR (101 MHz, CDCl<sub>3</sub>) δ 152.8, 140.7, 137.0, 130.4, 130.1, 129.7, 129.2, 129.0, 128.7, 123.5 (q, *J*<sub>C-F</sub> = 275.73 Hz), 119.4, 118.7 (q, *J*<sub>C-F</sub> = 5.1 Hz), 108.29, 29.4, 21.0. **HRMS (ESI):** [M+H]<sup>+</sup> calcd for C<sub>15</sub>H<sub>13</sub>F<sub>3</sub>IO 392.9958, found 392.9951.

**Chiral HPLC:** CHIRALPAK OJ-H, 25 °C, iPrOH-hexanes 5.0/95.0, 1.0 mL/min, 254 nm. *t*<sub>R</sub>(minor) = 17.3 min, *t*<sub>R</sub>(major) = 20.2 min.

[α]<sub>D</sub><sup>25</sup> = -42.1° (c = 1.2, CH<sub>2</sub>Cl<sub>2</sub>)

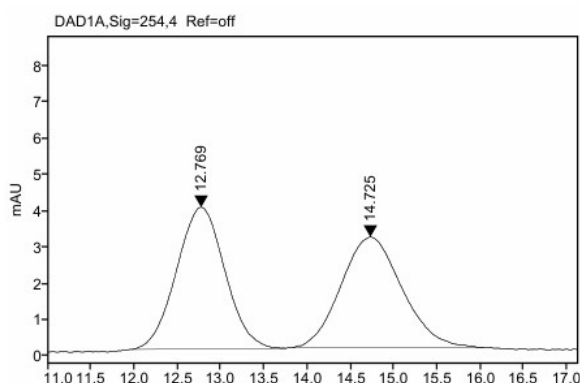

Signal: DAD1A,Sig=254,4 Ref=off

| RT [min] | Area   | Area% |
|----------|--------|-------|
| 12.769   | 151.39 | 50.23 |
| 14.725   | 150.01 | 49.77 |
| Sum      | 301.40 |       |

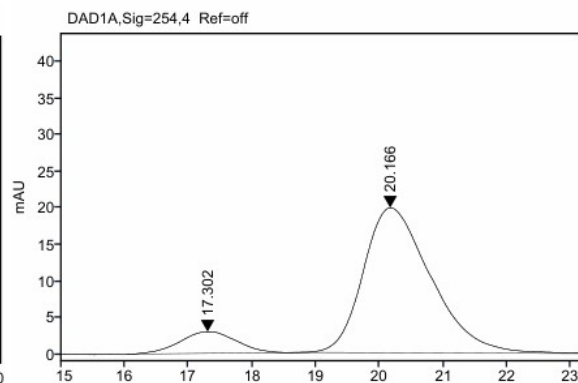

Signal: DAD1A,Sig=254,4 Ref=off

| RT [min] | Area    | Area% |
|----------|---------|-------|
| 17.302   | 181.33  | 11.03 |
| 20.166   | 1462.24 | 88.97 |
| Sum      | 1643.57 |       |

**(R)-2'-iodo-3',4',6,6'-tetramethyl-[1,1'-biphenyl]-2-ol (3o)<sup>2</sup>**

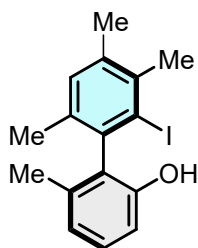

This compound was prepared according to the **General procedure B** from the reaction of **II** (96.8 mg, 0.2 mmol).

56.3 mg, 80% yield, 92% ee, colorless oil.

**<sup>1</sup>H NMR (400 MHz, CDCl<sub>3</sub>)**  $\delta$  7.21 (t,  $J$  = 7.9 Hz, 1H), 7.09 (s, 1H), 6.85 (dd,  $J$  = 12.9, 7.7 Hz, 2H), 4.45 (s, 1H), 2.49 (s, 3H), 2.39 (s, 3H), 1.99 (s, 3H), 1.92 (s, 3H).

**<sup>13</sup>C NMR (101 MHz, CDCl<sub>3</sub>)**  $\delta$  151.9, 138.7, 137.6, 137.4, 136.8, 136.1, 132.2, 131.7, 128.8, 122.1, 112.7, 110.6, 26.3, 21.8, 20.8, 19.6. **HRMS (ESI):** [M+Na]<sup>+</sup> calcd for C<sub>16</sub>H<sub>17</sub>INaO 375.0216 found 375.0210.

**Chiral HPLC:** CHIRALPAK OJ-H, 25 °C, iPrOH-hexanes 5.0/95.0, 1.0 mL/min, 254 nm.  $t_R$ (minor) = 14.0 min,  $t_R$ (major) = 15.6 min.

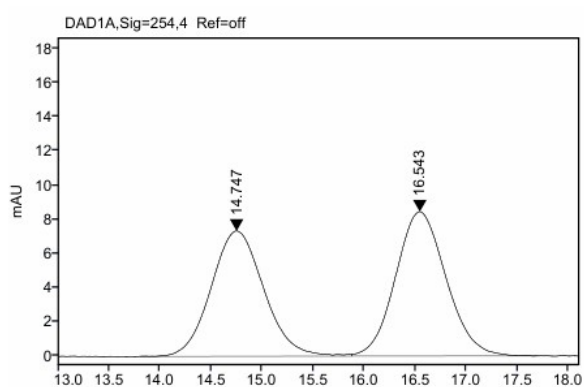

Signal: DAD1A,Sig=254,4 Ref=off

| RT [min] | Area   | Area% |
|----------|--------|-------|
| 14.747   | 263.21 | 47.54 |
| 16.543   | 290.46 | 52.46 |
| Sum      | 553.67 |       |

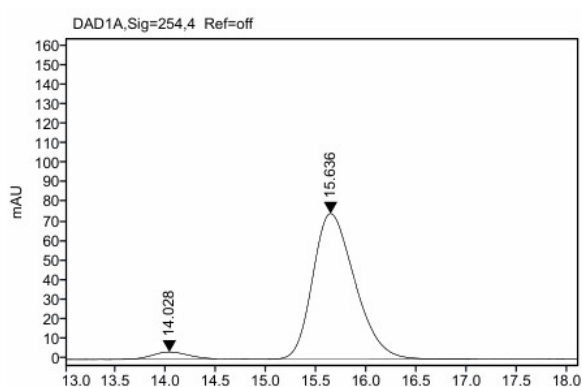

Signal: DAD1A,Sig=254,4 Ref=off

| RT [min] | Area    | Area% |
|----------|---------|-------|
| 14.028   | 89.58   | 3.94  |
| 15.636   | 2185.20 | 96.06 |
| Sum      | 2274.78 |       |

## 4. Gram-scale reaction and Control Experiment

### 4.1 Gram-scale reaction

To a 50 mL reaction tube with a stir bar was charged with CuSCN (41.5 mg, 10 mol%, 0.16 mmol), **L4** (175.0 mg, 11 mol%, 0.182 mmol) and cyclic diaryliodonium salts **1a** (1.50 g, 3.3 mmol). The tube was sealed with rubber septum, then evacuated and backfilled with nitrogen for three cycles, CD<sub>3</sub>OD (1.6 mL, 2.0 M) was added. The reaction mixture was stirred at appropriate temperature for 6 h. The reaction mixture was quenched with water (20.0 mL), and extracted with ethyl acetate (3 × 15.0 mL). The combined organic layers were washed with water, brine, dried over anhydrous Na<sub>2</sub>SO<sub>4</sub>, and concentrated under reduced pressure. The residue was purified by flash chromatography on silica gel to afford the desired product **2a** in 1.05g (93% yield, 96% ee).

### 4.2 Deuterium experiment

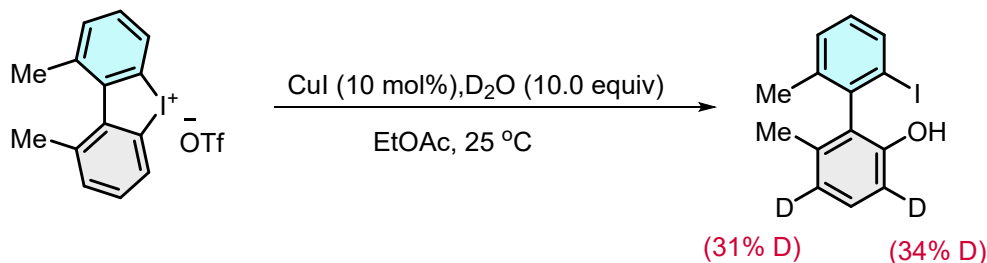

To a 5 mL reaction tube with a stir bar was charged with CuI (3.8 mg, 10 mol %, 0.01 mmol), D<sub>2</sub>O (36  $\mu$ L, 10.0 equiv, 2.0 mmol) and cyclic diaryliodonium salts **1** (0.2 mmol), The tube was sealed with rubber septum, then evacuated and backfilled with nitrogen for three cycles, dry EtOAc (1.0 mL, 0.2 M) was added. The reaction mixture was stirred at appreciate temperature for 6 h. The reaction mixture was quenched with water (10.0 mL), and extracted with ethyl acetate (3  $\times$  15.0 mL). The combined organic layers were washed with water, brine, dried over anhydrous Na<sub>2</sub>SO<sub>4</sub>, and concentrated under reduced pressure. The residue was purified by flash chromatography on silica gel to afford the desired product **4**.

#### 2'-iodo-6,6'-dimethyl-[1,1'-biphenyl]-3,5-*d*<sub>2</sub>-2-ol (**4**)

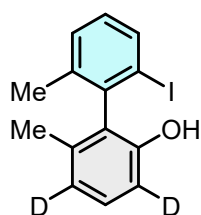

(31% D) (34% D) 60.6 mg, 93% yield.

<sup>1</sup>H NMR (400 MHz, DMSO-*d*<sub>6</sub>)  $\delta$  9.12 (d,  $J$  = 1.4 Hz, 1H), 7.74 (d,  $J$  = 7.8 Hz, 1H), 7.29 (d,  $J$  = 7.5 Hz, 1H), 7.11 – 7.05 (m, 1H), 6.97 (t,  $J$  = 7.7 Hz, 1H), 6.76 (d,  $J$  = 5.4 Hz, 0.66H), 6.74 (d,  $J$  = 4.7 Hz, 0.69H), 1.96 (s, 3H), 1.81 (s, 3H).

<sup>13</sup>C NMR (400 MHz, DMSO-*d*<sub>6</sub>)  $\delta$  154.2, 143.0, 138.4, 136.5, 130.9, 130.0, 129.3, 128.9, 128.8, 121.0, 113.5, 102.7, 21.5, 19.8.

#### 4.3 <sup>18</sup>O-Lable experiment

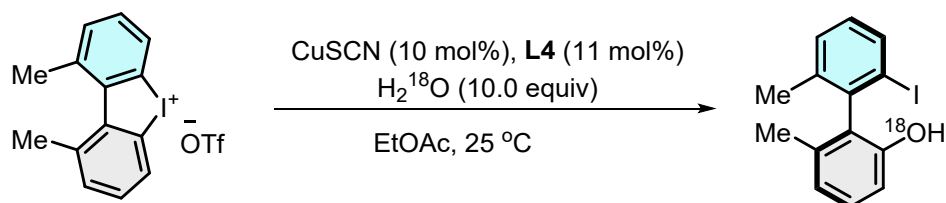

To a 5 mL reaction tube with a stir bar was charged with CuSCN (2.5 mg, 10 mol %, 0.01 mmol), **L4** (10.6 mg, 11 mol%, 0.011 mmol), H<sub>2</sub><sup>18</sup>O (36  $\mu$ L, 10.0 equiv, 2.0 mmol) and cyclic diaryliodonium salts **1** (0.2 mmol), The tube was sealed with rubber septum, then EtOAc (1.0 mL, 0.2 M) was added. The reaction mixture was stirred at appreciate temperature for 6 h. The reaction mixture was quenched

with water (10.0 mL), and extracted with ethyl acetate (3 × 15.0 mL). The combined organic layers were washed with water, brine, dried over anhydrous Na<sub>2</sub>SO<sub>4</sub>, and concentrated under reduced pressure. The residue was purified by flash chromatography on silica gel to afford the desired product **5**.

**(*R*)- 2'-iodo-6,6'-dimethyl-[1,1'-biphenyl]-2-ol-<sup>18</sup>O (**5**)<sup>2</sup>**

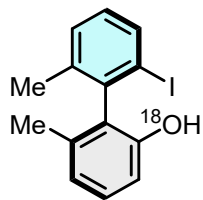

54.0 mg, 88% yield, 98% <sup>18</sup>O, 98% ee.

<sup>1</sup>H NMR (400 MHz, DMSO-*d*<sub>6</sub>) δ 9.13 (s, 1H), 7.74 (dd, *J* = 7.7, 1.0 Hz, 1H), 7.29 (dt, *J* = 7.5, 1.0 Hz, 1H), 7.08 (t, *J* = 7.8 Hz, 1H), 6.98 (t, *J* = 7.7 Hz, 1H), 6.76 (d, *J* = 4.1 Hz, 1H), 6.74 (d, *J* = 3.6 Hz, 1H), 1.95 (s, 3H), 1.81 (s, 3H).

<sup>13</sup>C NMR (400 MHz, DMSO-*d*<sub>6</sub>) δ 154.2, 143.0, 138.4, 136.5, 130.9, 130.0, 129.4, 128.9, 121.0, 113.5, 102.7, 21.5, 19.9. HRMS (ESI): [M+H]<sup>+</sup> calcd for C<sub>14</sub>H<sub>14</sub>I<sup>18</sup>O 327.0126, found 327.0129.

Chiral HPLC: CHIRALPAK OJ-H, 25 °C, iPrOH-hexanes 5.0/95.0, 1.0 mL/min, 254 nm. *t*<sub>R</sub>(minor) = 11.1 min, *t*<sub>R</sub>(major) = 14.1 min.

[α]<sub>D</sub><sup>25</sup> = +8.2° (c = 1.0, CH<sub>2</sub>Cl<sub>2</sub>)

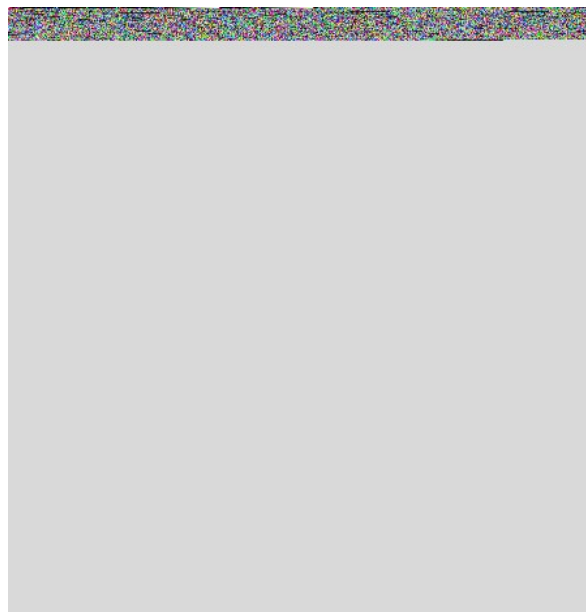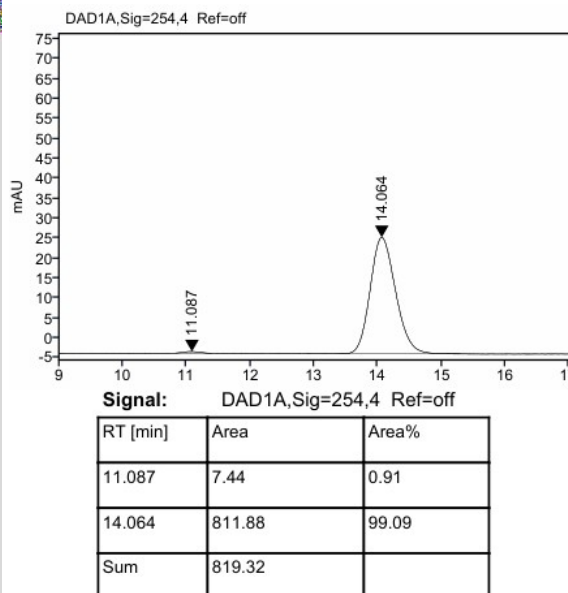

## 5. Further Applications

### 5.1 Suzuki Cross-Coupling Reaction

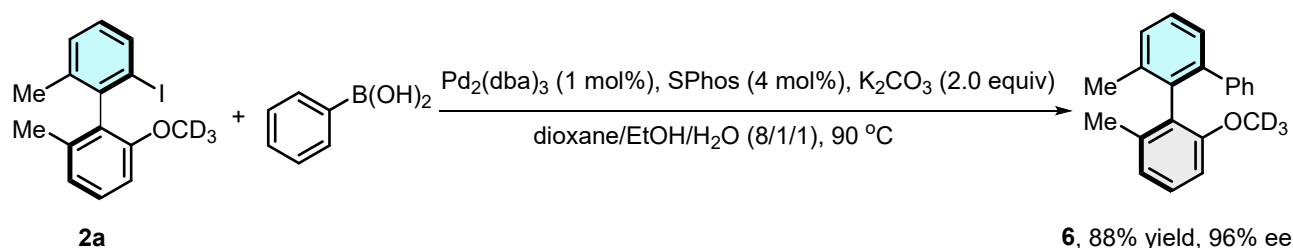

In a 20 mL seal tube equipped with a stir bar were added **2a** (68.2 mg, 0.2 mmol), phenylboronic acid (36.6 mg, 0.3 mmol, 1.5 equiv),  $\text{Pd}_2(\text{dba})_3$  (3.7 mg, 0.004 mmol, 2 mol %), S-Phos (3.3 mg, 0.008 mmol, 4 mol %), and  $\text{K}_3\text{PO}_4$  (127.4 mg, 0.6 mmol, 3.0 equiv) in dry Dioxane/EtOH/ $\text{H}_2\text{O}$  (8/1/1, 2.0 mL). The tube was sealed with a Teflon cap, and the mixture was stirred at 90 °C for 24 h. After consumption of the starting material, it was cooled to room temperature and diluted with EtOAc (20 mL). The organic layer was washed with water and brine, then dried over anhydrous  $\text{Na}_2\text{SO}_4$ . After filtration, the filtrate was concentrated under reduced pressure and the residue was purified by column chromatography on silica gel to afford **6**.

**(R)-2-(methoxy- $d_3$ )-6,6'-dimethyl-1,1':2',1''-terphenyl (6)**

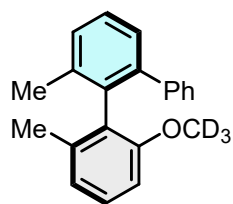

51.2 mg, 88% yield, 96% ee, white solid.

$^1\text{H NMR}$  (400 MHz,  $\text{CDCl}_3$ )  $\delta$  7.27 – 7.11 (m, 5H), 7.05 – 6.92 (m, 3H), 6.82 (d,  $J = 7.5$  Hz, 1H), 6.73 (d,  $J = 8.2$  Hz, 1H), 6.58 (dd,  $J = 8.0, 3.8$  Hz, 1H), 1.94 (s, 3H), 1.89 (s, 3H).  $^{13}\text{C NMR}$  (101 MHz,  $\text{CDCl}_3$ )  $\delta$  156.8, 137.6, 137.5, 136.6, 130.2, 129.6, 128.7, 127.8, 127.3, 127.2, 127.1, 126.2, 125.6, 122.2, 108.1, 107.4, 54.7-54.4 (m), 20.0, 19.5. **HRMS (ESI):**  $[\text{M}+\text{H}]^+$  calcd for  $\text{C}_{21}\text{H}_{18}\text{D}_3\text{O}$  292.1775, found 292.1782.

**Chiral HPLC:** CHIRALPAK OX-H, 25 °C, iPrOH-hexanes 0.5/99.5, 0.8 mL/min, 250 nm.  $t_{\text{R}}$ (major) = 15.9 min,  $t_{\text{R}}$ (minor) = 25.5 min.

$[\alpha]_D^{25} = -15.7^\circ$  ( $c = 1.0$ ,  $\text{CH}_2\text{Cl}_2$ )

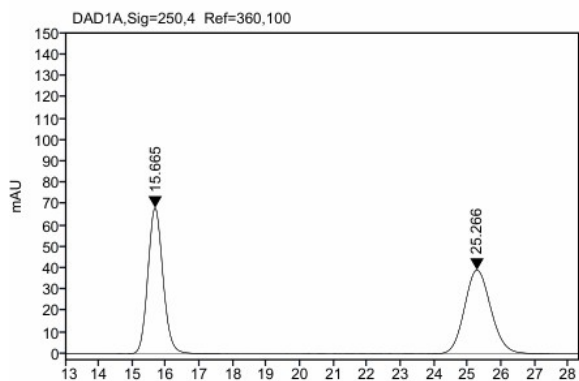

Signal: DAD1A,Sig=250,4 Ref=360,100

| RT [min] | Area    | Area% |
|----------|---------|-------|
| 15.665   | 2143.88 | 50.06 |
| 25.266   | 2138.45 | 49.94 |
| Sum      | 4282.33 |       |

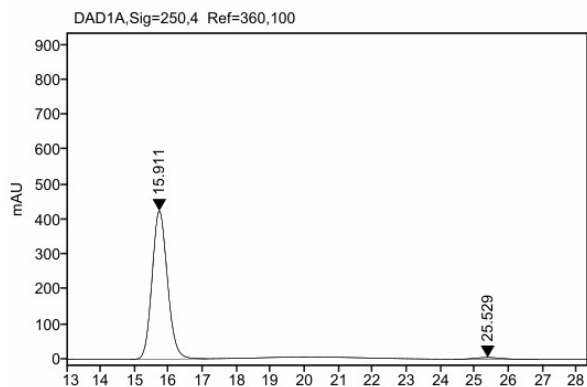

Signal: DAD1A,Sig=250,4 Ref=360,100

| RT [min] | Area     | Area% |
|----------|----------|-------|
| 15.911   | 13359.05 | 98.05 |
| 25.529   | 265.75   | 1.95  |
| Sum      | 13624.80 |       |

## 5.2 C–P Cross-Coupling Reaction

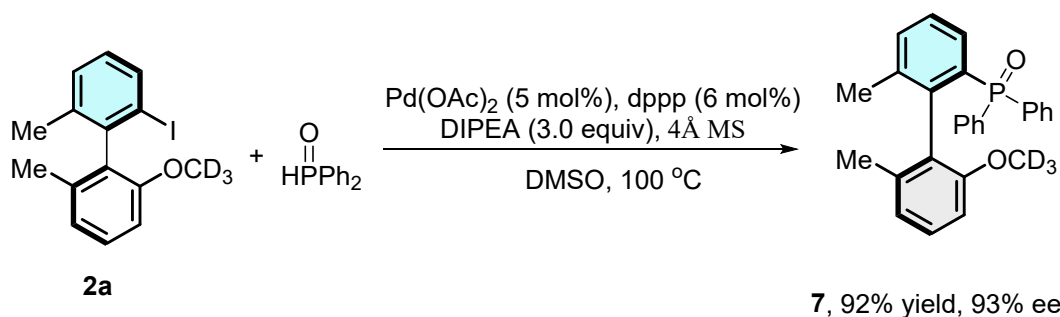

In a 20 mL seal tube equipped with a stir bar were added **2a** (68.2 mg, 0.2 mmol), diphenyl phosphine oxide (44.5 mg, 0.22 mmol, 1.1 equiv), Pd(OAc)<sub>2</sub> (2.2 mg, 0.01 mmol, 5 mol%), dppp (4.4 mg, 0.012 mmol, 6 mol%), 4Å MS (20 mg) in anhydrous DMSO (2.0 mL). Then DIPEA (105 μL, 0.6 mmol, 3.0 equiv) was added and stirred at 100 °C for 24 h. After consumption of the starting material, it was cooled to room temperature and diluted with EtOAc (20 mL). The organic layer was washed with water and brine, then dried over anhydrous Na<sub>2</sub>SO<sub>4</sub>. After filtration, the filtrate was concentrated under reduced pressure and the residue was purified by column chromatography on silica gel (PE/ethyl acetate = 2:1) to afford **7**.

### (*R*)-(2'-(methoxy-*d*<sub>3</sub>)-6,6'-dimethyl-[1,1'-biphenyl]-2-yl)diphenylphosphine oxide (**7**)

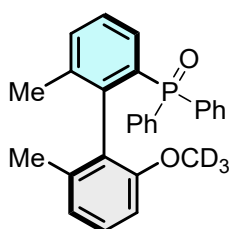

76.4 mg, 92% yield, 93% ee, yellow solid.

$^1\text{H NMR}$  (400 MHz,  $\text{CDCl}_3$ )  $\delta$  7.74 – 7.66 (m, 2H), 7.47 – 7.31 (m, 9H), 7.24 – 7.16 (m, 2H), 7.00 (t,  $J$  = 7.9 Hz, 1H), 6.70 (d,  $J$  = 7.6 Hz, 1H), 6.19 (d,  $J$  = 8.2 Hz, 1H), 1.92 (s, 3H), 1.89 (s, 3H).  $^{13}\text{C NMR}$  (101 MHz,  $\text{CDCl}_3$ )  $\delta$  155.6, 142.2, 142.2, 138.8, 138.5, 138.4, 134.2, 133.4, 133.4, 133.2, 133.1, 132.1, 132.0, 131.9, 131.7, 131.6, 131.3, 131.3, 131.2, 131.1, 131.1, 131.00, 130.4, 130.3, 128.5, 128.0, 127.9, 127.3, 127.2, 126.6, 126.5, 126.4, 121.9, 53.7-52.4 (m), 20.2, 19.6. **HRMS (ESI):**  $[\text{M}+\text{H}]^+$  calcd for  $\text{C}_{27}\text{H}_{23}\text{D}_3\text{O}_2\text{P}$  416.1853, found 416.1855.

**Chiral HPLC:** CHIRALPAK IA, 25 °C, iPrOH-hexanes 20.0/8.0, 1.0 mL/min, 250 nm.  $t_{\text{R}}$ (major) = 6.4 min,  $t_{\text{R}}$ (minor) = 8.2 min.

$[\alpha]_{\text{D}}^{25} = -25.0^\circ$  ( $c = 1.3$ ,  $\text{CH}_2\text{Cl}_2$ )

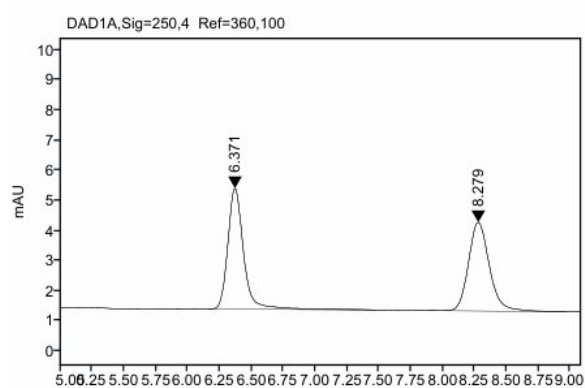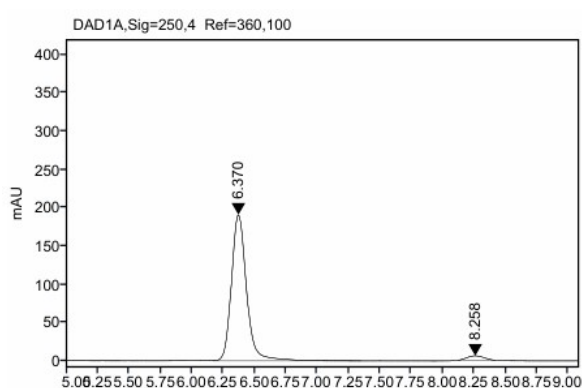

### 5.3 Sonogashira Cross-Coupling Reaction

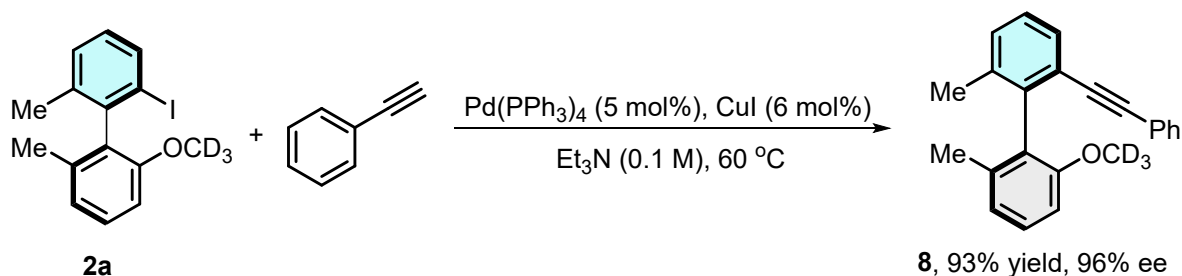

In a 20 mL seal tube equipped with a stir bar were added **2a** (68.2 mg, 0.2 mmol),  $\text{Pd(PPh}_3)_4$  (11.6 mg, 0.010 mmol, 5 mol%), and  $\text{CuI}$  (2.1 mg, 0.012 mmol, 6 mol%) in  $\text{Et}_3\text{N}$  (2.0 mL). Then phenylacetylene (44.0  $\mu\text{L}$ , 0.40 mmol, 2.0 equiv) was added, and the reaction was stirred at 60 °C for 24 h. After consumption of the starting material, it was cooled to room temperature and diluted with  $\text{EtOAc}$  (20 mL). The organic layer was washed with water and brine, then dried over anhydrous  $\text{Na}_2\text{SO}_4$ . After filtration, the filtrate was concentrated under reduced pressure and the residue was purified by column chromatography on silica gel to afford **8**.

**(R)-2-(methoxy-*d*<sub>3</sub>)-2',6-dimethyl-6'-(phenylethynyl)-1,1'-biphenyl (8)**

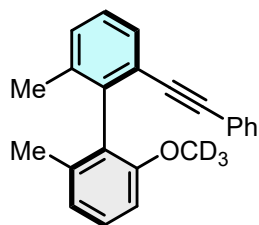

58.6 mg, 93% yield, 96% ee, white solid.

<sup>1</sup>H NMR (400 MHz, CDCl<sub>3</sub>) δ 7.45 (dd, *J* = 6.9, 2.1 Hz, 1H), 7.29 – 7.21 (m, 3H), 7.21 – 7.14 (m, 3H), 7.06 – 7.00 (m, 2H), 6.93 (d, *J* = 7.6 Hz, 1H), 6.82 (d, *J* = 8.2 Hz, 1H), 2.04 (s, 3H), 2.00 (s, 3H). <sup>13</sup>C NMR (101 MHz, CDCl<sub>3</sub>) δ 156.9, 140.6, 137.8, 137.0, 131.3, 129.7, 129.0, 128.9, 128.1, 128.0, 127.6, 126.9, 123.6, 123.3, 122.2, 108.3, 91.3, 89.1, 56.4-54.4 (m), 19.9, 19.5. HRMS (ESI): [M+H]<sup>+</sup> calcd for C<sub>23</sub>H<sub>18</sub>D<sub>3</sub>O 316.1775, found 316.1776.

**Chiral HPLC:** CHIRALPAK OX-H, 25 °C, iPrOH-hexanes 0.2/99.8, 0.8 mL/min, 250 nm. *t*<sub>R</sub>(minor) = 25.7 min, *t*<sub>R</sub>(major) = 27.7 min.

[α]<sub>D</sub><sup>25</sup> = -20.5° (c = 1.1, CH<sub>2</sub>Cl<sub>2</sub>)

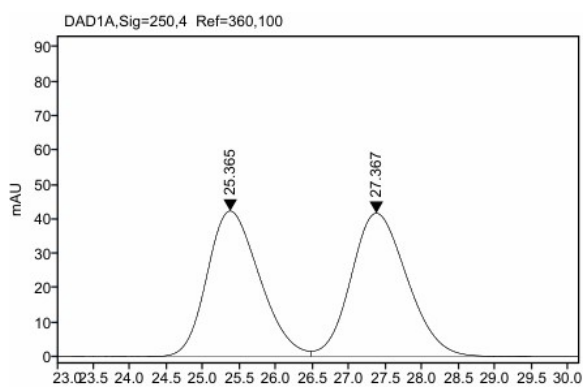

| RT [min] | Area    | Area% |
|----------|---------|-------|
| 25.365   | 2113.97 | 48.70 |
| 27.367   | 2226.89 | 51.30 |
| Sum      | 4340.86 |       |

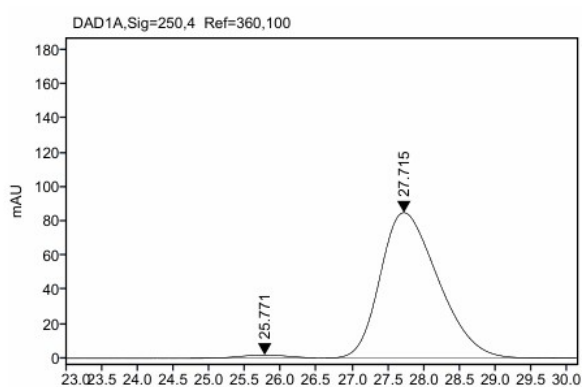

| RT [min] | Area    | Area% |
|----------|---------|-------|
| 25.771   | 83.80   | 1.72  |
| 27.715   | 4778.53 | 98.28 |
| Sum      | 4862.34 |       |

## 6. References

1. (a) Zhu, K.; Xu, K.; Fang, Q.; Wang, Y.; Tang, B.; Zhang, F. Enantioselective Synthesis of Axially Chiral Biaryls via Cu-Catalyzed Acyloxylation of Cyclic Diaryliodonium Salts. *ACS Catal.* **2019**, *9*, 4951–4957. (b) Zhao, K.; Duan, L.; Xu, S.; Jiang, J.; Fu, Y.; Gu, Z. Enhanced Reactivity by Torsional Strain of Cyclic Diaryliodonium in CuCatalyzed Enantioselective Ring-Opening Reaction. *Chem* **2018**, *4*, 599–612. (c) Liu, X.; Ye, Z.; Liu, J.; Wu, Y.; Zhang, F. Asymmetric Synthesis of Biaryl Sulfilimines Bearing Multiple Chiral Elements Involving Cyclic Diaryliodoniums. *Org. Lett.* **2025**, *27*, 6695–6701.
2. Xu, H.; Huang, Y.; Hong, B.; Gu, Z. Enantioselective Preparation of <sup>18</sup>O-Labeled Phenolic Biaryl Atropisomers via Cu-Catalyzed Ring-Opening of Cyclic Diaryliodoniums. *Adv. Synth. Catal.* **2025**, *367*, e70031.

## 7. Copies of NMR Spectra

**2a**,  $^1\text{H}$  NMR (400 MHz,  $\text{CDCl}_3$ );  $^{13}\text{C}$  NMR (101 MHz,  $\text{CDCl}_3$ )

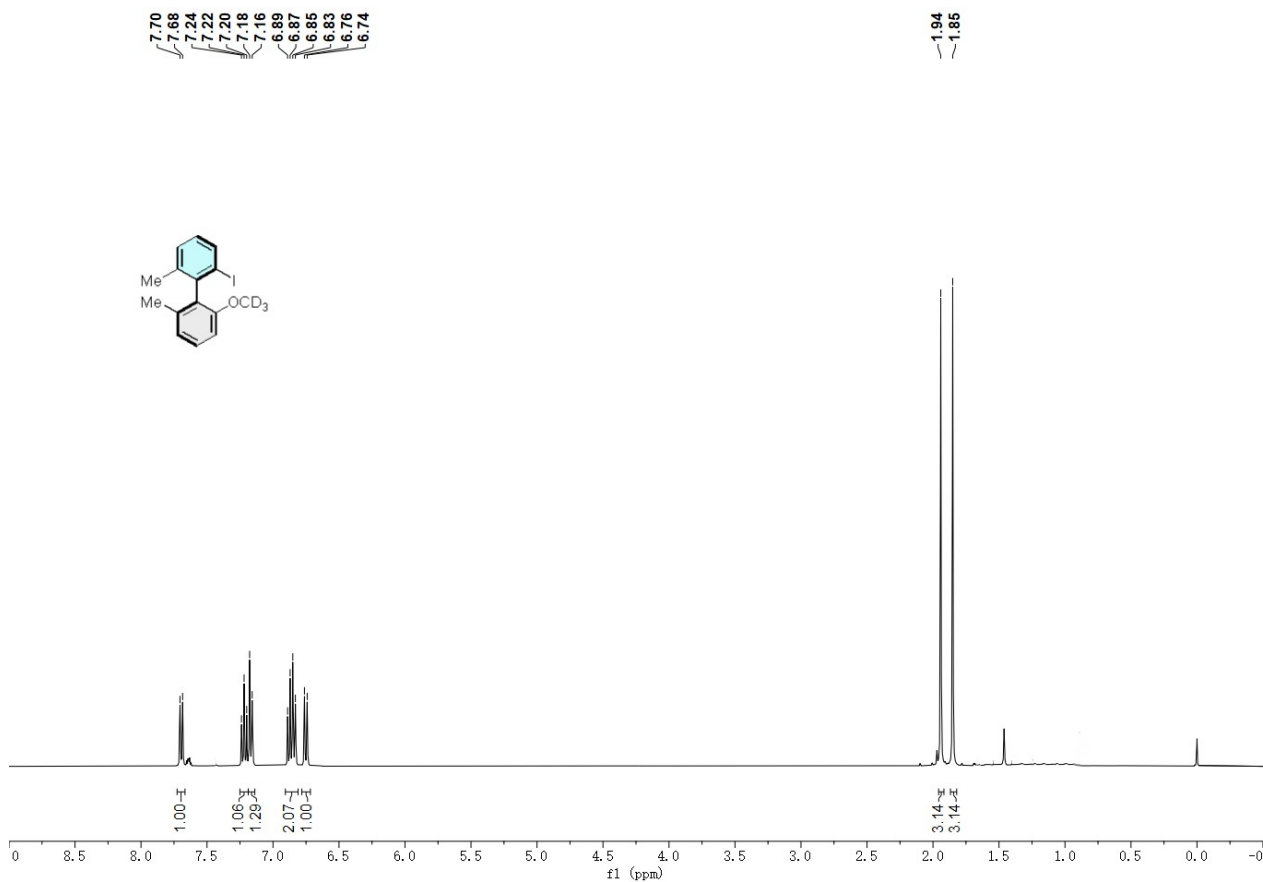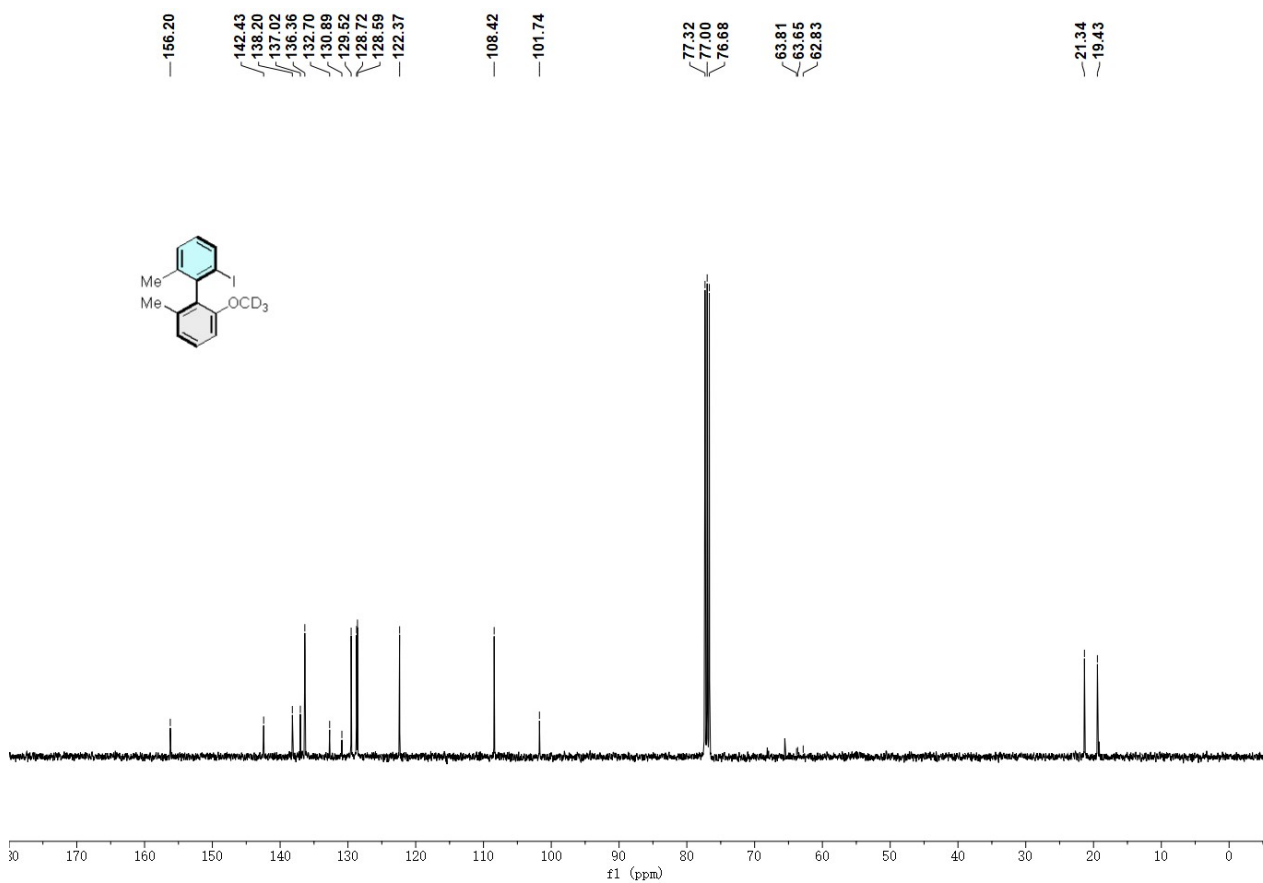

**2b, <sup>1</sup>H NMR (400 MHz, CDCl<sub>3</sub>); <sup>13</sup>C NMR (101 MHz, CDCl<sub>3</sub>)**

7.78  
7.78  
7.76  
7.76  
7.41  
7.39  
7.37  
7.25  
7.25  
7.24  
7.23  
7.23  
7.23  
7.03  
7.03  
7.01  
7.01  
6.96  
6.94  
6.92  
6.82  
6.82  
6.80  
6.80

2.45  
2.44  
2.42  
2.40  
2.38  
2.04  
1.22  
1.20  
1.08  
1.06

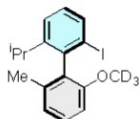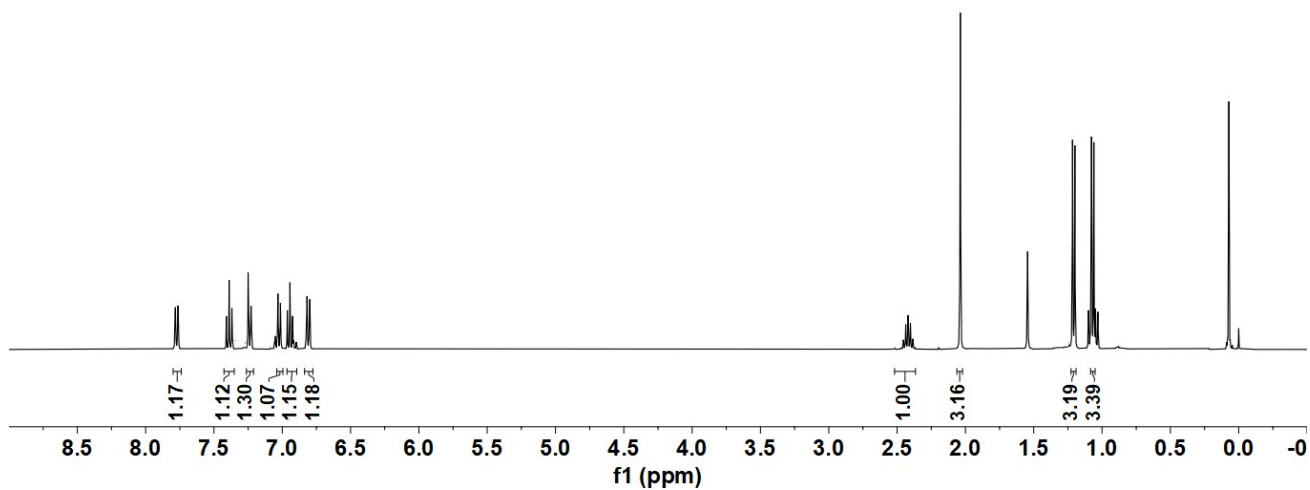

155.93  
147.53  
142.28  
138.62  
136.35  
129.43  
129.07  
128.61  
125.12  
117.94  
108.17  
102.61

77.32  
77.00  
76.68  
55.81  
55.32  
54.82  
30.17  
24.00  
23.93  
21.74

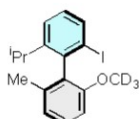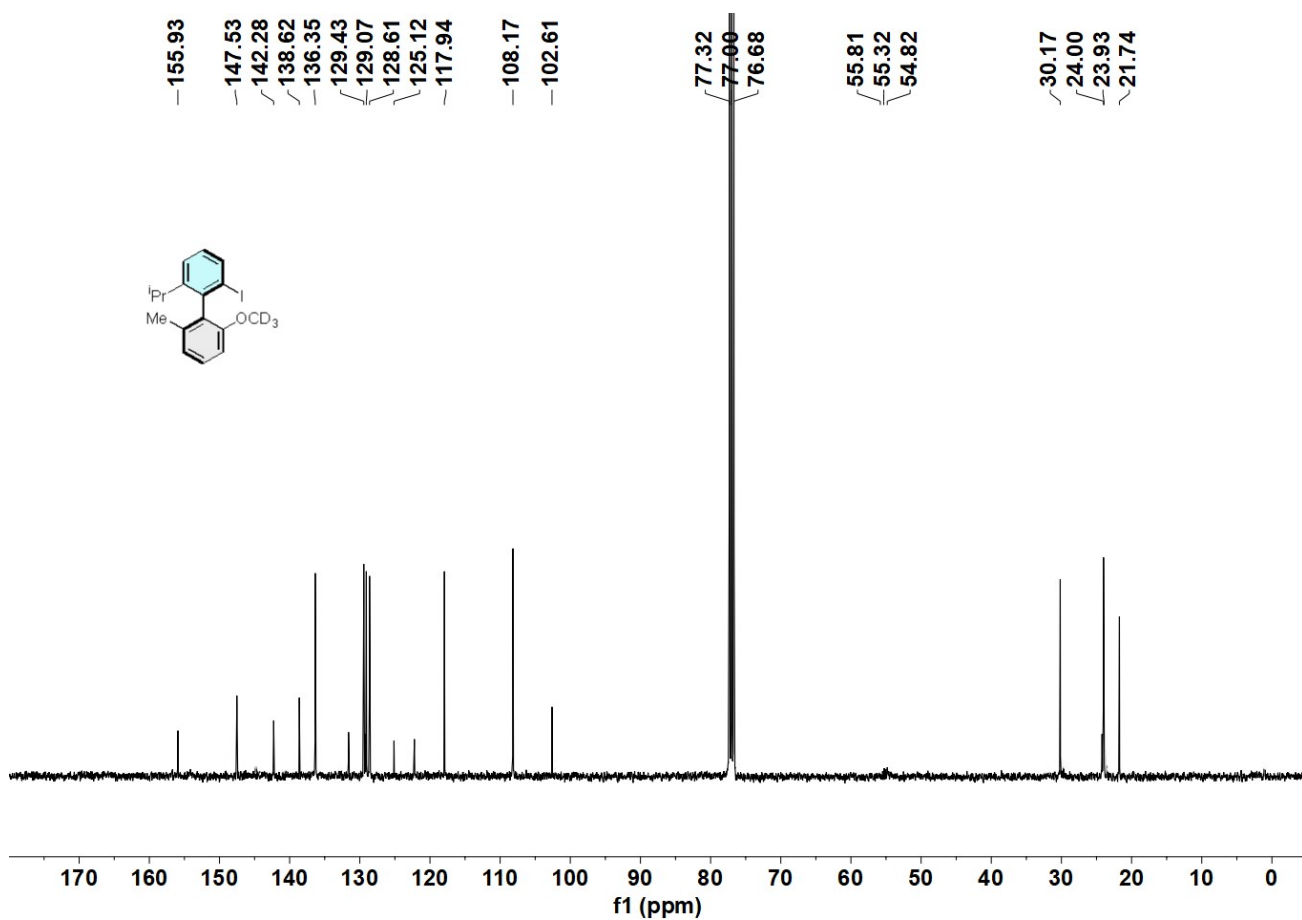

2c, <sup>1</sup>H NMR (400 MHz, CDCl<sub>3</sub>); <sup>13</sup>C NMR (101 MHz, CDCl<sub>3</sub>)

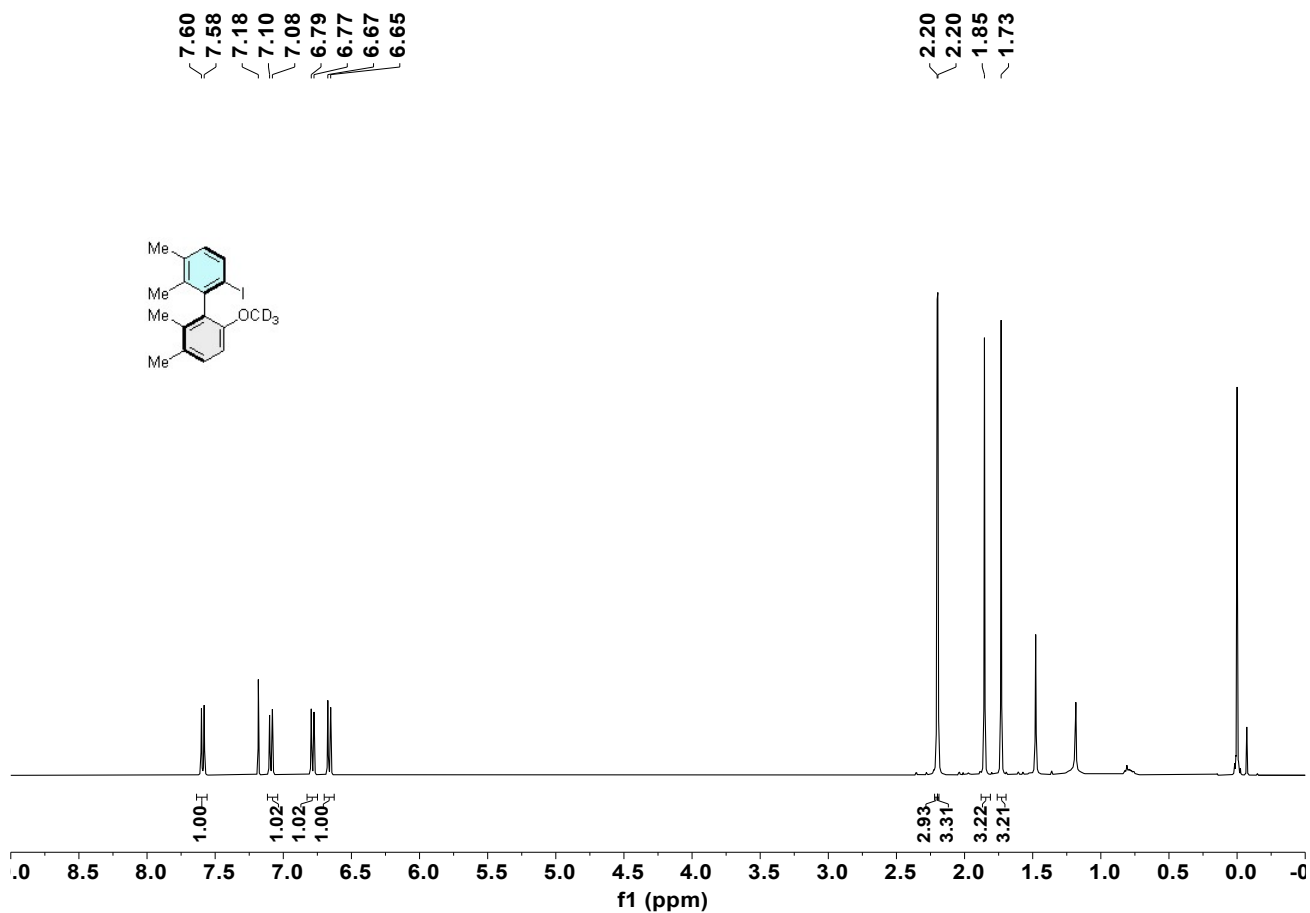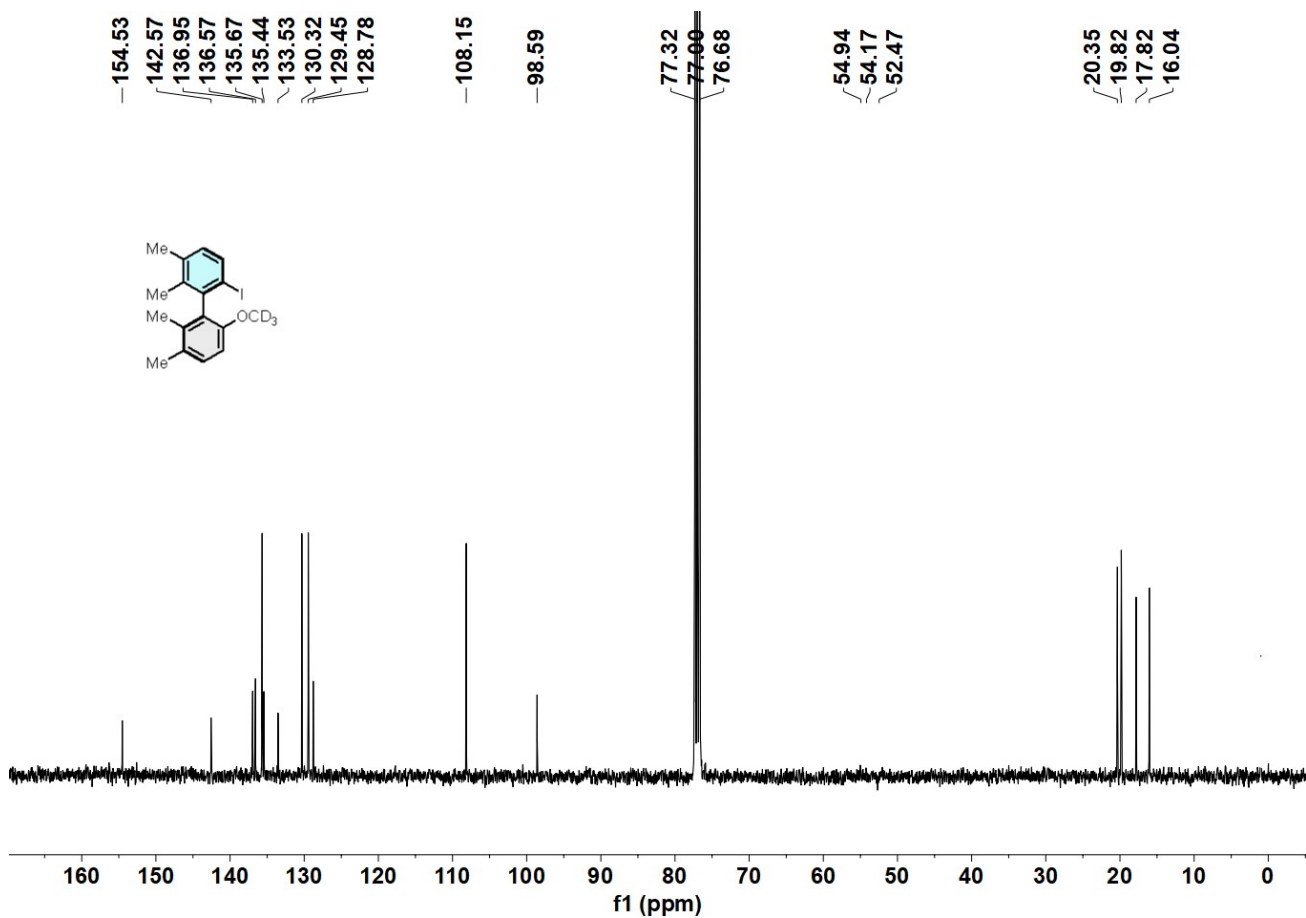

**2d,  $^1\text{H}$  NMR (400 MHz,  $\text{CDCl}_3$ );  $^{13}\text{C}$  NMR (101 MHz,  $\text{CDCl}_3$ )**

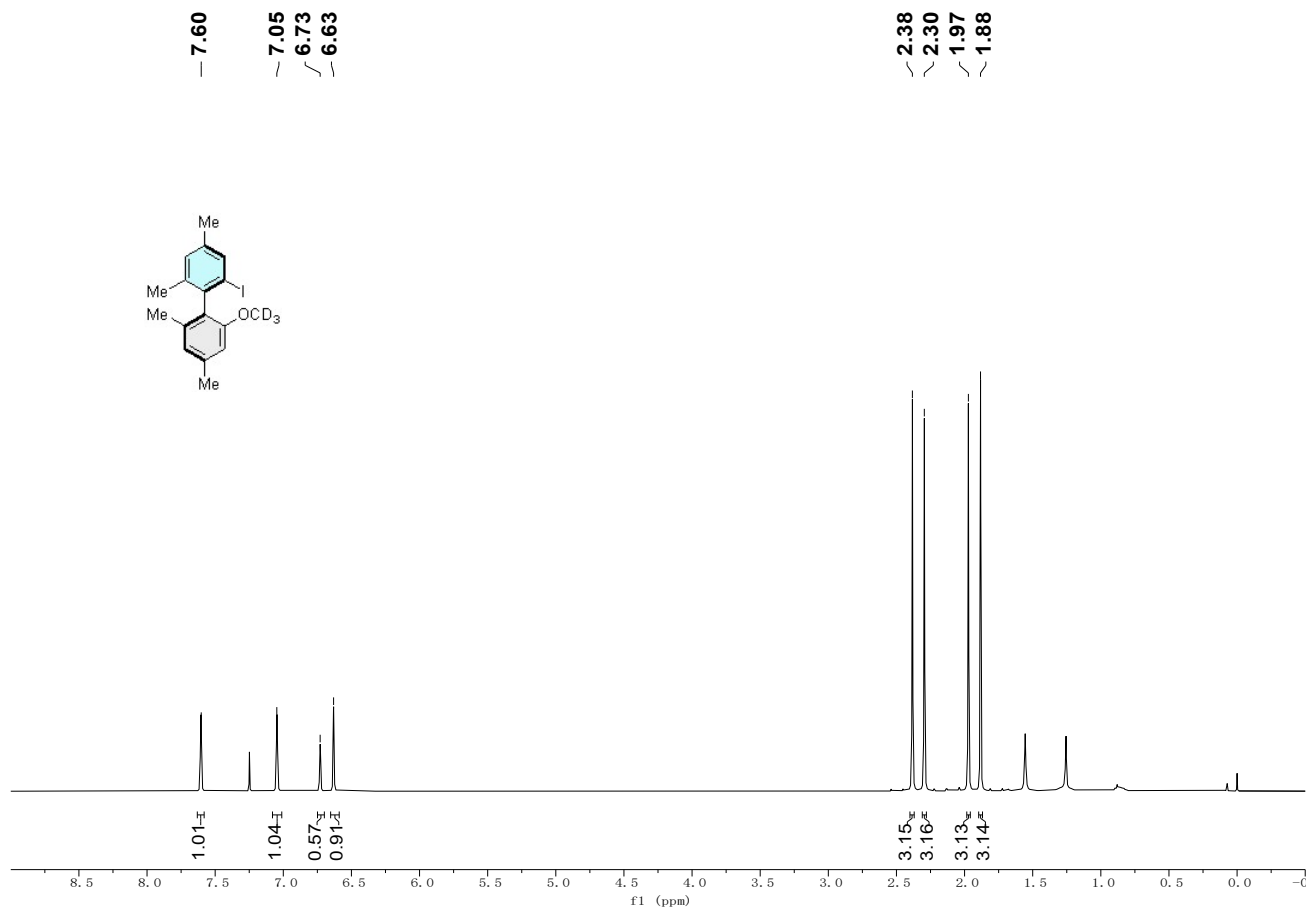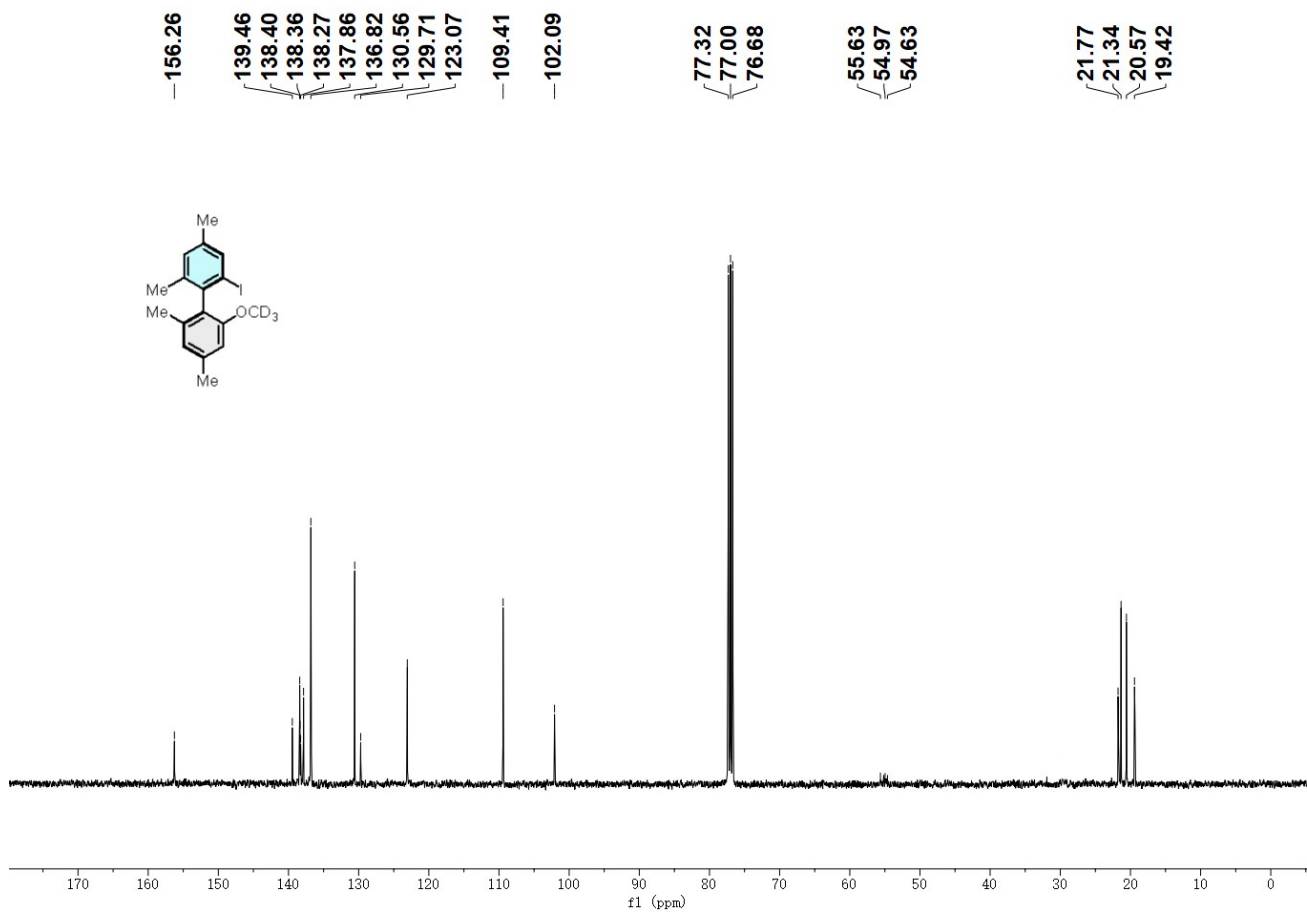

2e, <sup>1</sup>H NMR (400 MHz, CDCl<sub>3</sub>); <sup>13</sup>C NMR (101 MHz, CDCl<sub>3</sub>)

8.06  
8.05  
8.03  
8.02  
7.90  
7.90  
7.90  
7.88  
7.88  
7.88  
7.67  
7.65  
7.48  
7.48  
7.46  
7.46  
7.44  
7.44  
7.44  
7.36  
7.36  
7.34  
7.34  
7.34  
7.32  
7.32  
7.27  
7.26  
7.26  
7.25  
7.25  
7.24  
7.24  
7.23  
7.23  
7.22  
7.22  
7.21  
7.19  
7.19  
7.17  
6.97  
6.97  
6.95

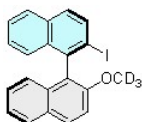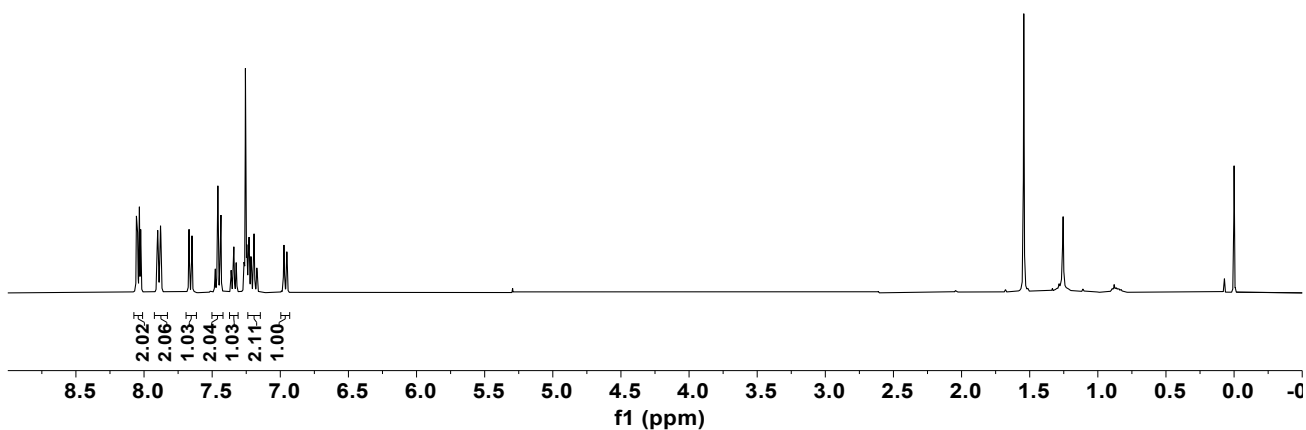

154.20  
139.77  
135.61  
133.80  
132.91  
130.12  
129.06  
129.01  
128.07  
127.99  
126.83  
126.79  
126.18  
125.70  
124.64  
123.76  
113.79  
100.49  
77.32  
77.00  
76.68  
61.03  
60.82  
60.11

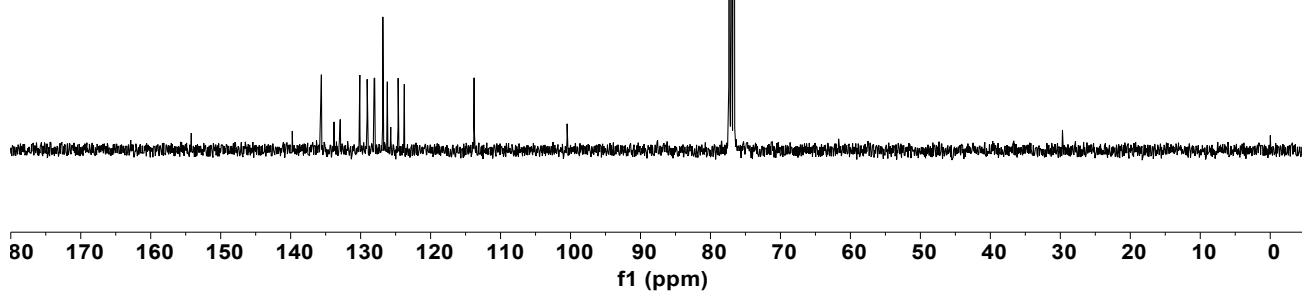

2f,  $^1\text{H}$  NMR (400 MHz,  $\text{CDCl}_3$ );  $^{13}\text{C}$  NMR (101 MHz,  $\text{CDCl}_3$ )

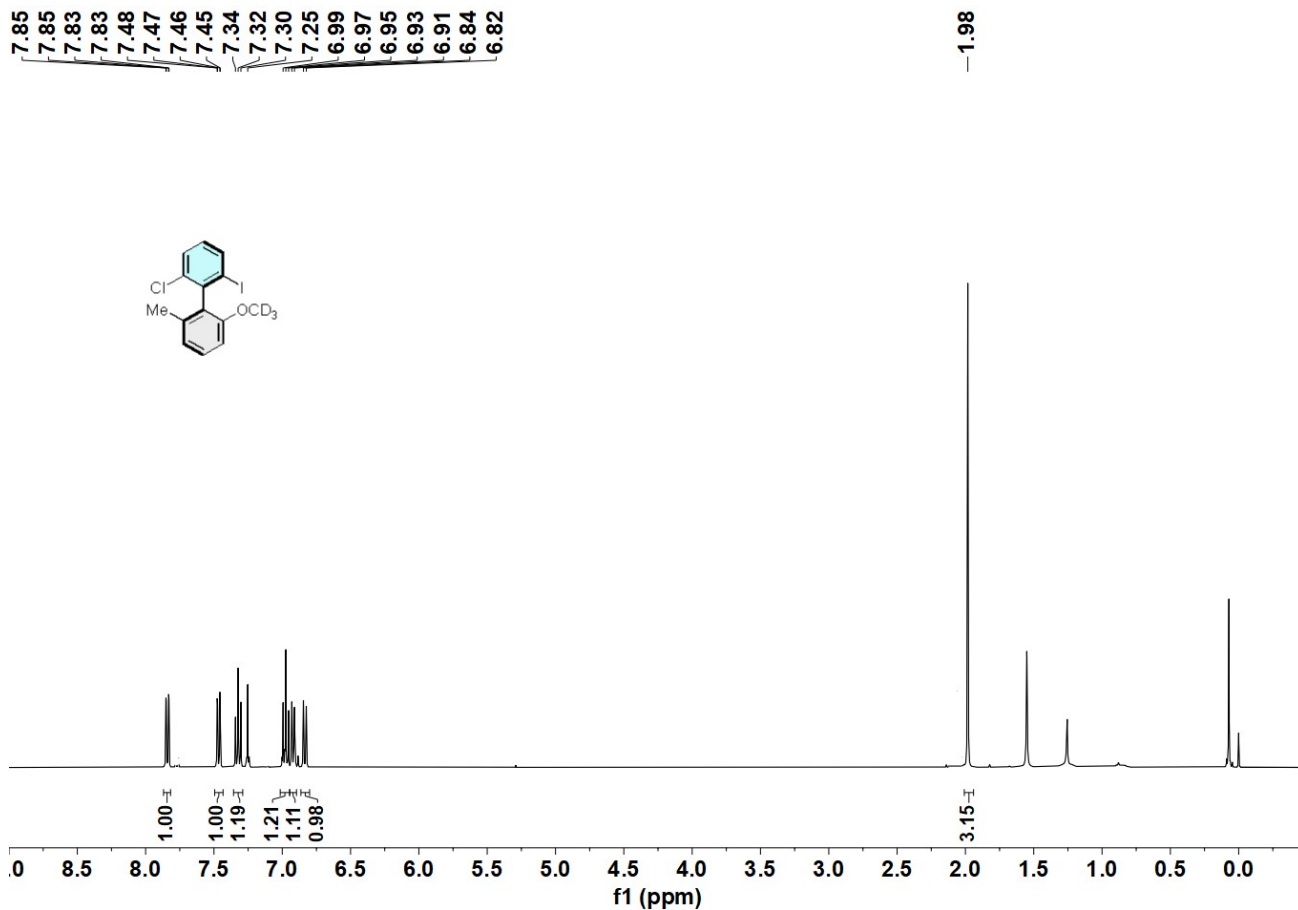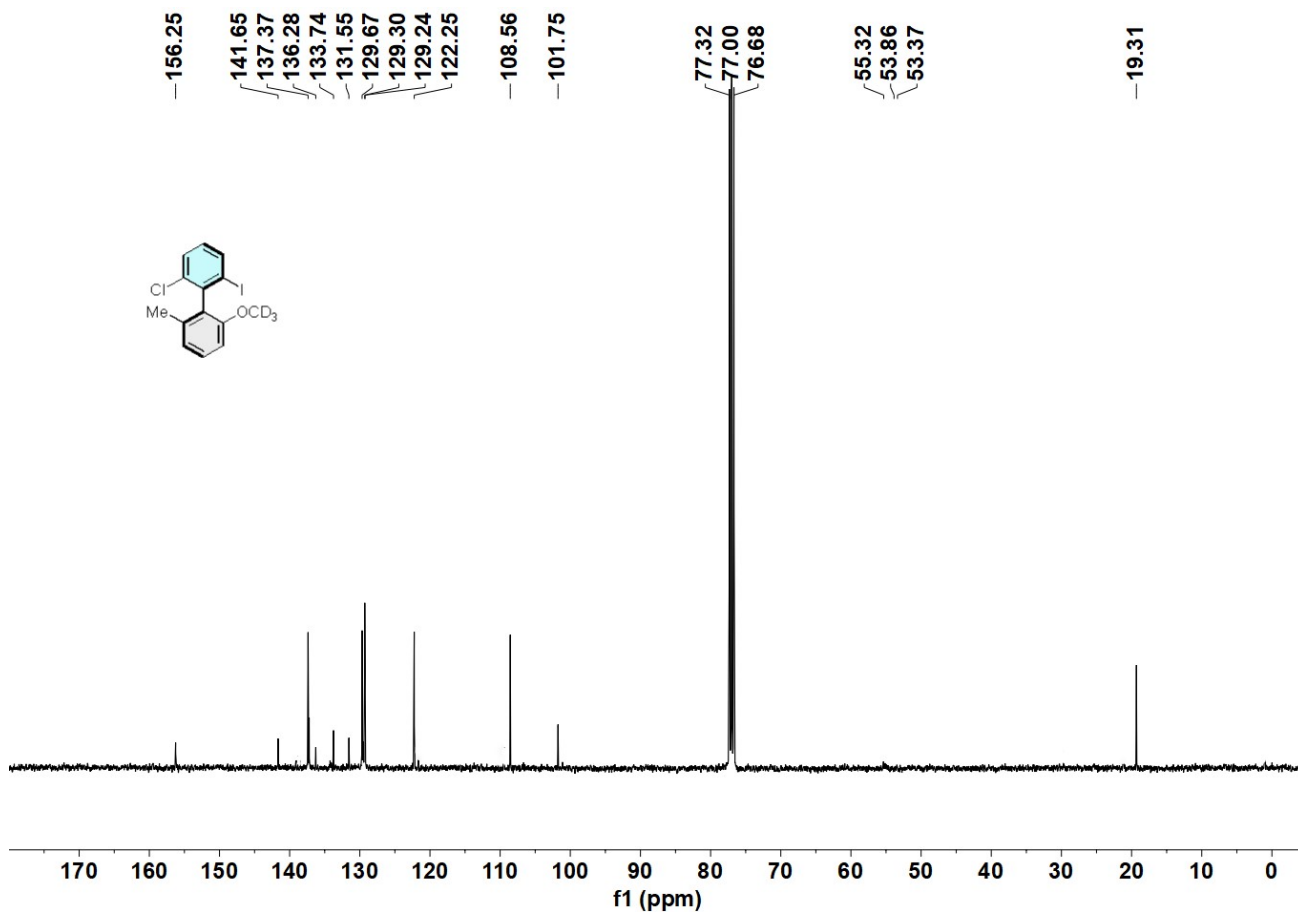

2g, <sup>1</sup>H NMR (400 MHz, CDCl<sub>3</sub>); <sup>13</sup>C NMR (101 MHz, CDCl<sub>3</sub>)

7.85  
7.85  
7.83  
7.83  
7.48  
7.48  
7.46  
7.46  
7.37  
7.35  
7.33  
7.25  
7.14  
7.13  
7.12  
7.11  
7.03  
7.01  
6.99  
6.92  
6.91  
6.90  
6.89

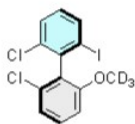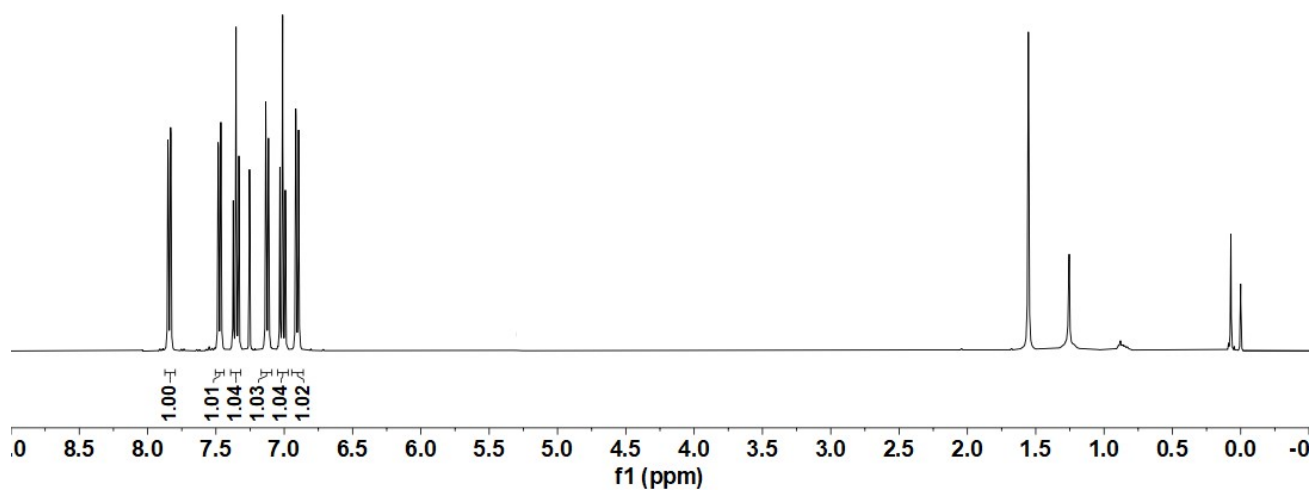

157.55  
139.91  
137.28  
134.22  
134.00  
130.68  
130.20  
129.68  
129.16  
121.55  
109.53  
101.14  
77.32  
77.00  
76.68  
58.11  
57.07  
55.73

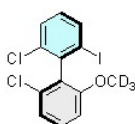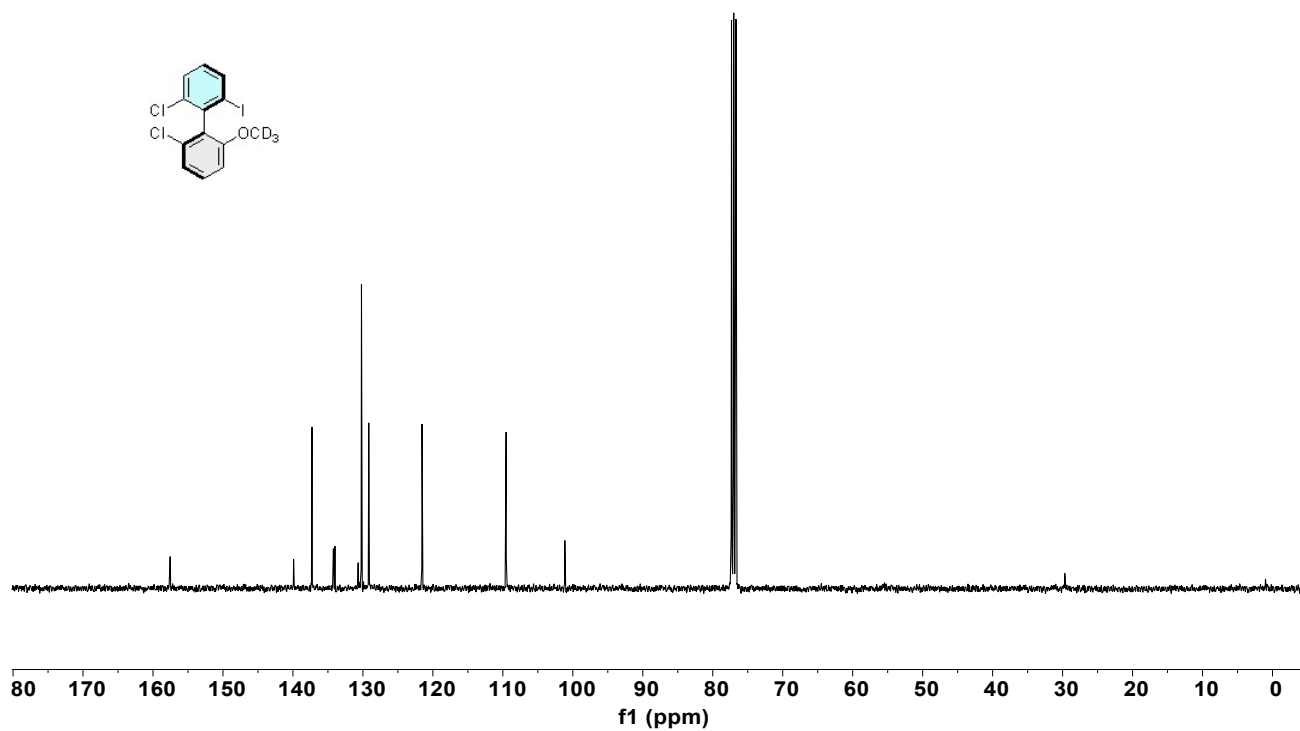

2h, <sup>1</sup>H NMR (400 MHz, CDCl<sub>3</sub>); <sup>13</sup>C NMR (101 MHz, CDCl<sub>3</sub>)

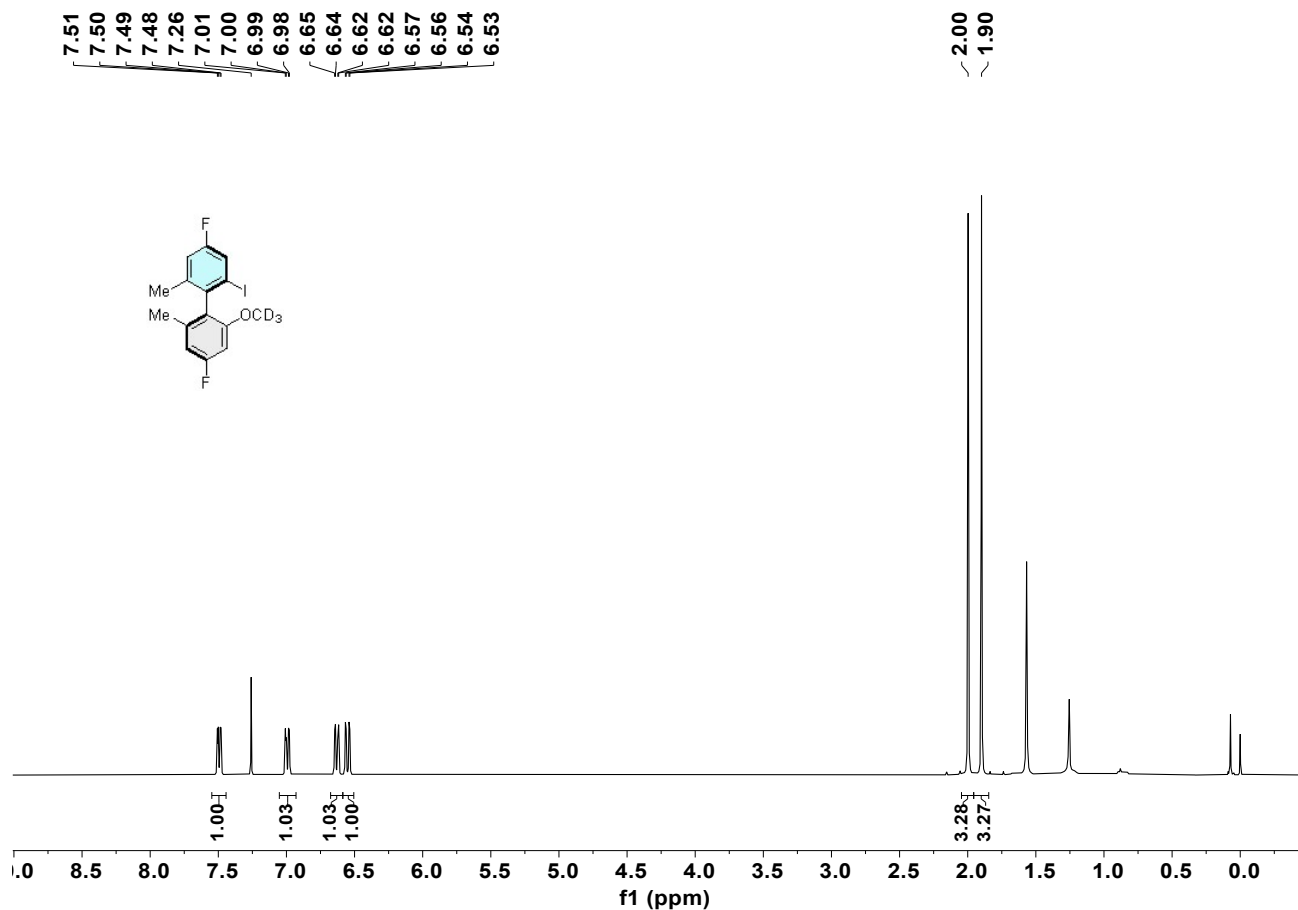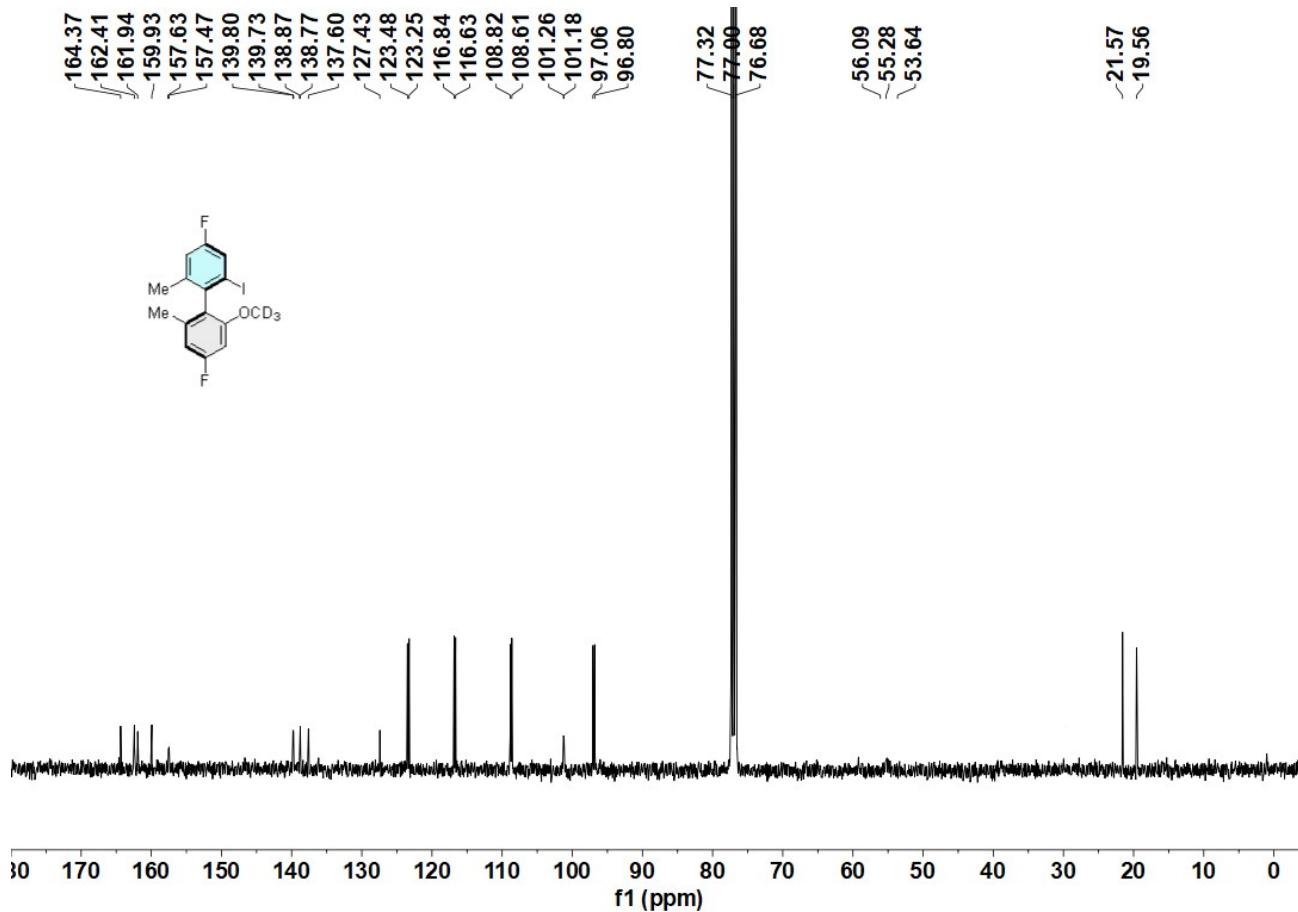

2i, <sup>1</sup>H NMR (400 MHz, CDCl<sub>3</sub>); <sup>13</sup>C NMR (101 MHz, CDCl<sub>3</sub>)

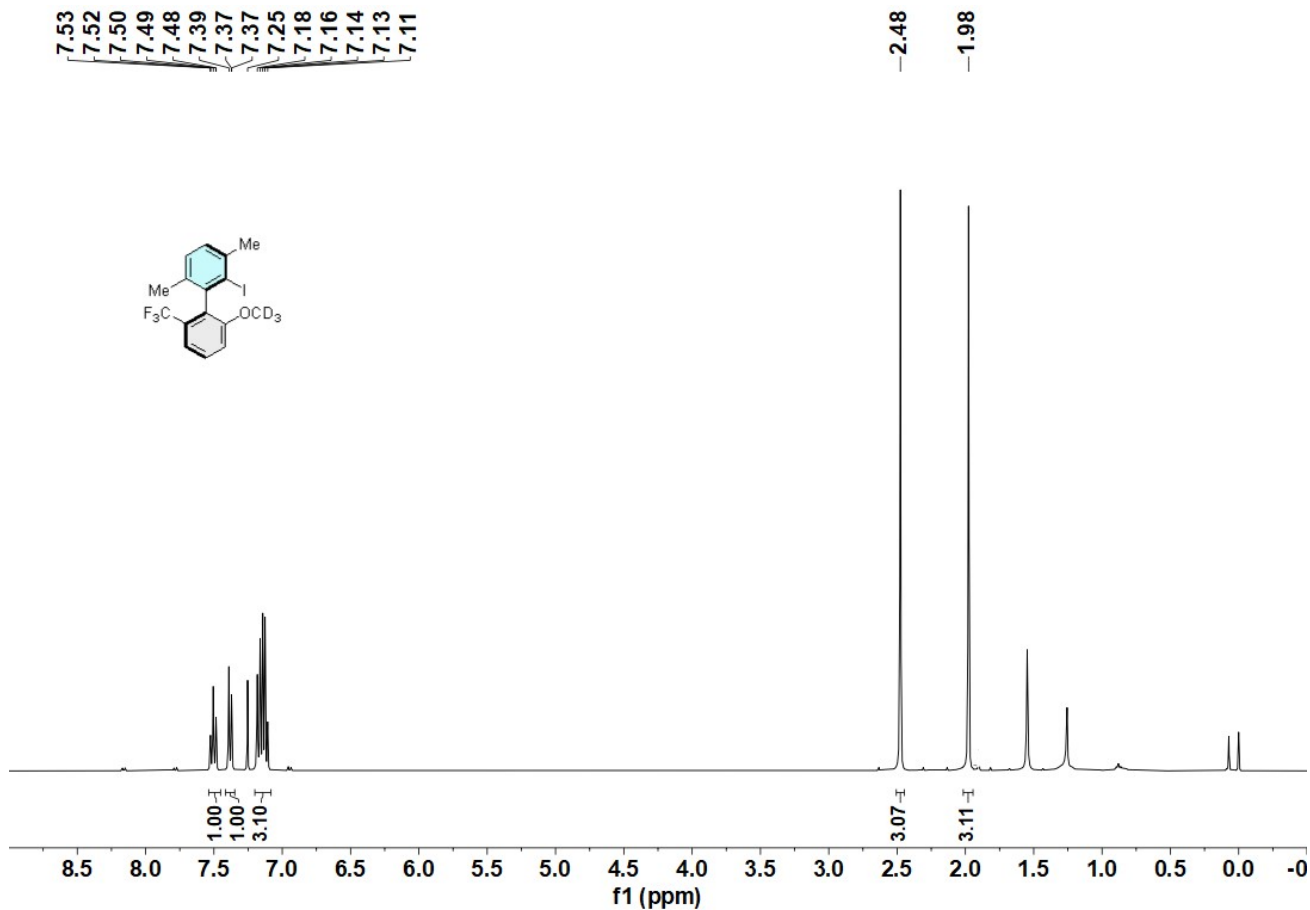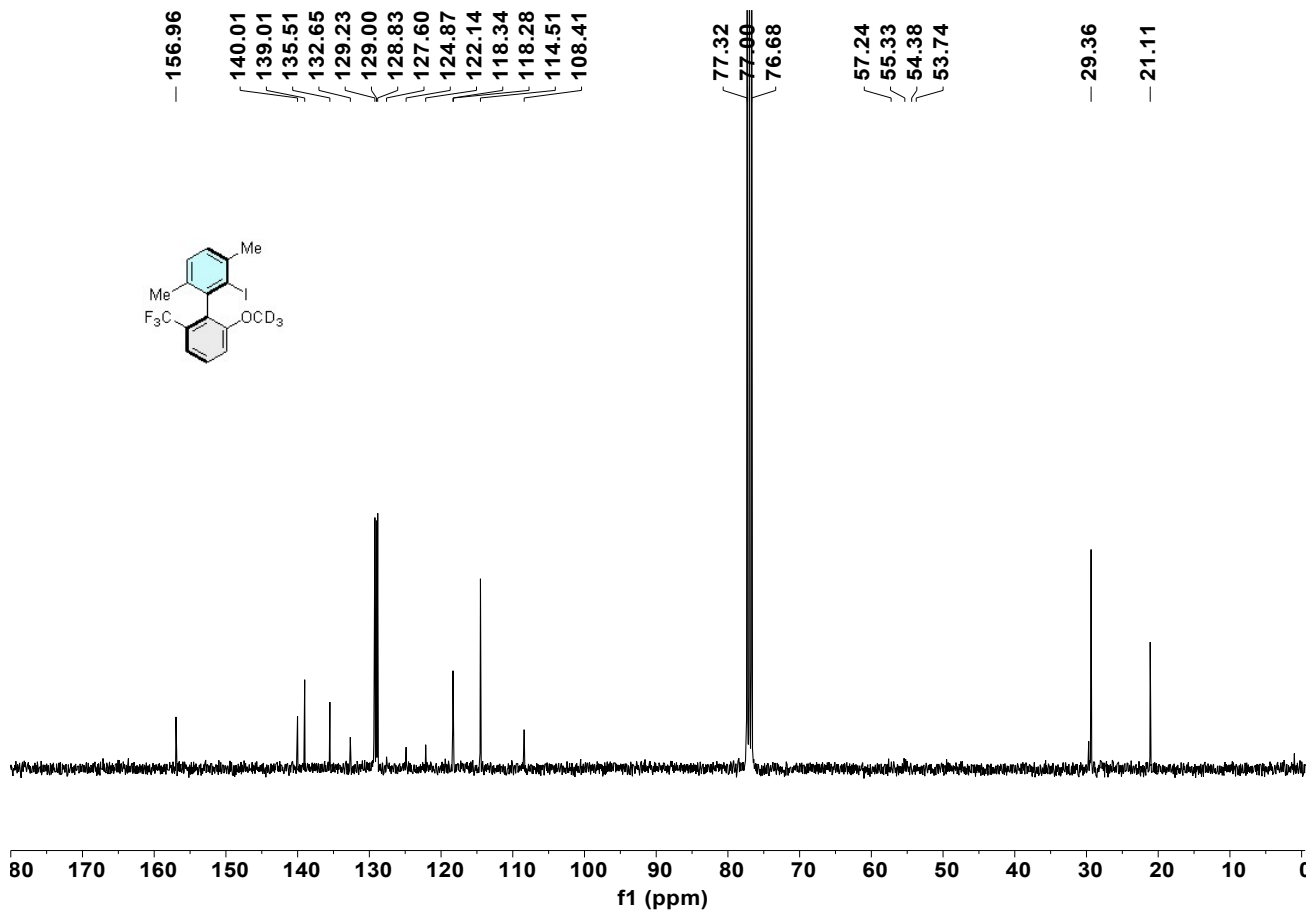

2j,  $^1\text{H}$  NMR (400 MHz,  $\text{CDCl}_3$ );  $^{13}\text{C}$  NMR (101 MHz,  $\text{CDCl}_3$ )

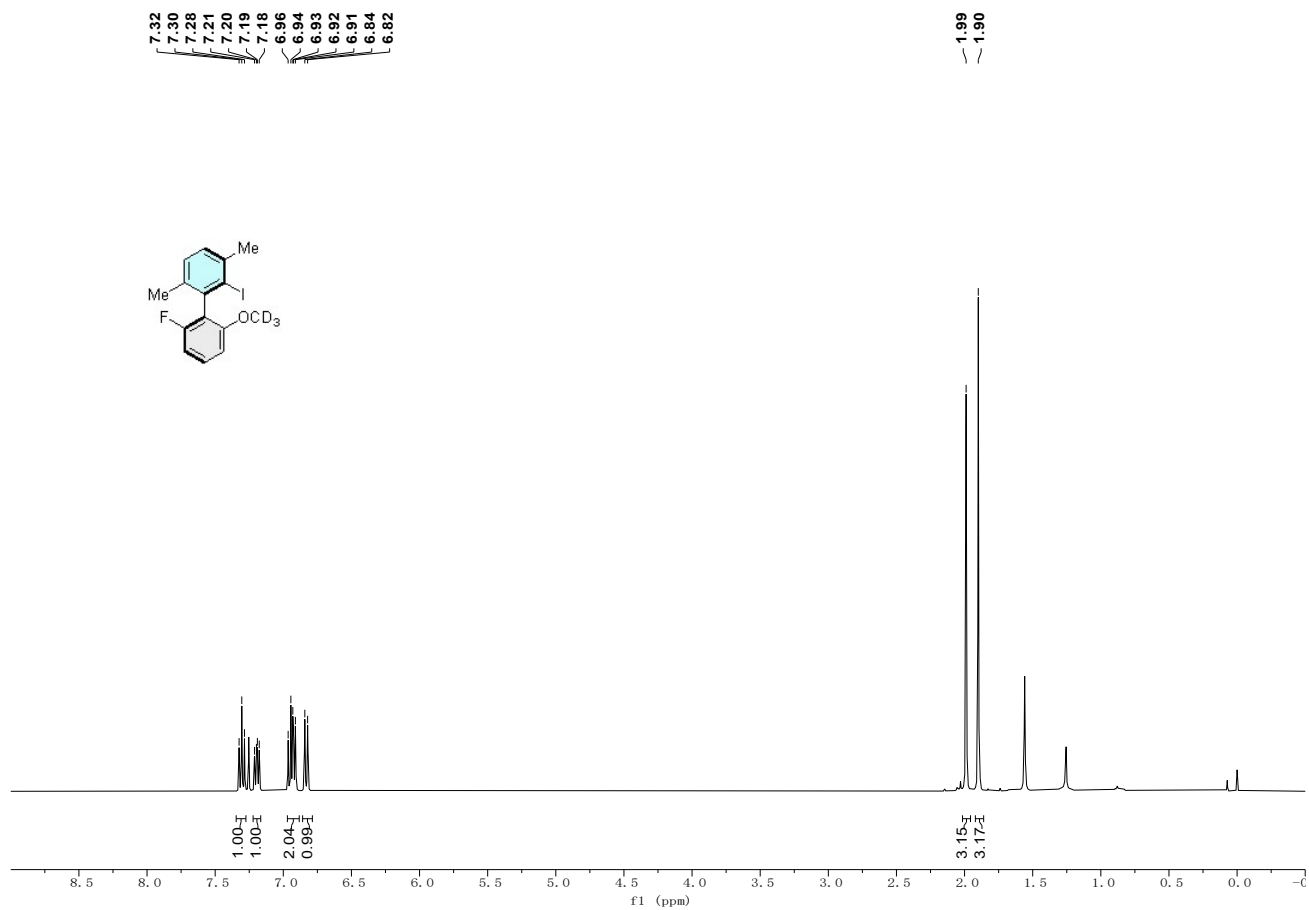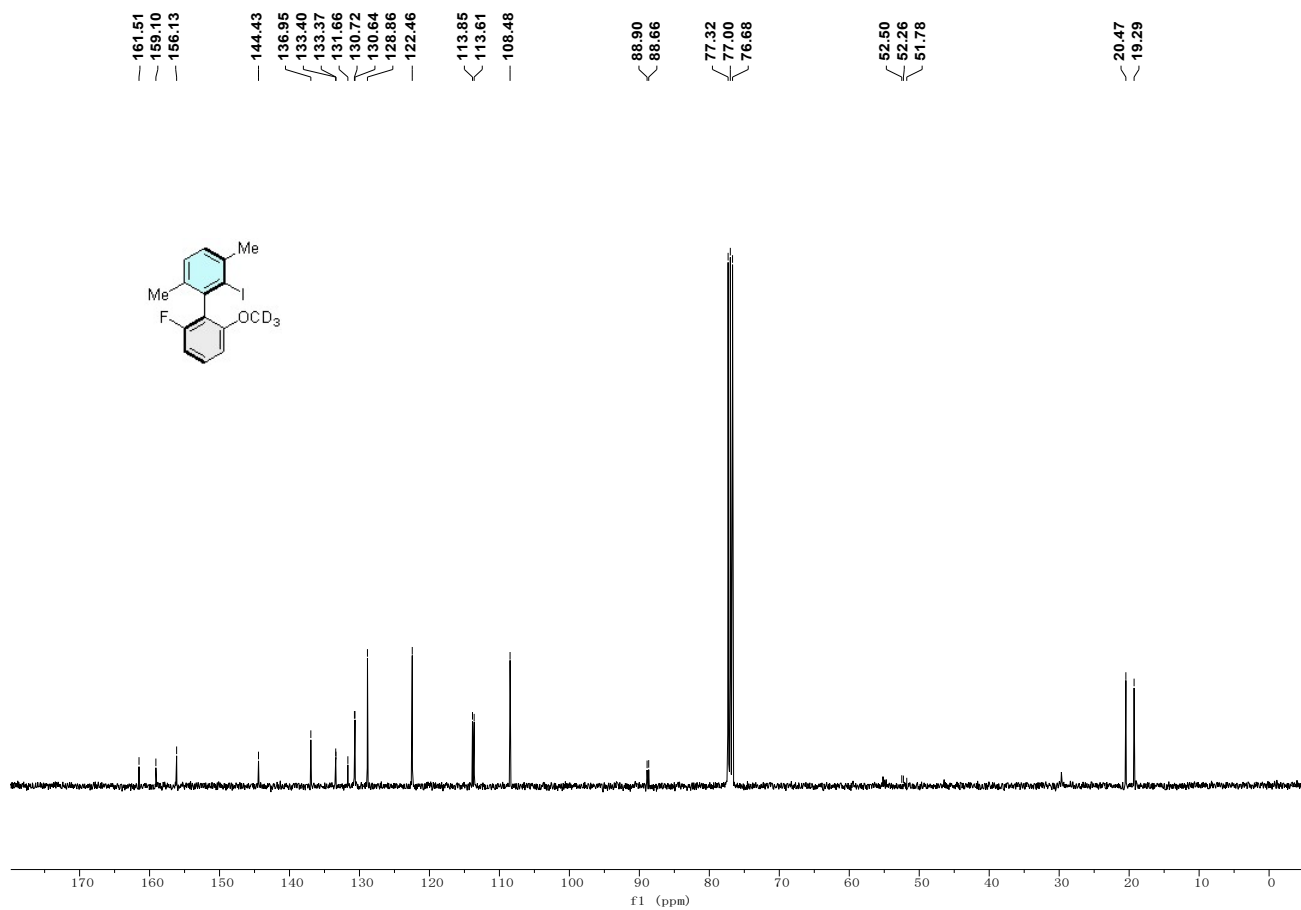

**2k, <sup>1</sup>H NMR (400 MHz, CDCl<sub>3</sub>); <sup>13</sup>C NMR (101 MHz, CDCl<sub>3</sub>)**

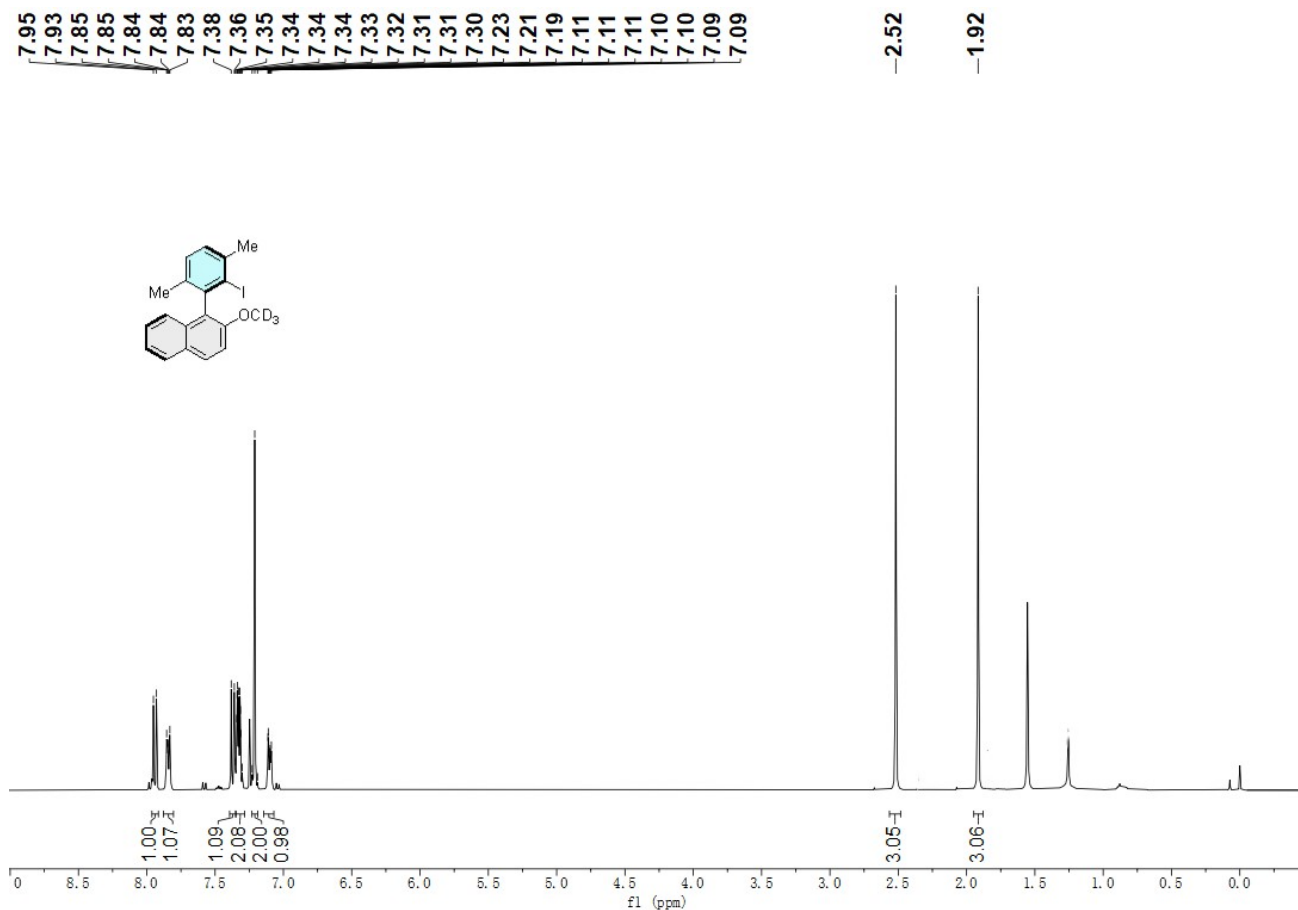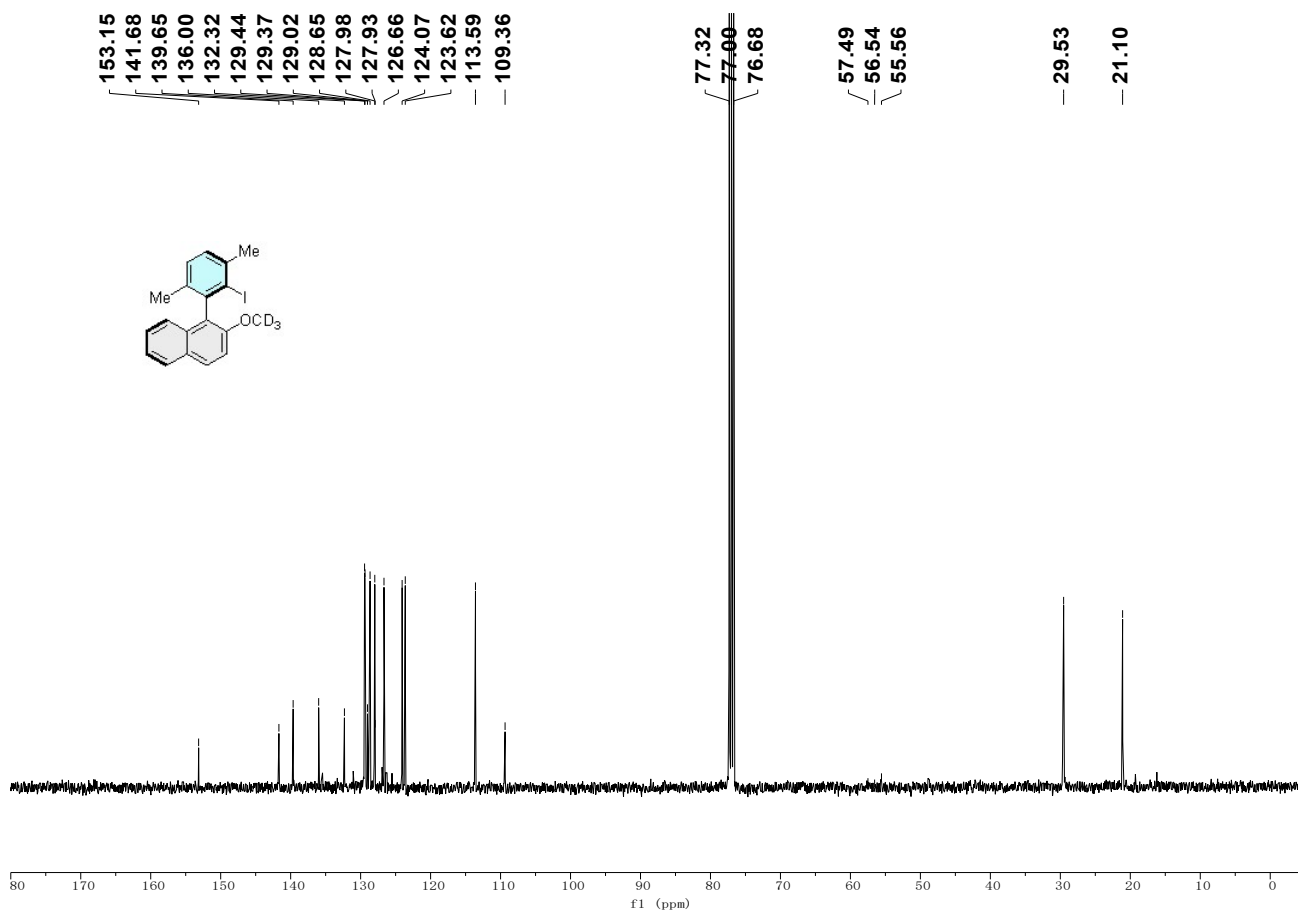

21, <sup>1</sup>H NMR (400 MHz, CDCl<sub>3</sub>); <sup>13</sup>C NMR (101 MHz, CDCl<sub>3</sub>)

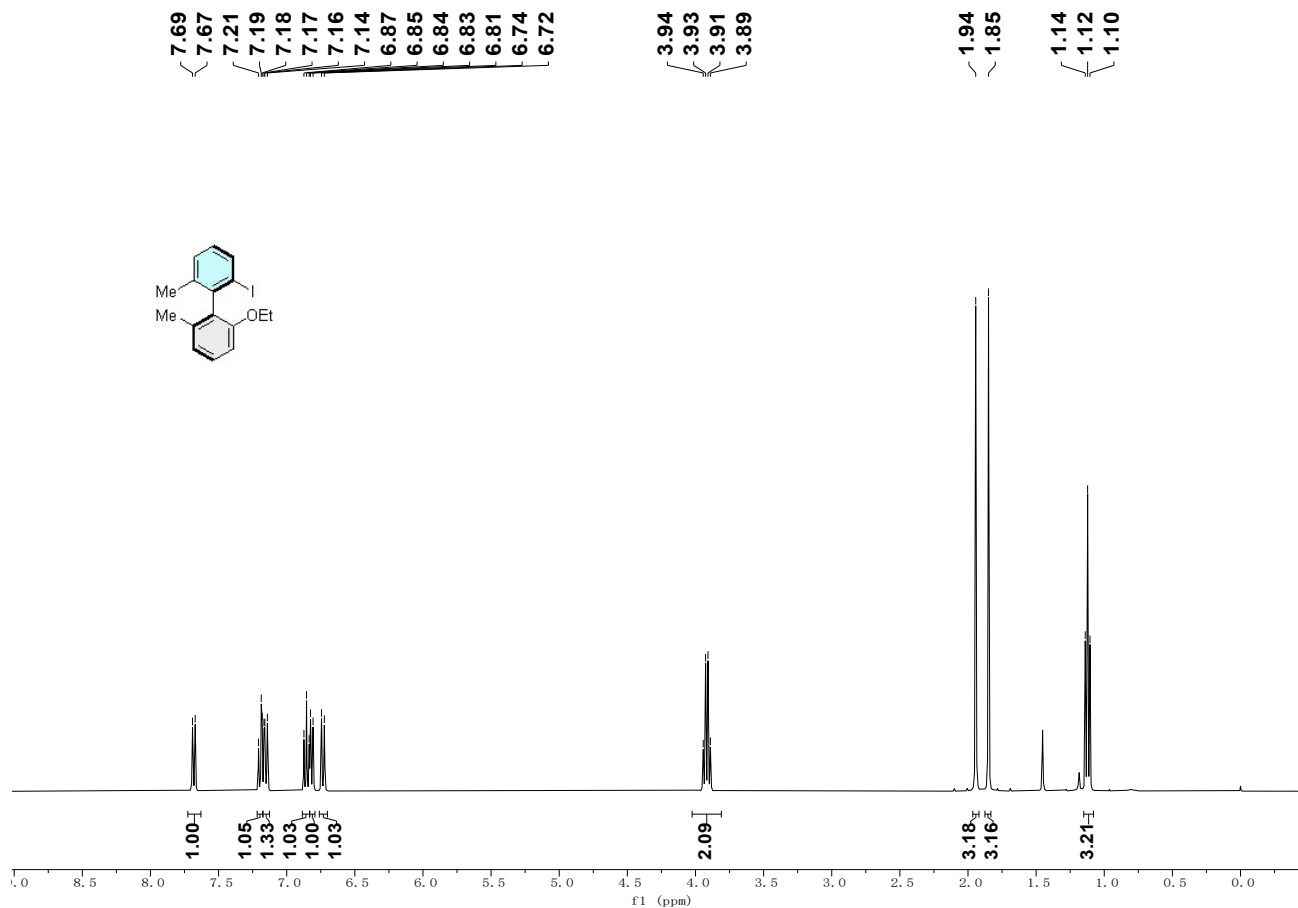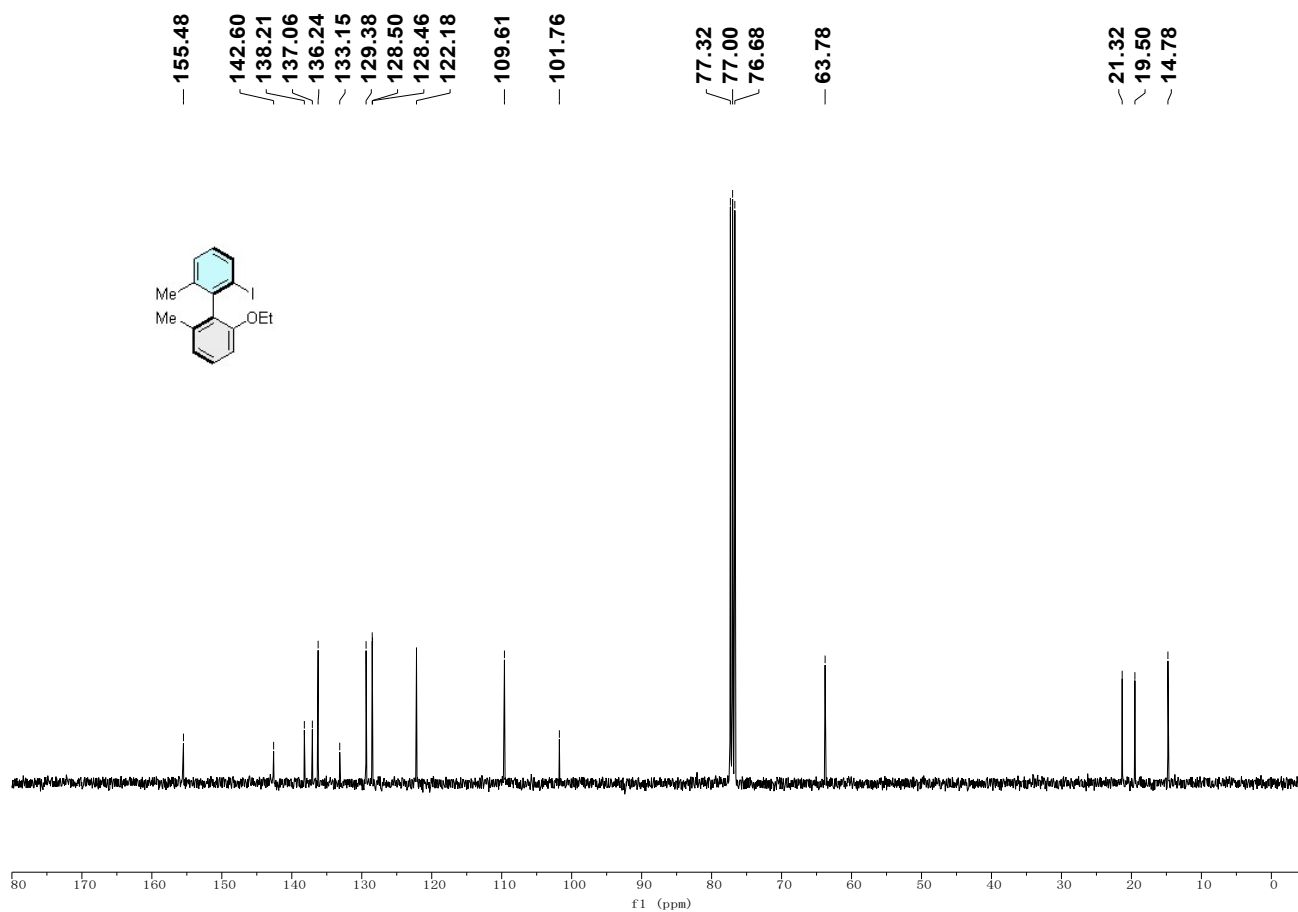

2m, <sup>1</sup>H NMR (400 MHz, CDCl<sub>3</sub>); <sup>13</sup>C NMR (101 MHz, CDCl<sub>3</sub>)

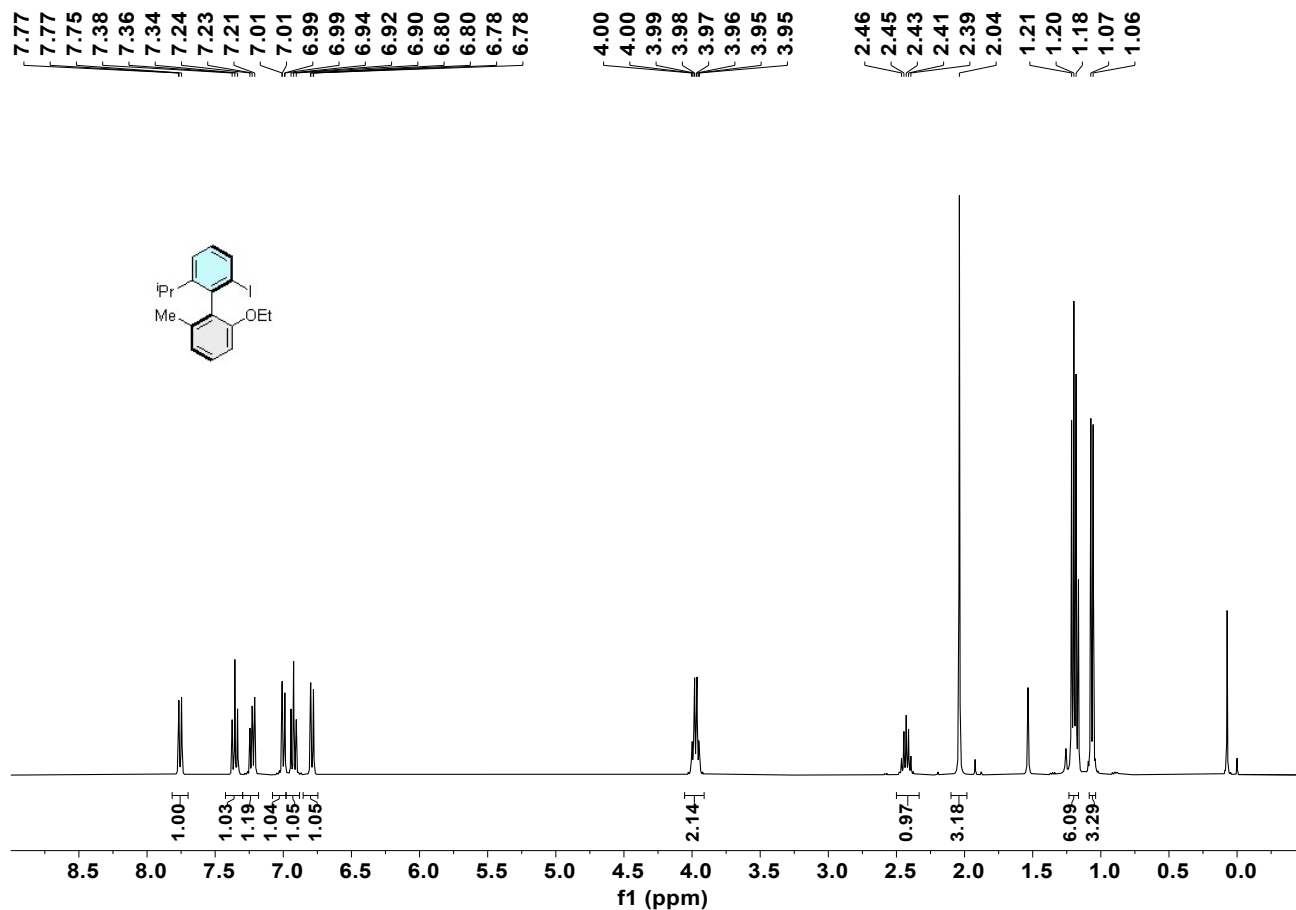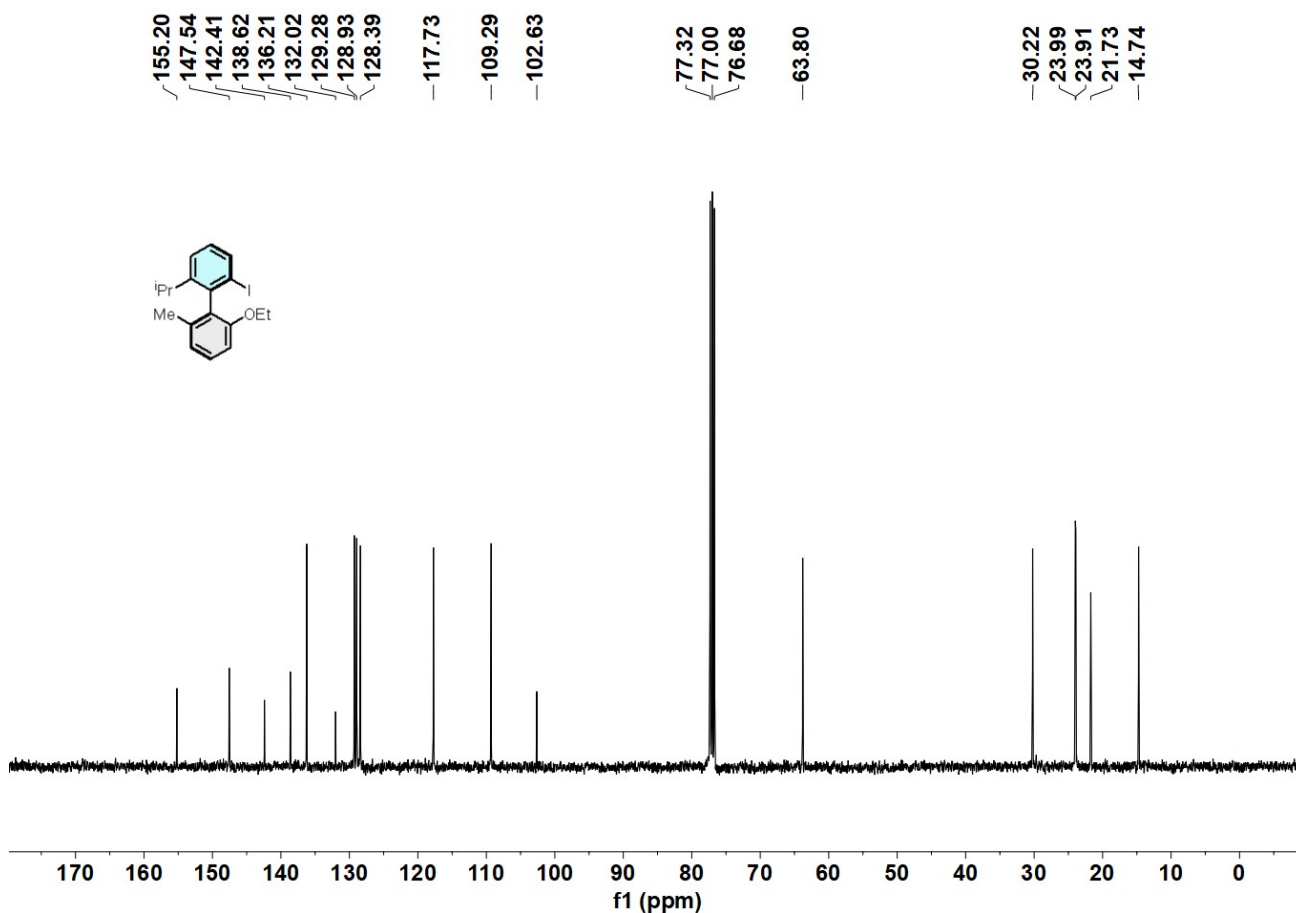

**2n, <sup>1</sup>H NMR (400 MHz, CDCl<sub>3</sub>); <sup>13</sup>C NMR (101 MHz, CDCl<sub>3</sub>)**

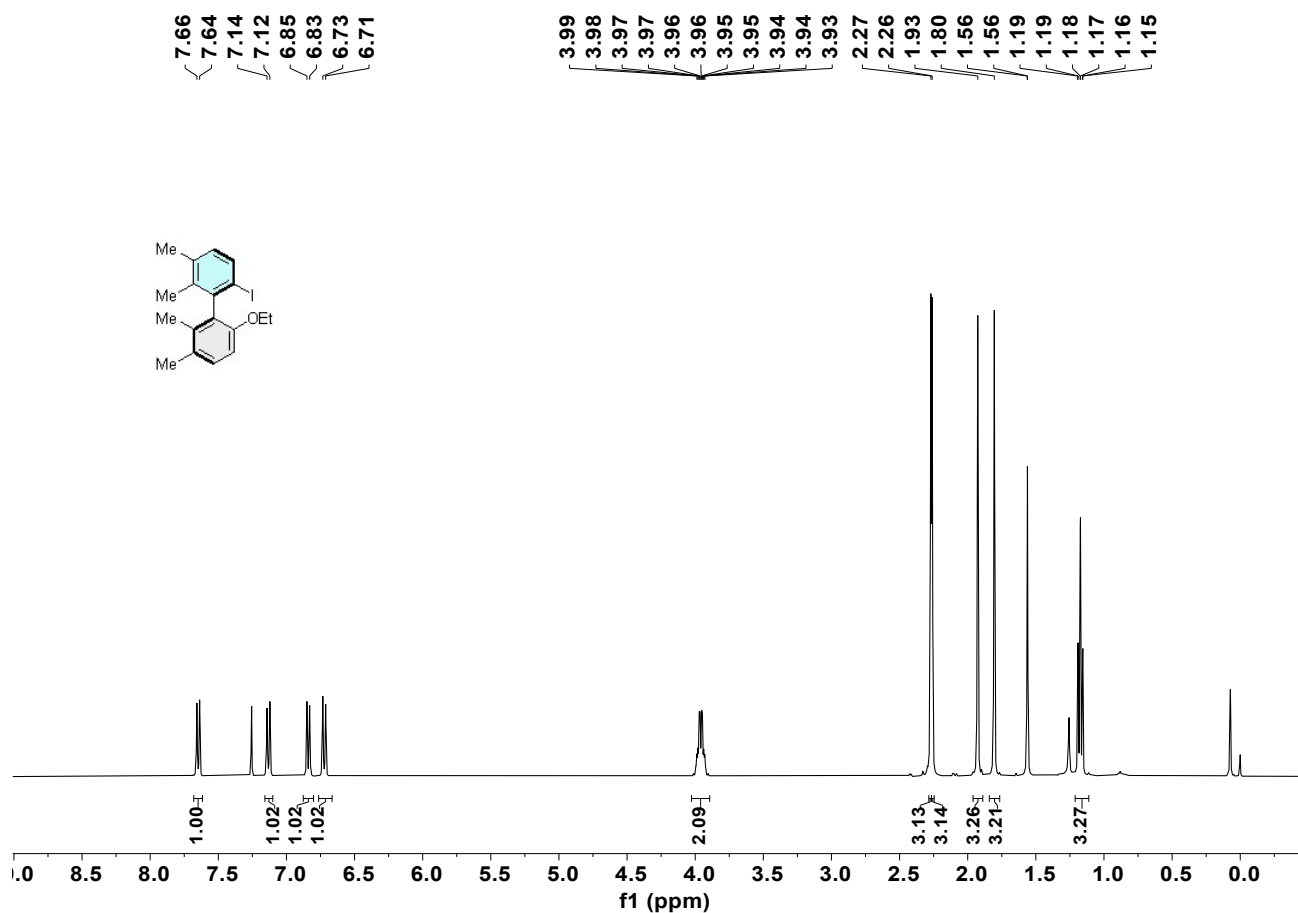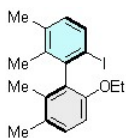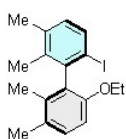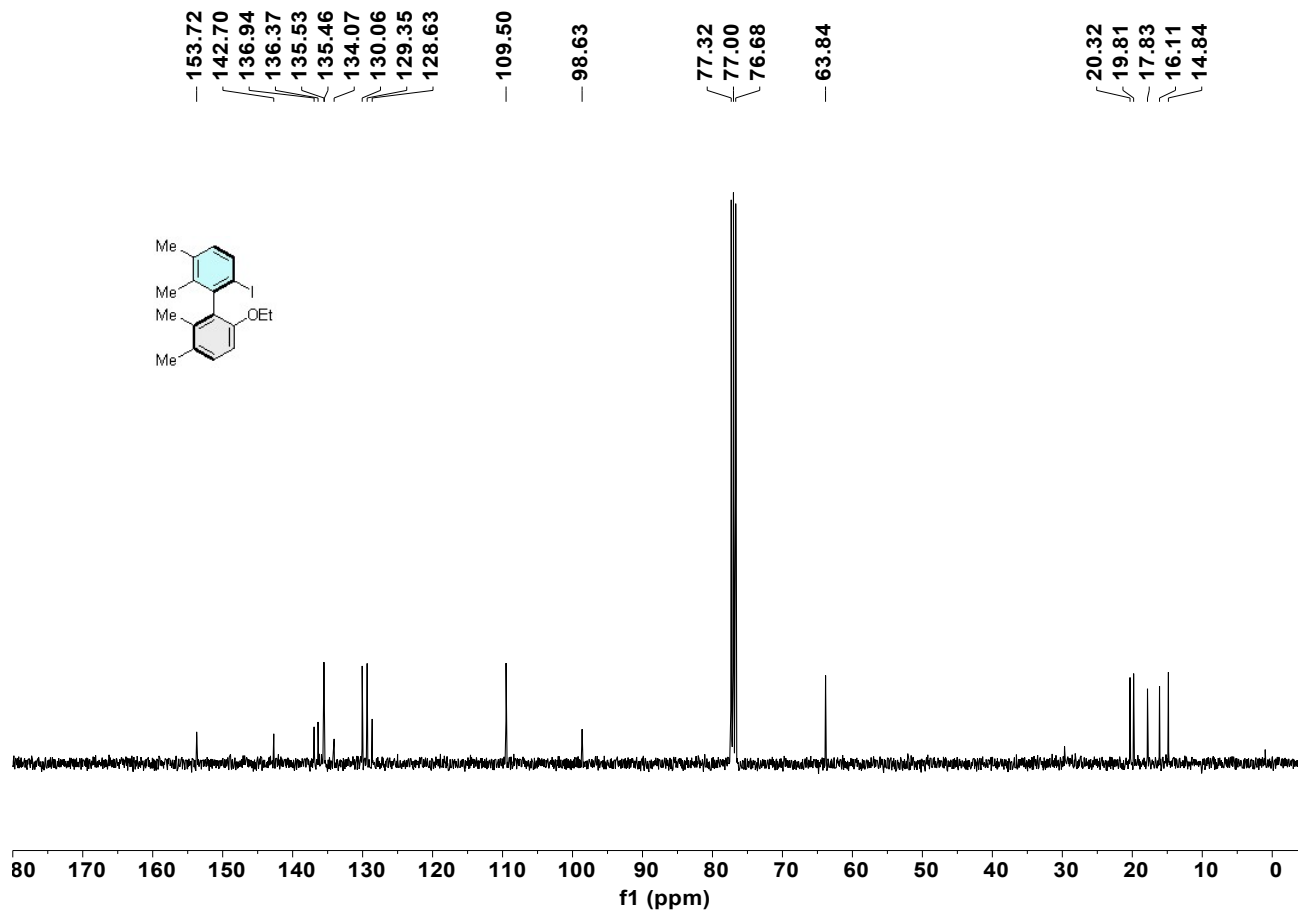

20, <sup>1</sup>H NMR (400 MHz, CDCl<sub>3</sub>); <sup>13</sup>C NMR (101 MHz, CDCl<sub>3</sub>)

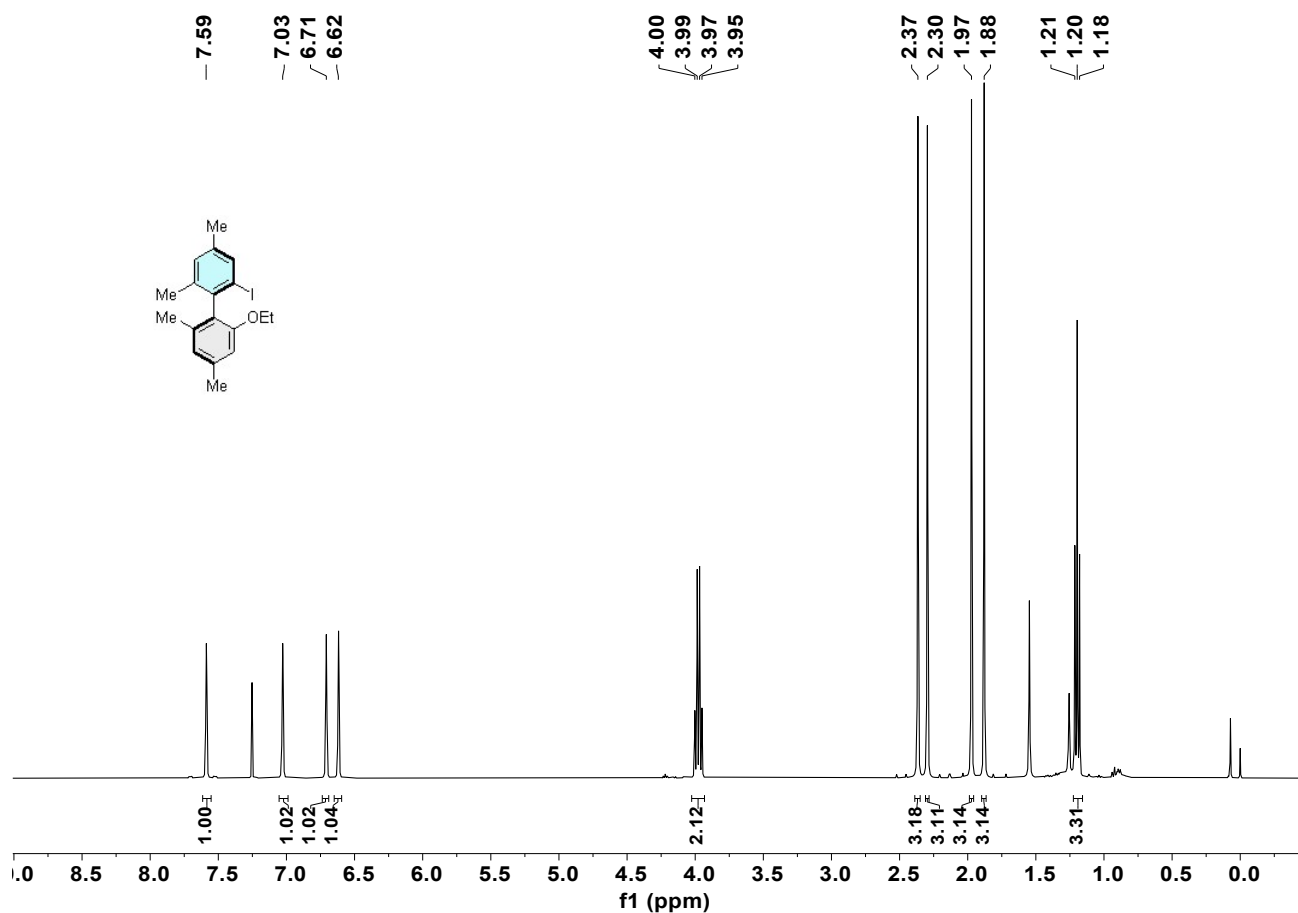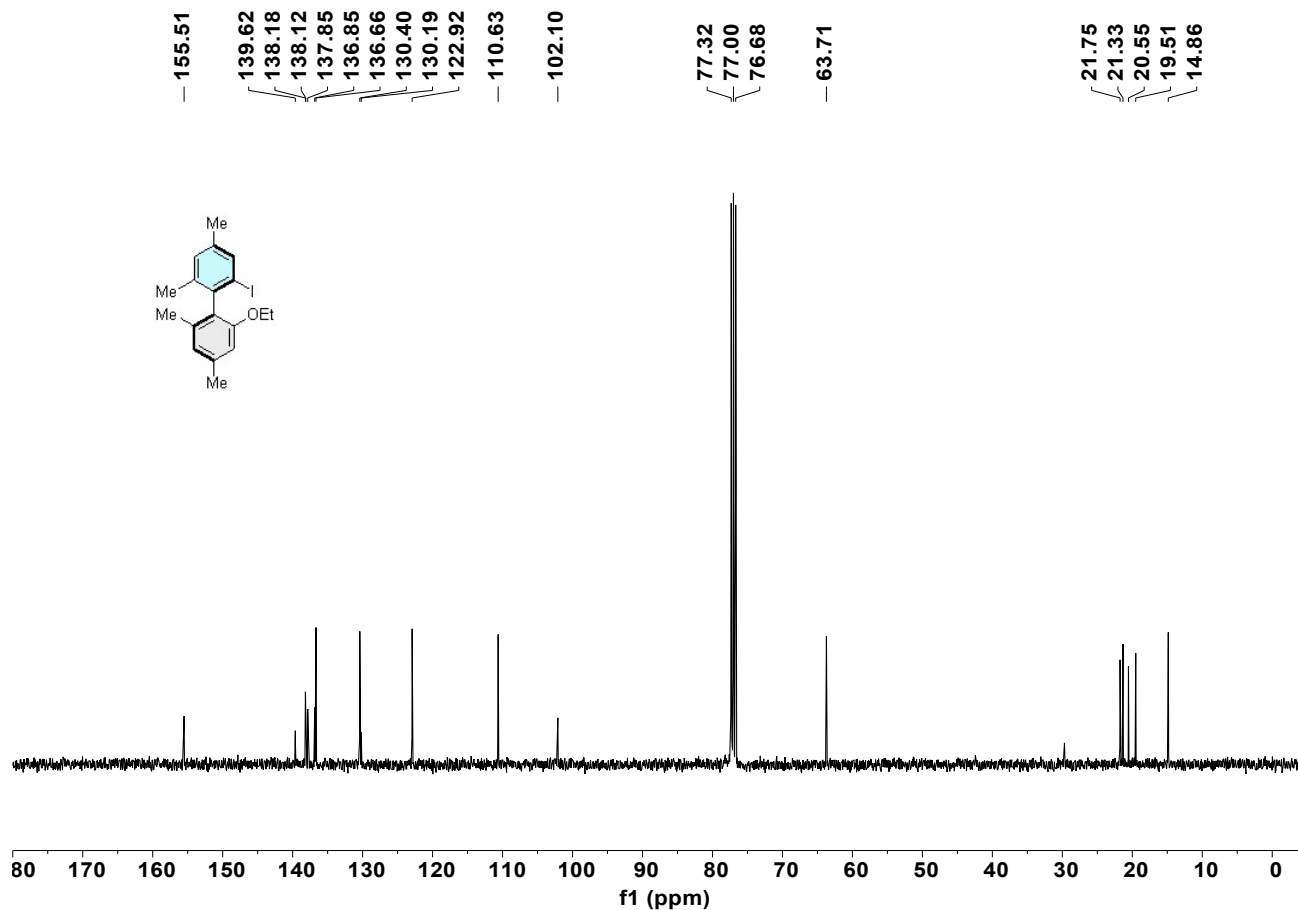

2p, <sup>1</sup>H NMR (400 MHz, CDCl<sub>3</sub>); <sup>13</sup>C NMR (101 MHz, CDCl<sub>3</sub>)

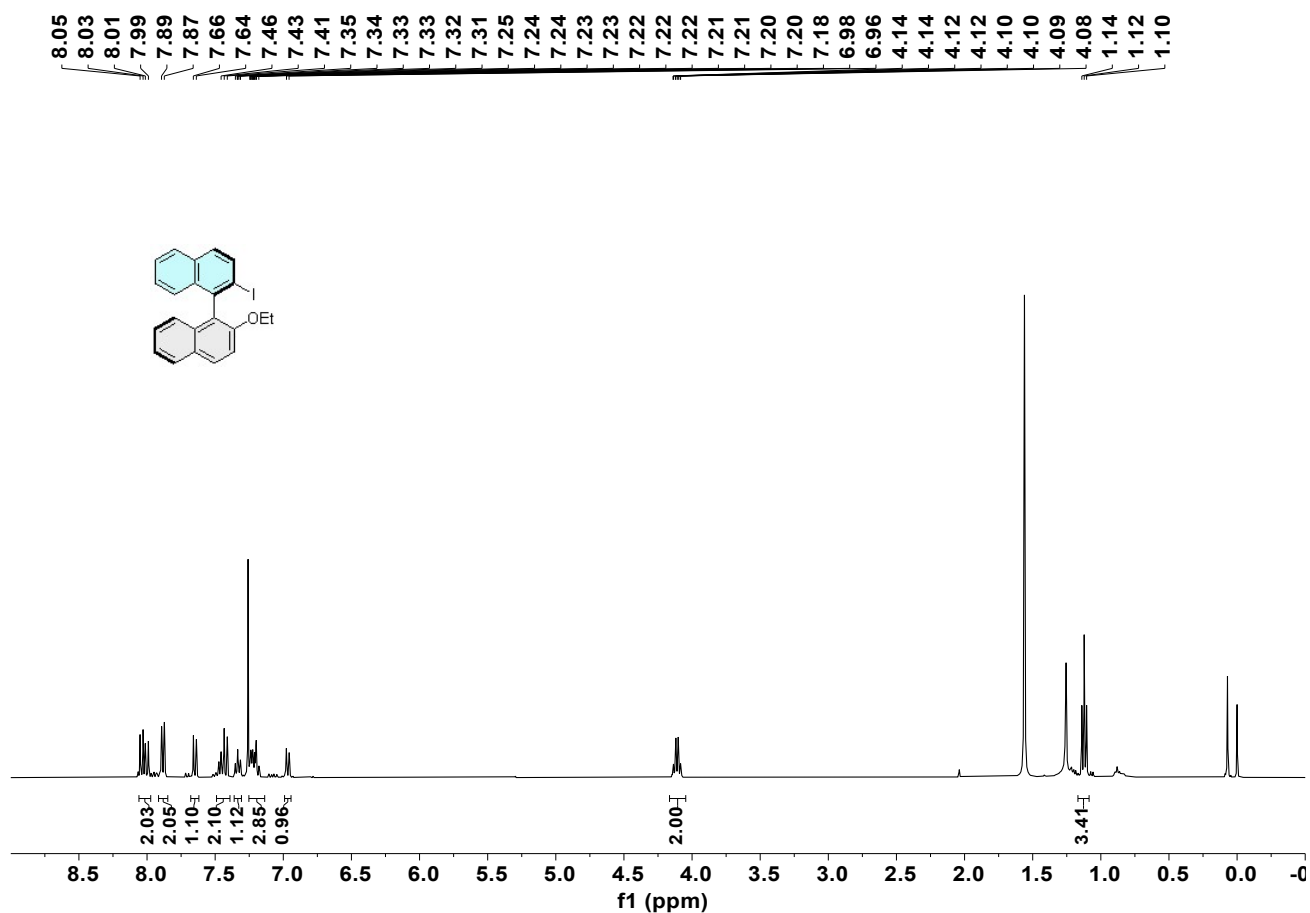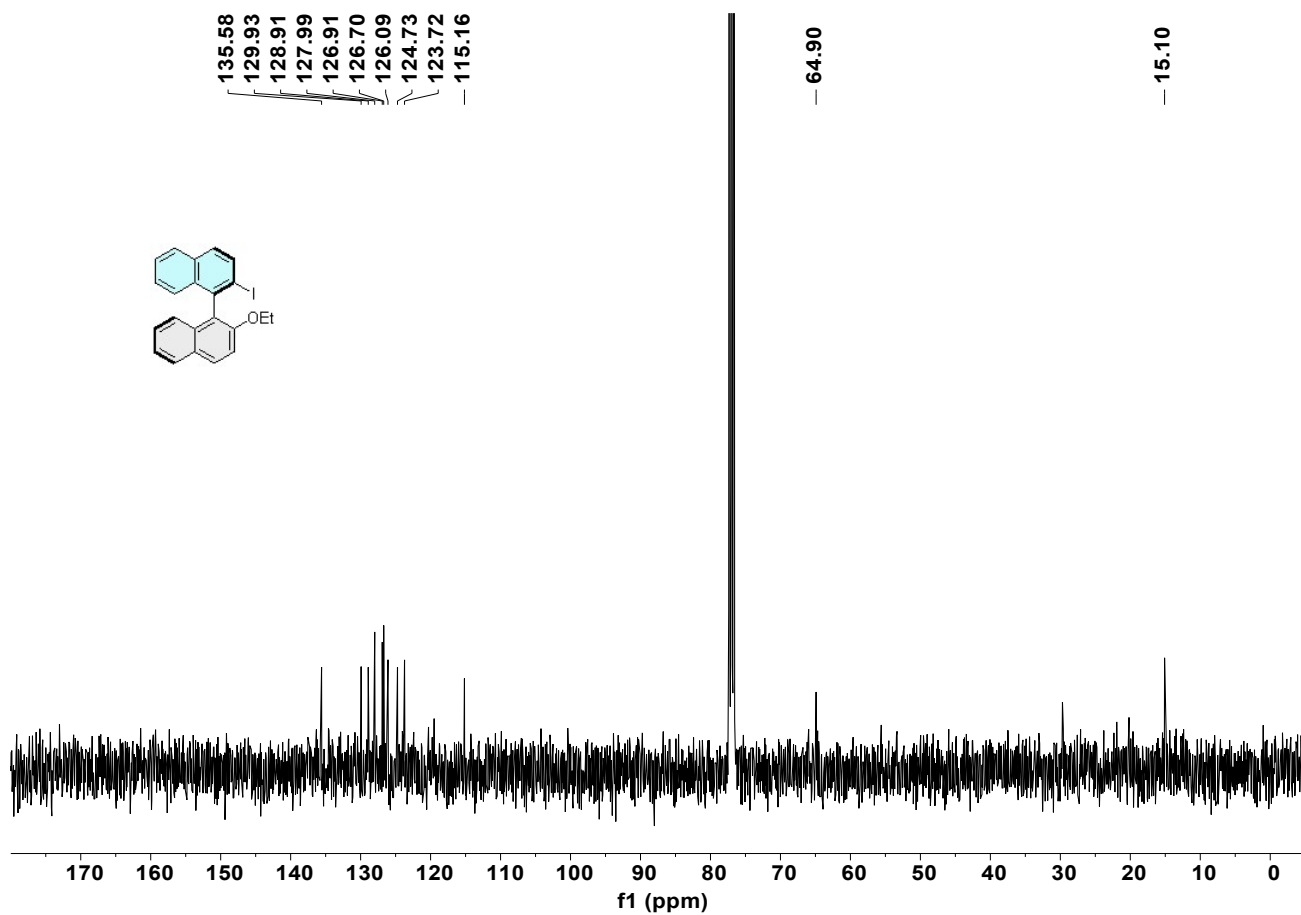

**2q,  $^1\text{H}$  NMR (400 MHz,  $\text{CDCl}_3$ );  $^{13}\text{C}$  NMR (101 MHz,  $\text{CDCl}_3$ )**

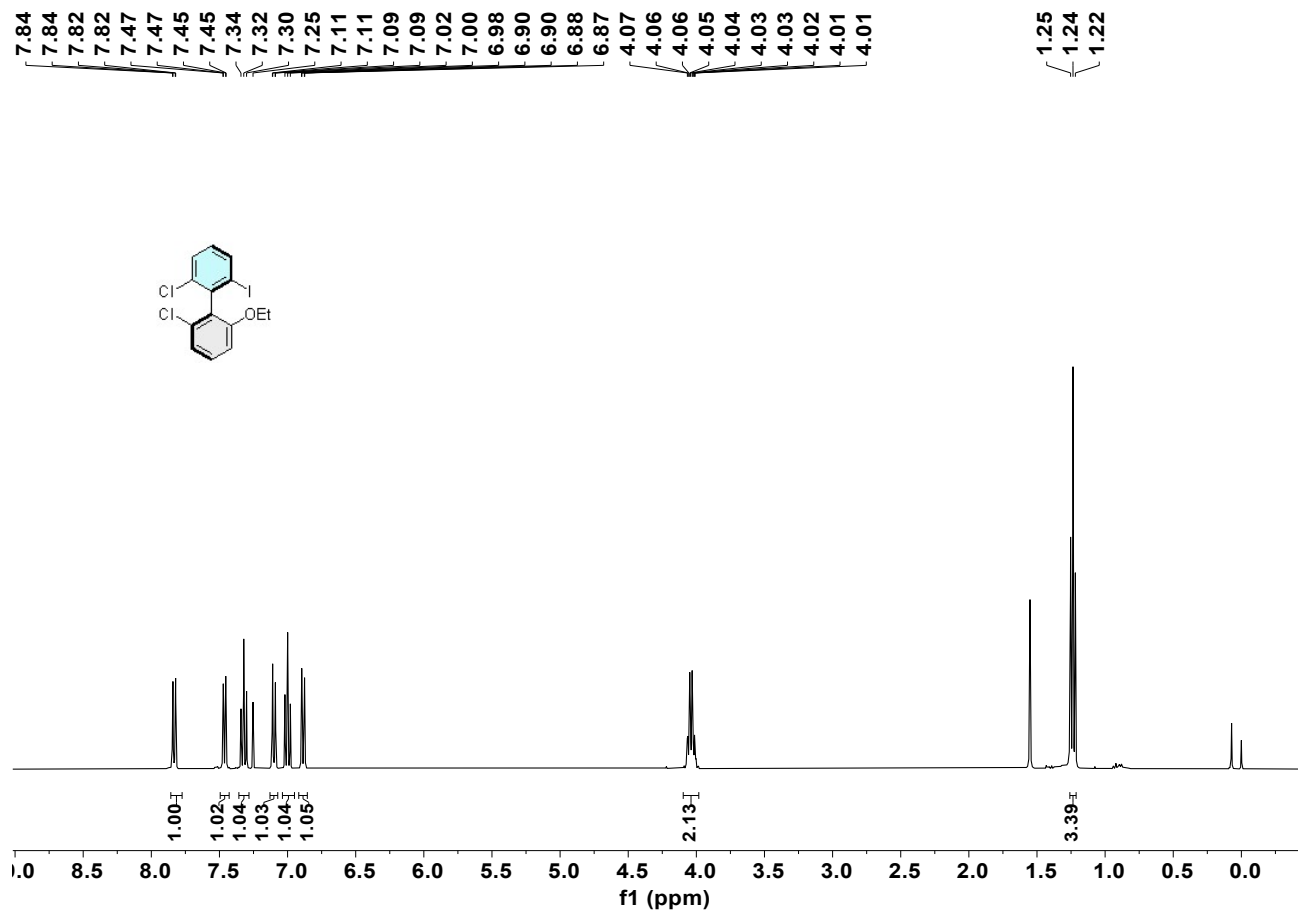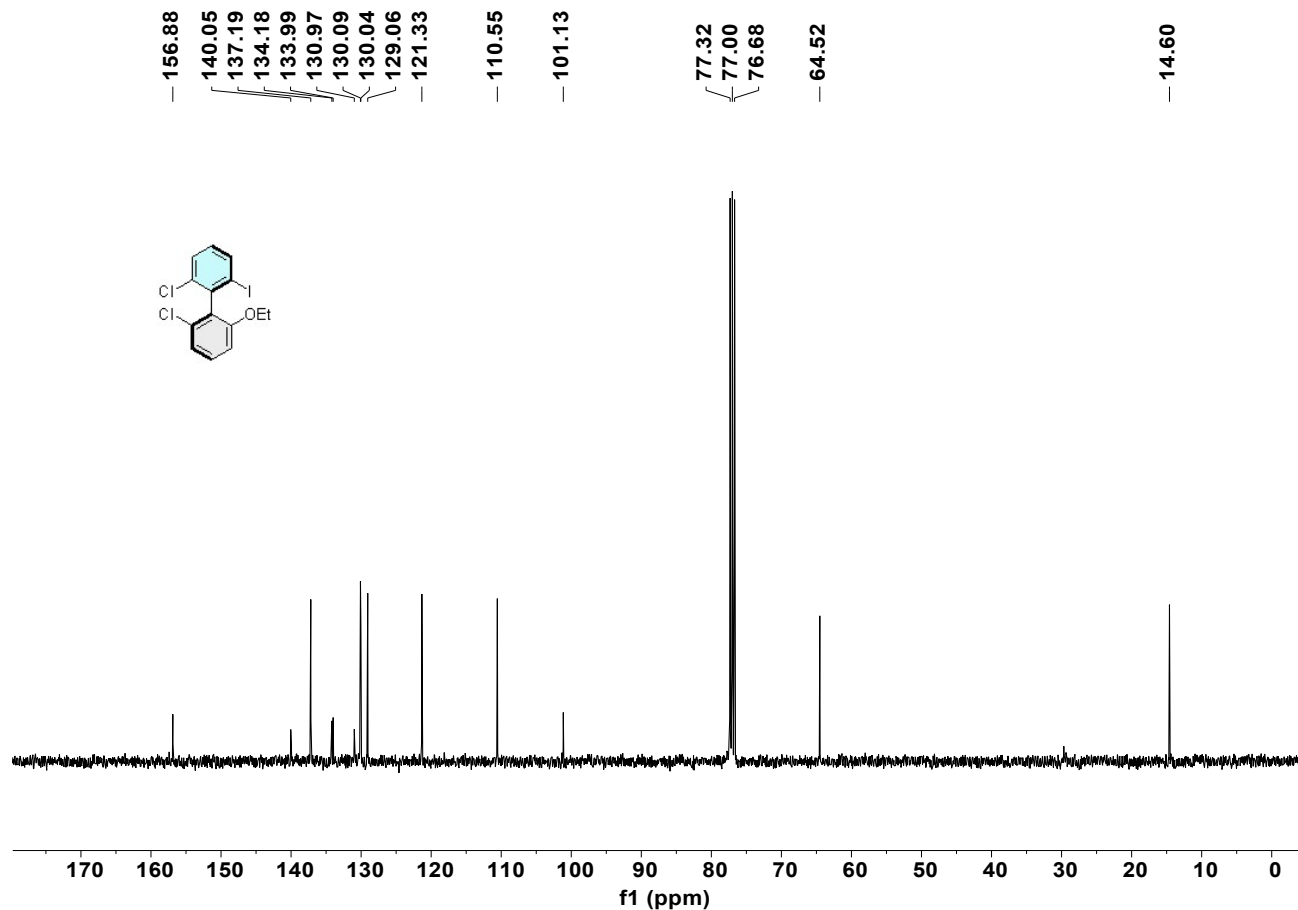

2r, <sup>1</sup>H NMR (400 MHz, CDCl<sub>3</sub>); <sup>13</sup>C NMR (101 MHz, CDCl<sub>3</sub>)

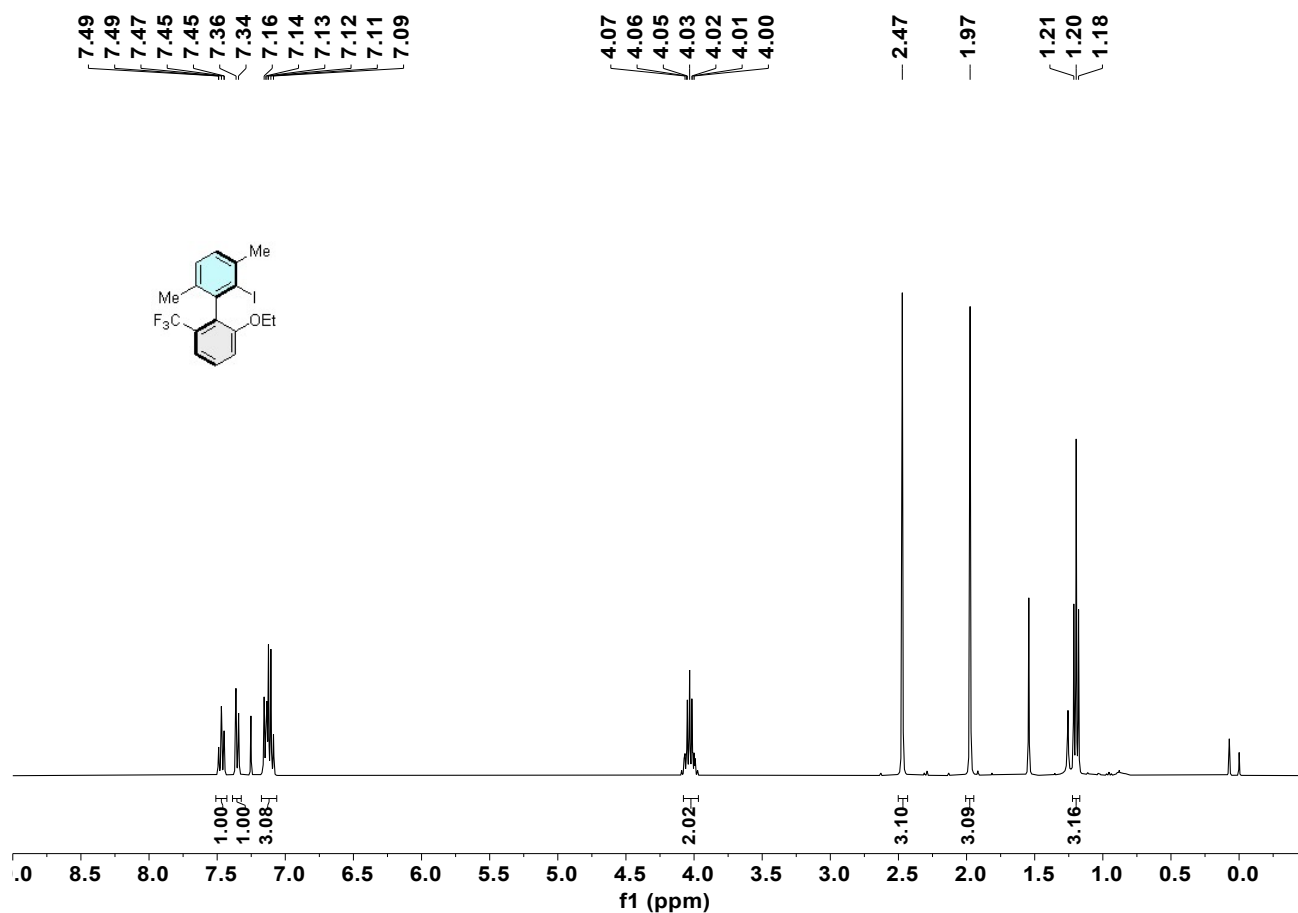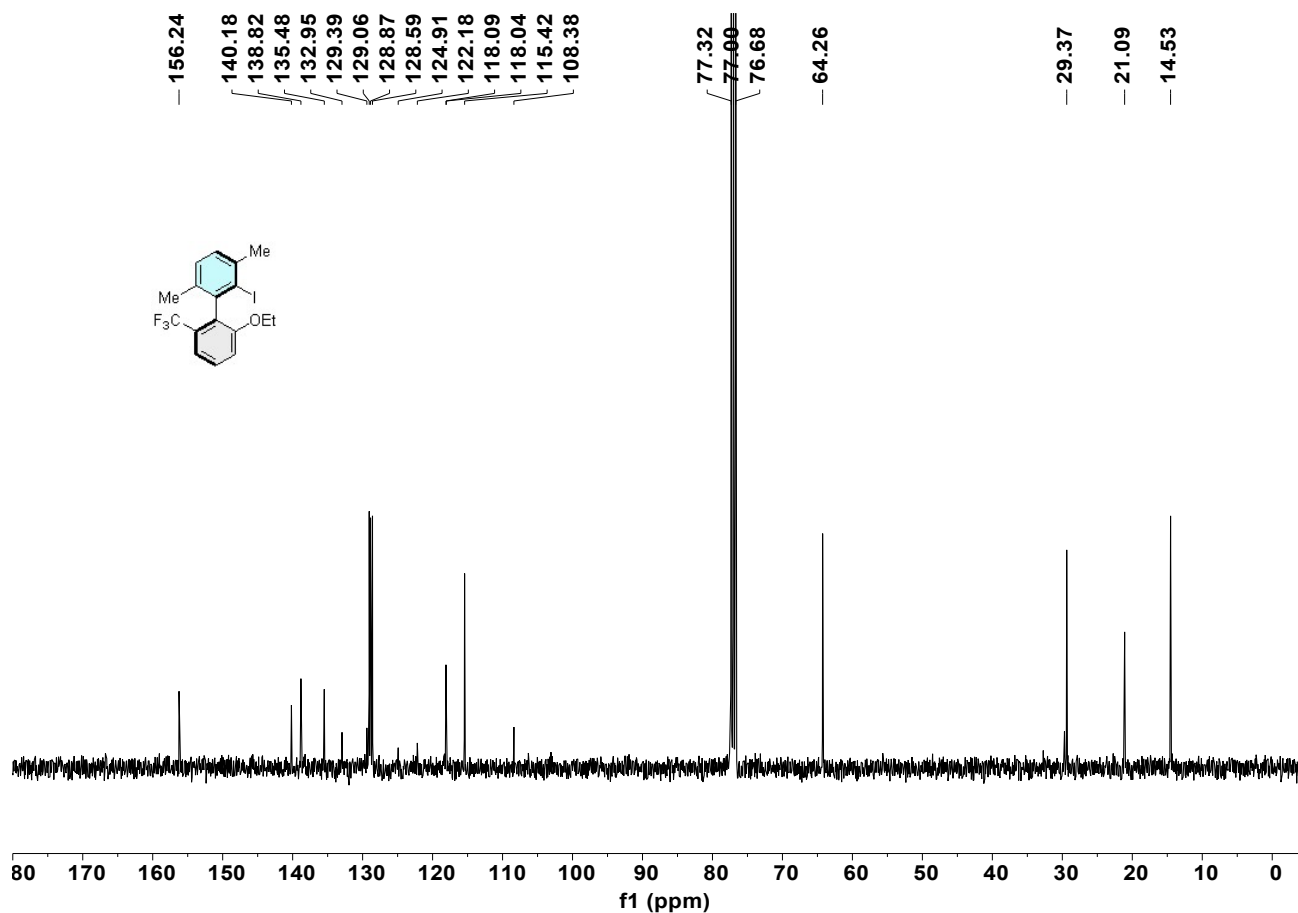

2s,  $^1\text{H}$  NMR (400 MHz,  $\text{CDCl}_3$ );  $^{13}\text{C}$  NMR (101 MHz,  $\text{CDCl}_3$ )

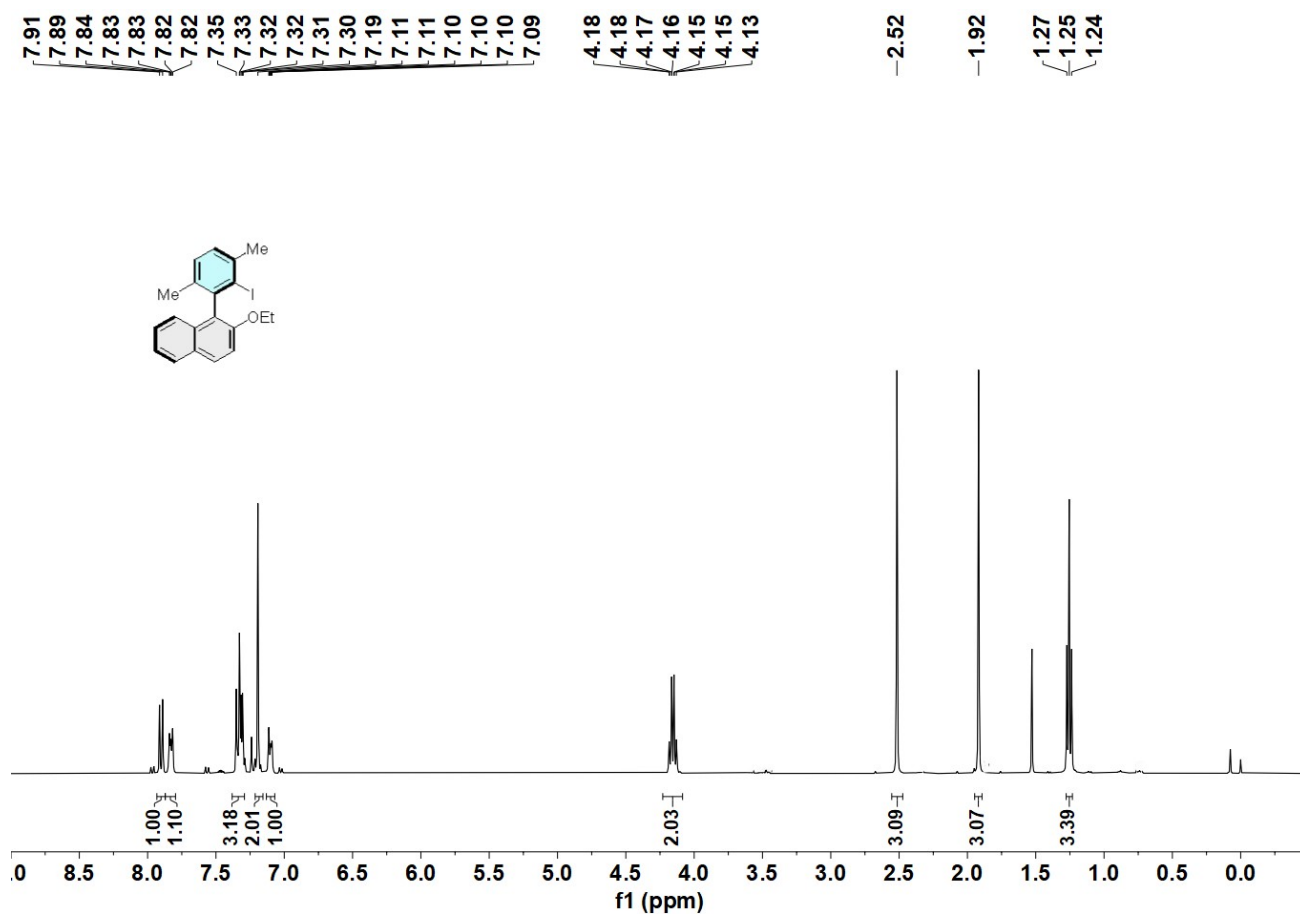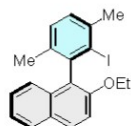

$^{13}\text{C}$  NMR (101 MHz,  $\text{CDCl}_3$ ) spectrum showing chemical shifts (ppm):

- 152.51, 141.82, 139.45, 136.02, 132.47, 129.23, 129.01, 128.48, 128.42, 127.98, 127.94, 126.53, 124.17, 123.56, 114.92, 109.37
- 77.32, 77.00, 76.68
- 64.56
- 29.54, -21.09, -15.24

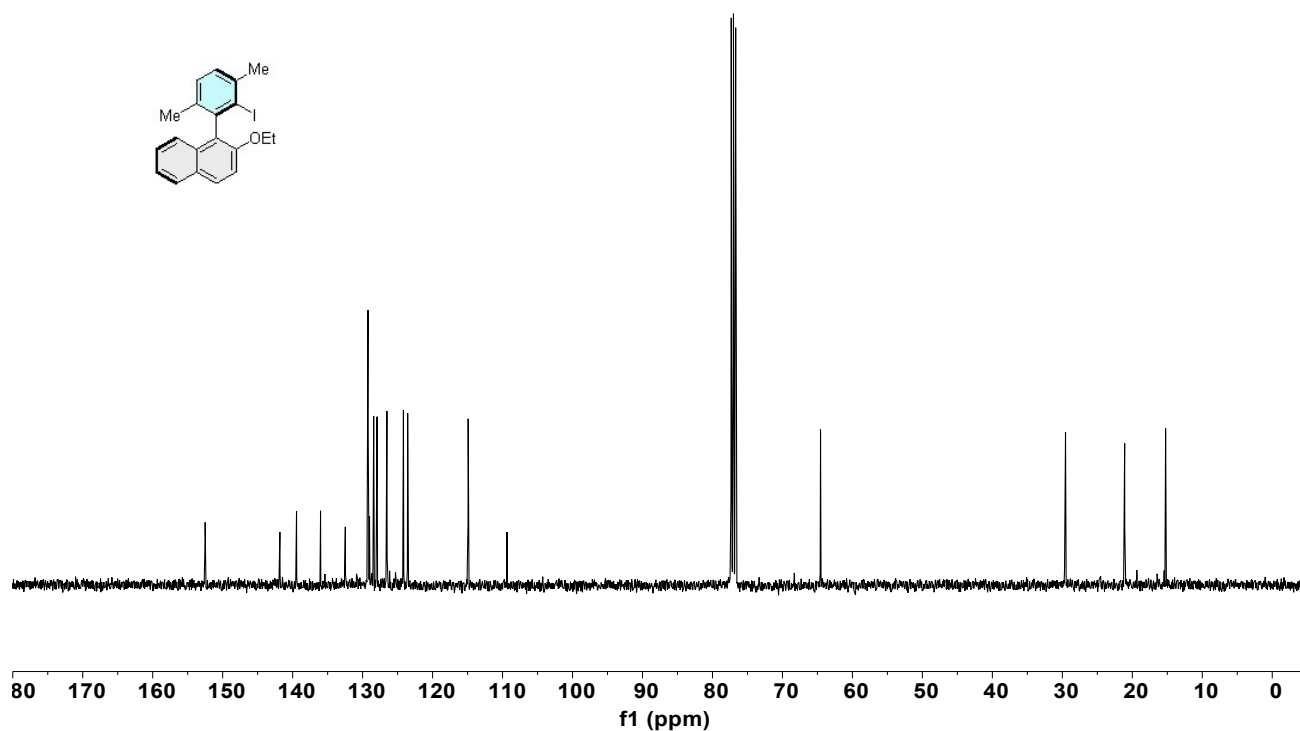

2t, <sup>1</sup>H NMR (400 MHz, CDCl<sub>3</sub>); <sup>13</sup>C NMR (101 MHz, CDCl<sub>3</sub>)

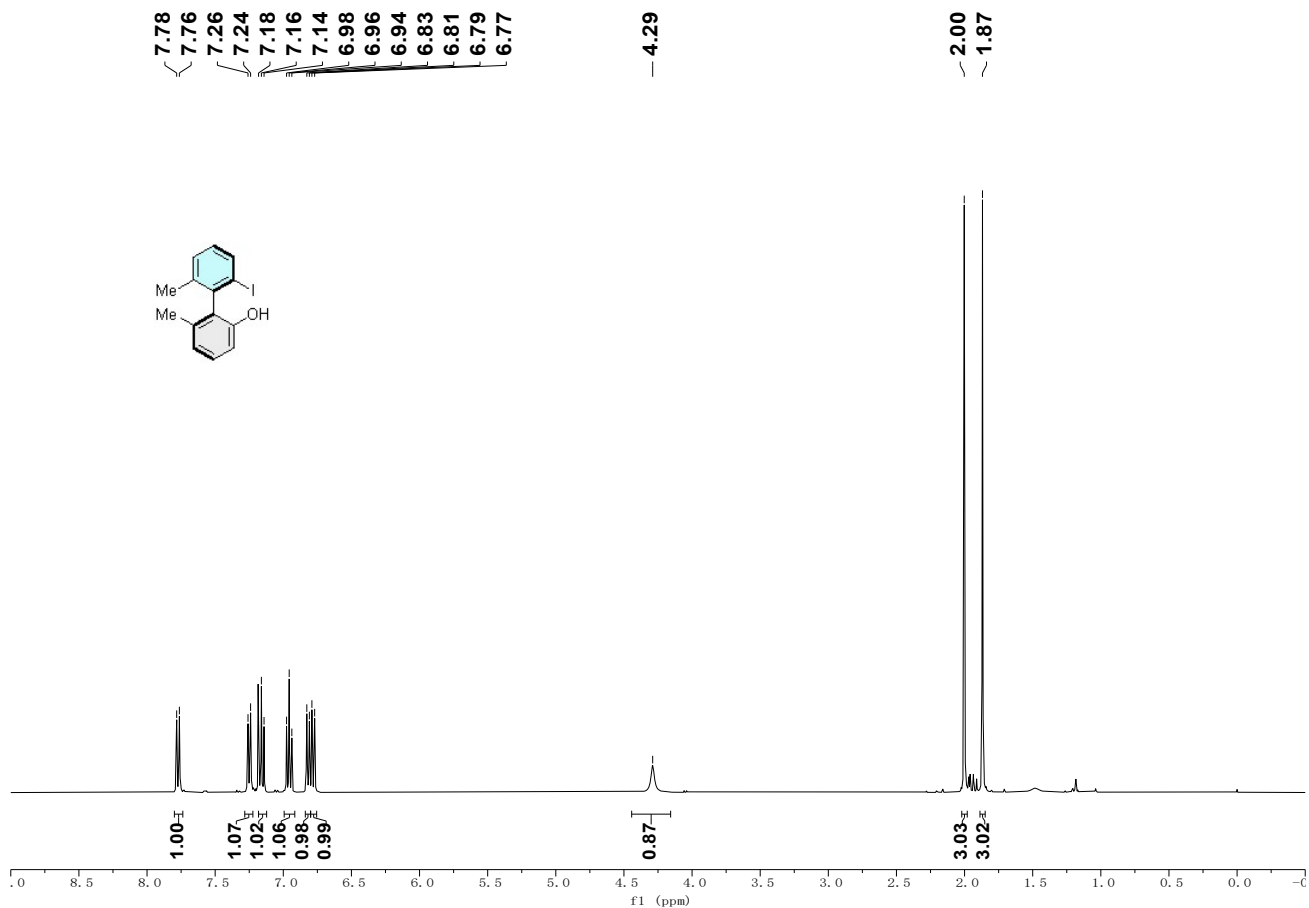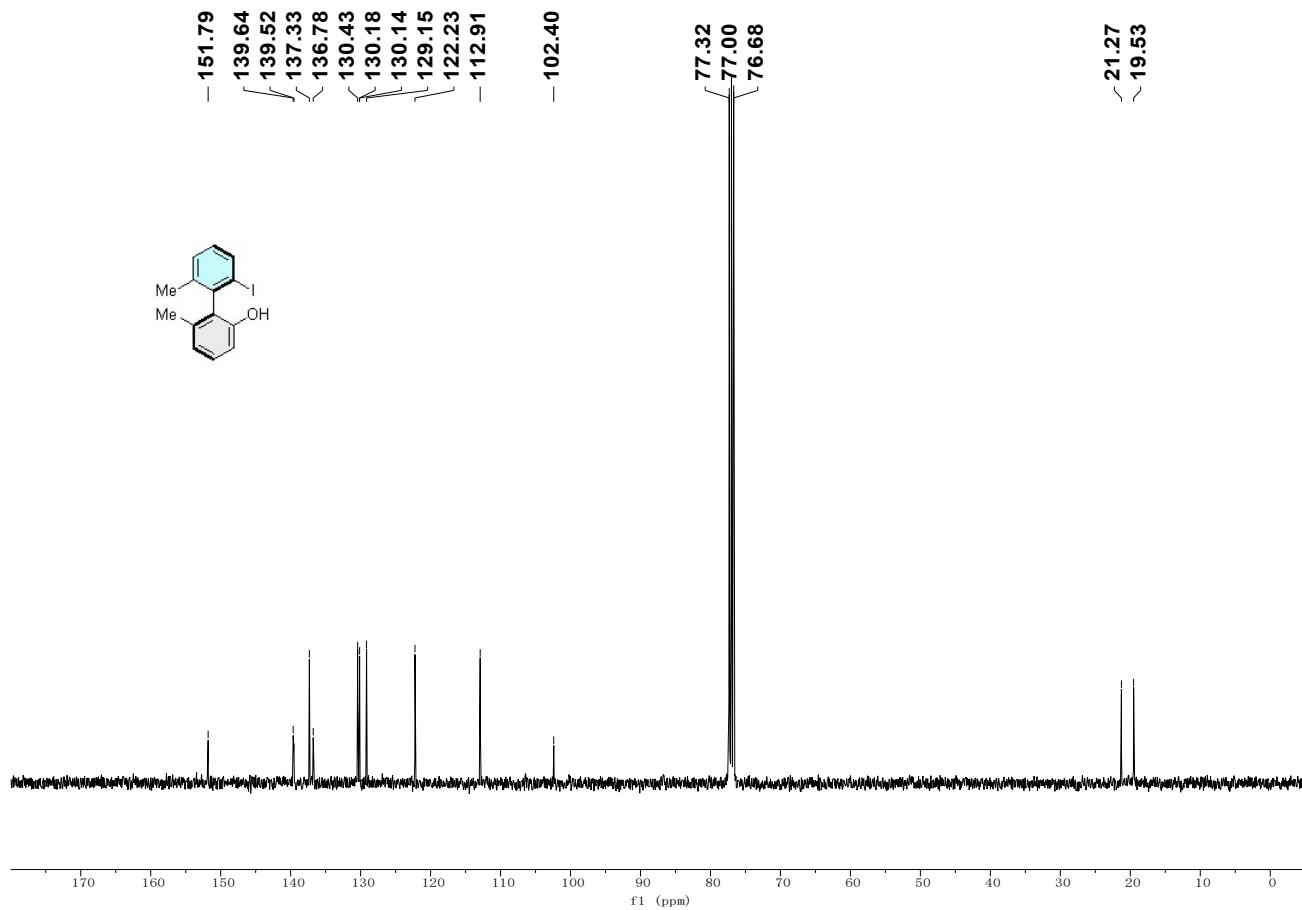

2u,  $^1\text{H}$  NMR (400 MHz,  $\text{CDCl}_3$ );  $^{13}\text{C}$  NMR (101 MHz,  $\text{CDCl}_3$ )

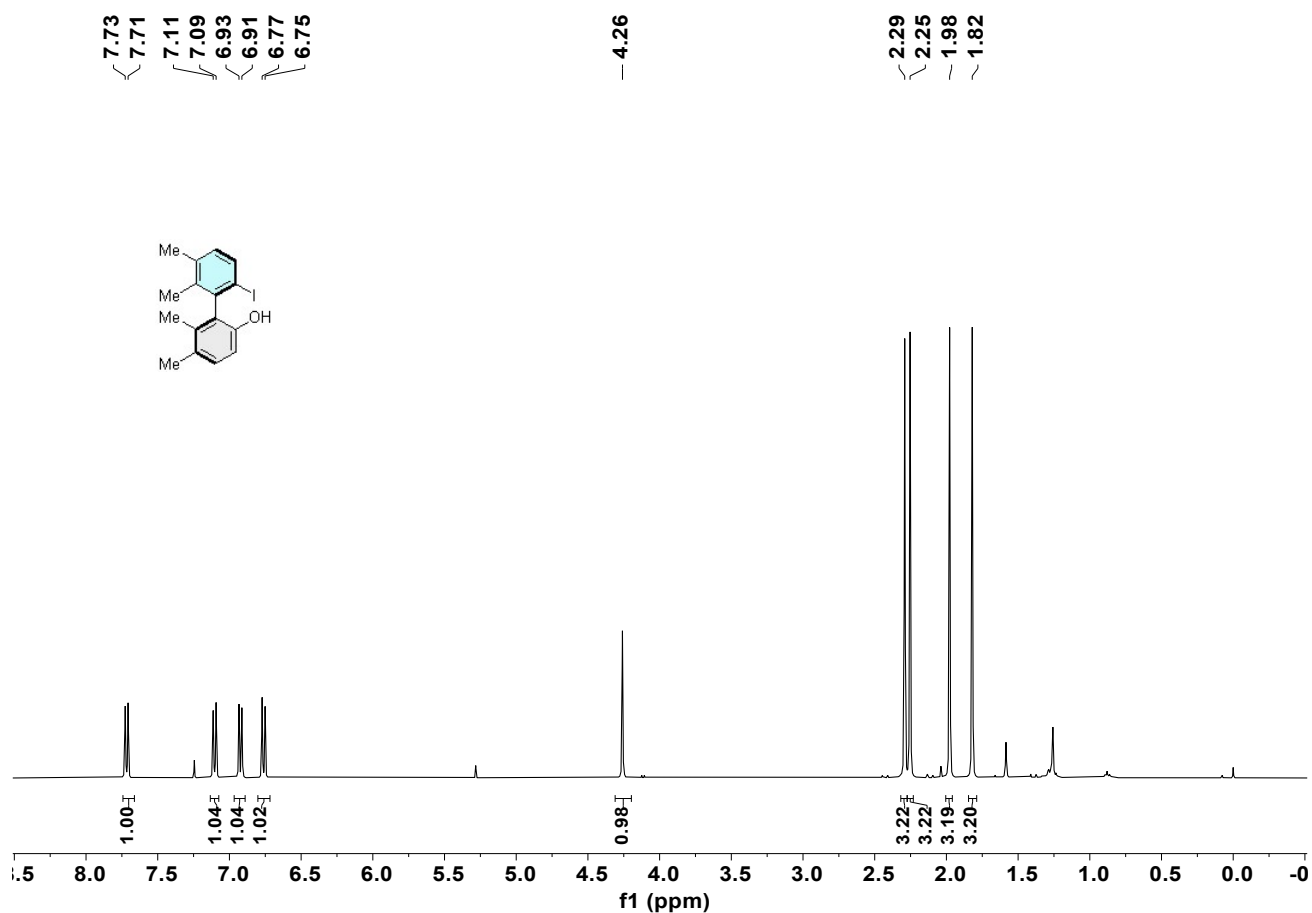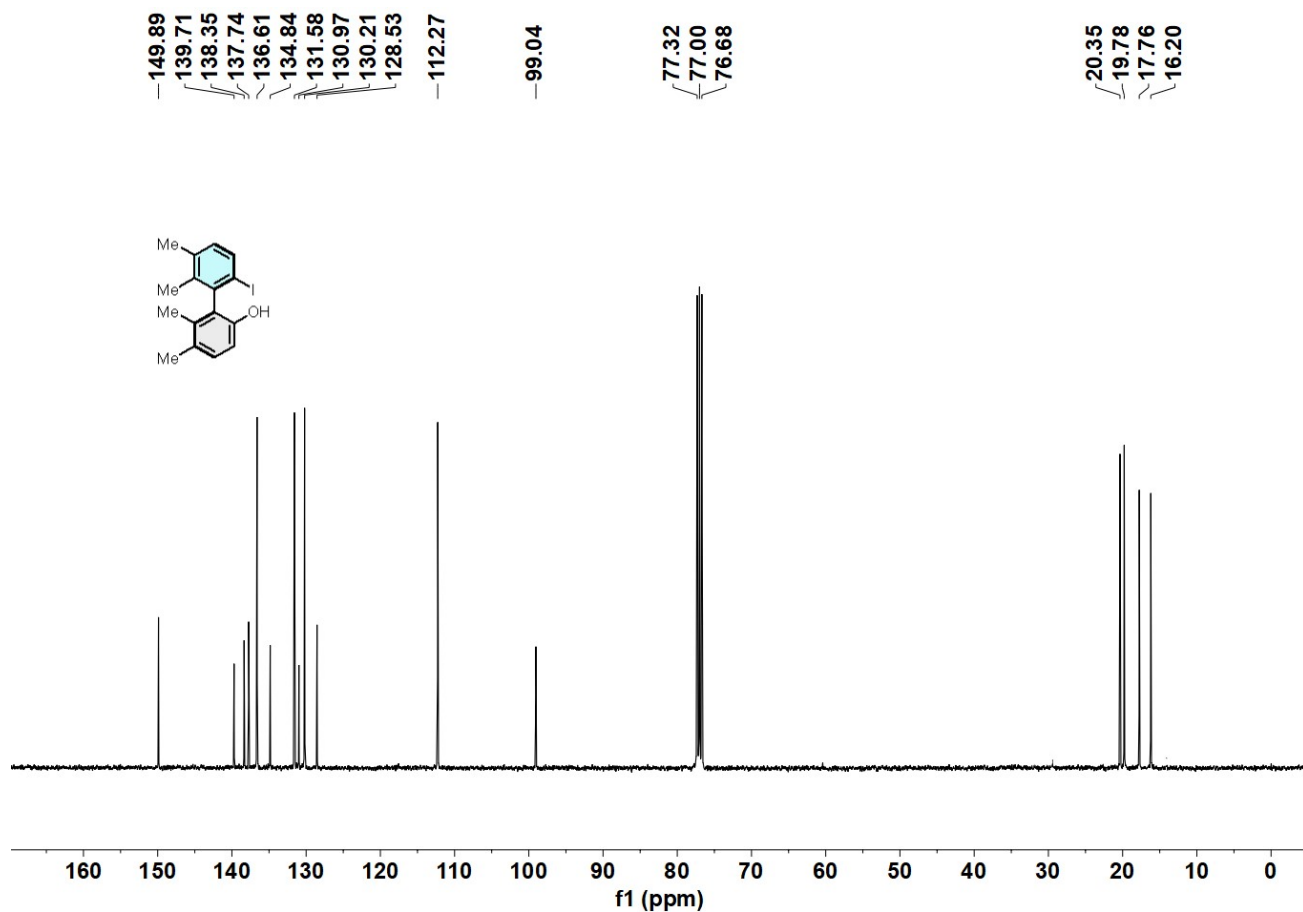

2v,  $^1\text{H}$  NMR (400 MHz,  $\text{CDCl}_3$ );  $^{13}\text{C}$  NMR (101 MHz,  $\text{CDCl}_3$ )

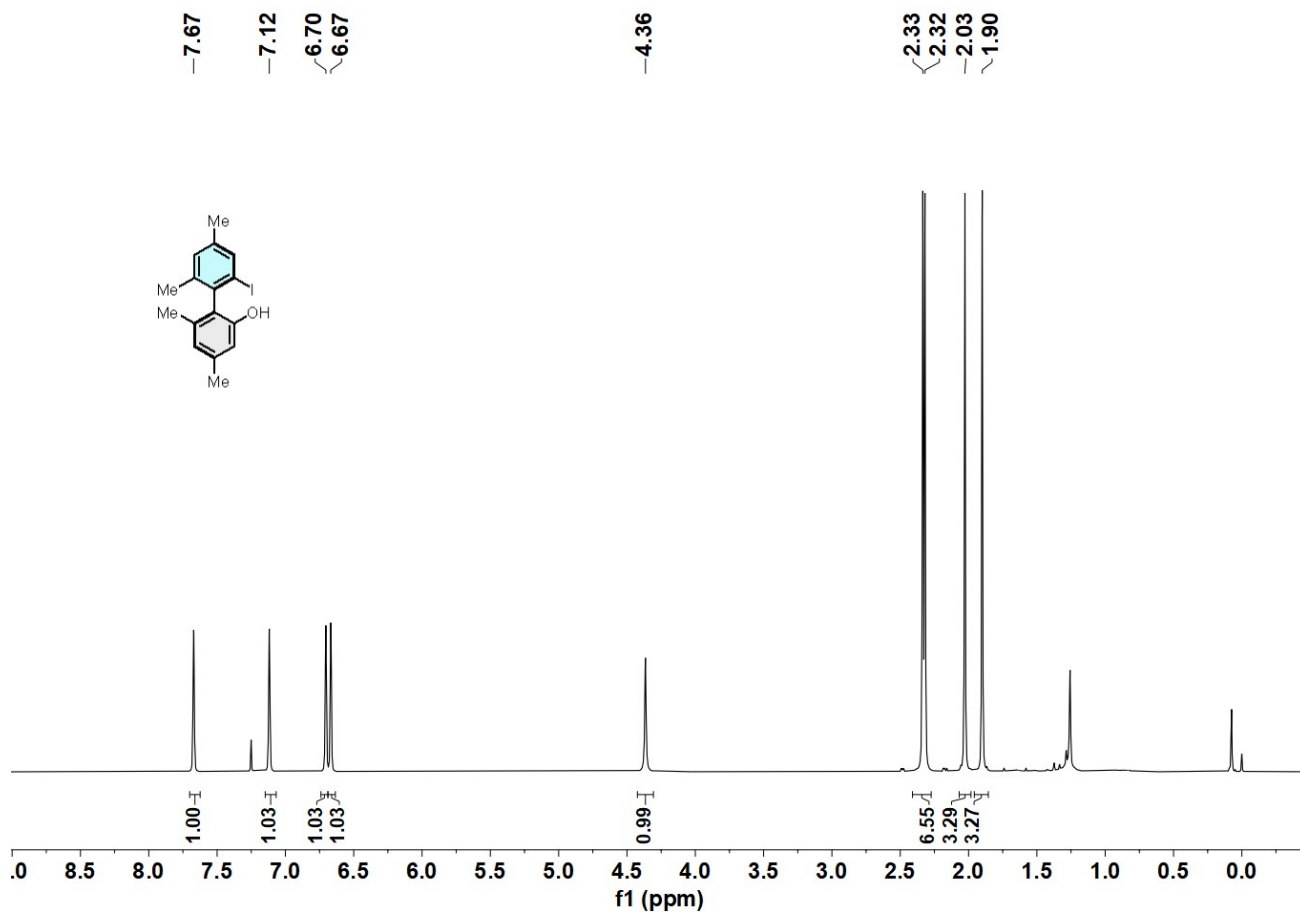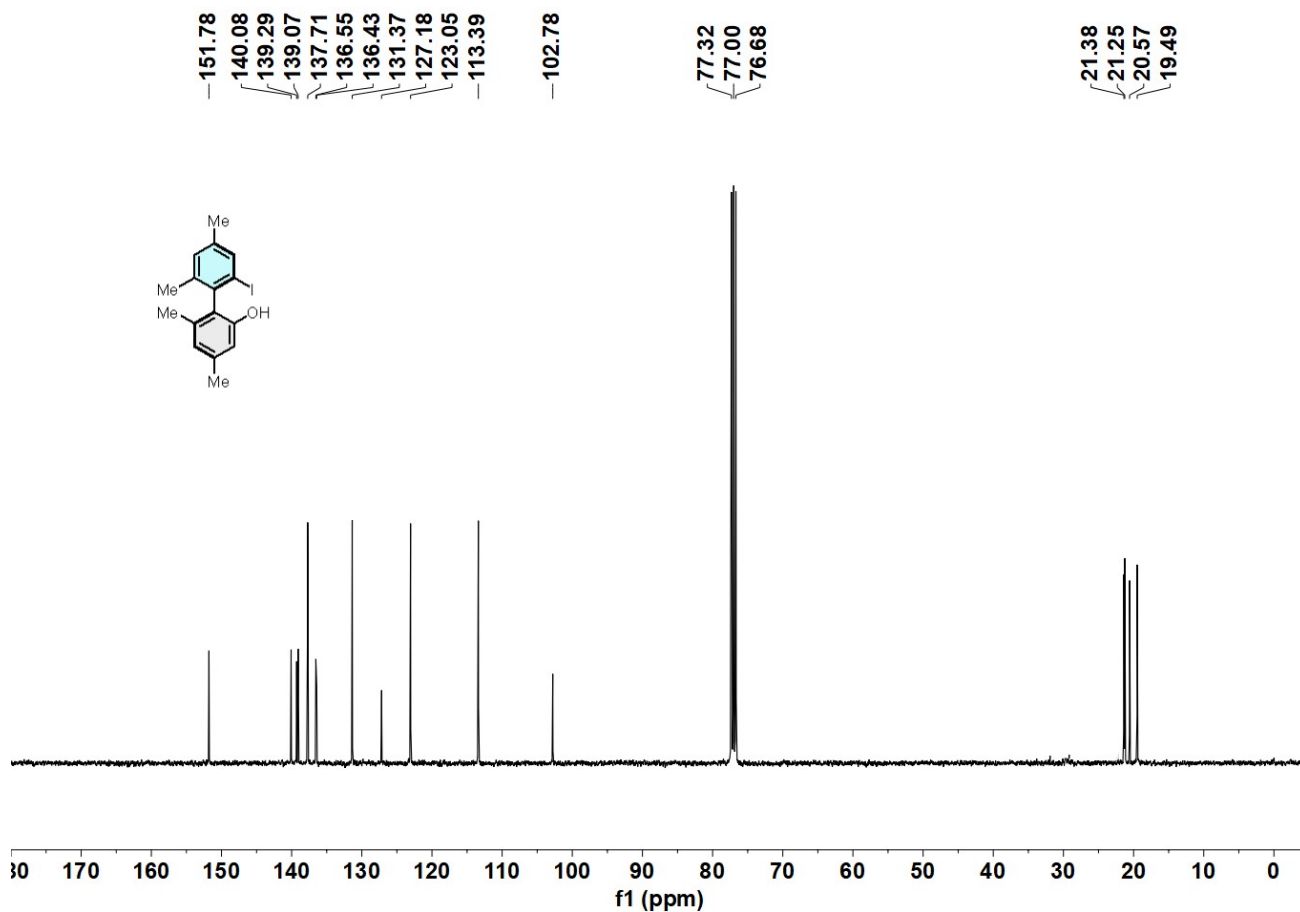

2w, <sup>1</sup>H NMR (400 MHz, CDCl<sub>3</sub>); <sup>13</sup>C NMR (101 MHz, CDCl<sub>3</sub>)

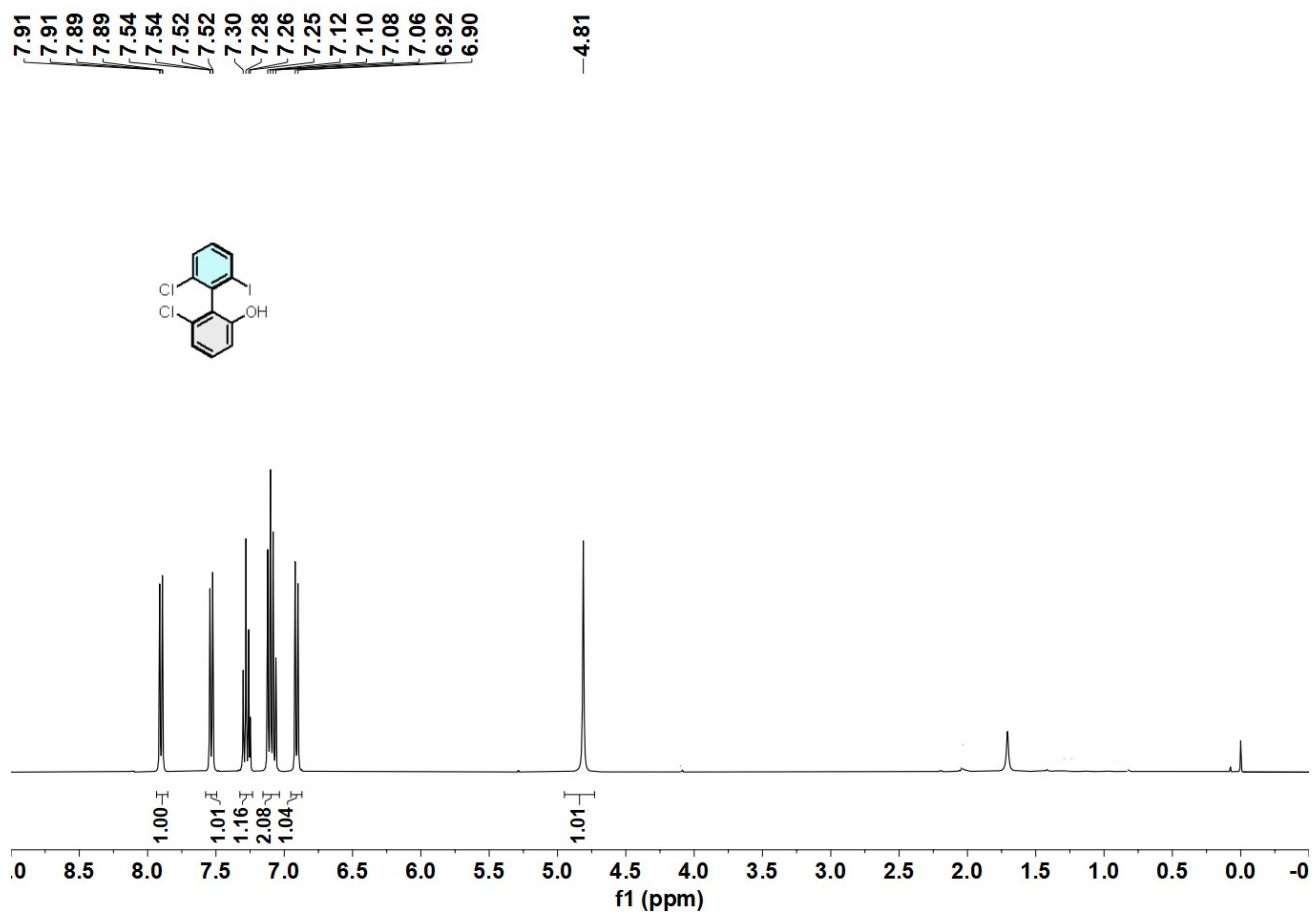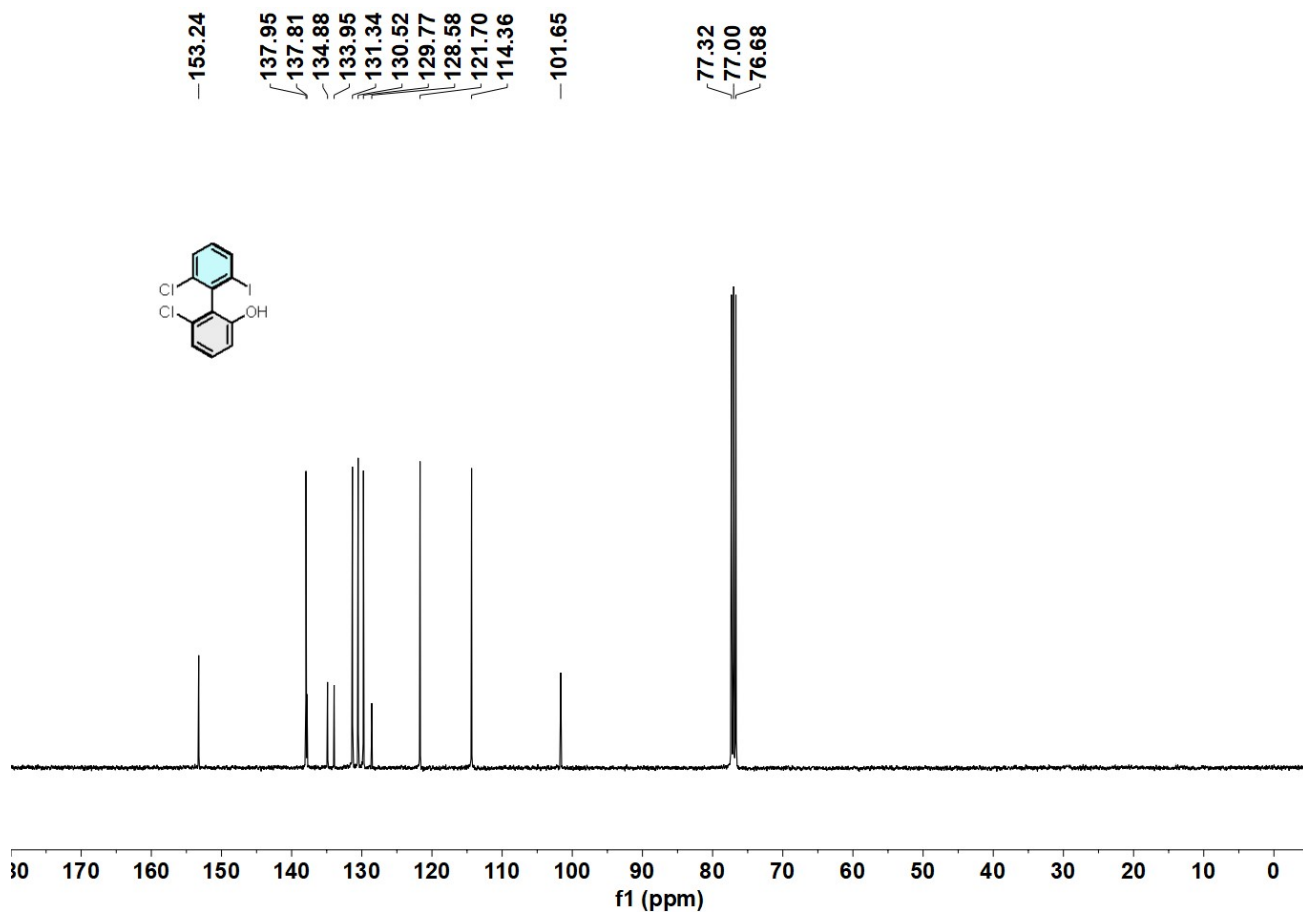

2x,  $^1\text{H}$  NMR (400 MHz,  $\text{CDCl}_3$ );  $^{13}\text{C}$  NMR (101 MHz,  $\text{CDCl}_3$ )

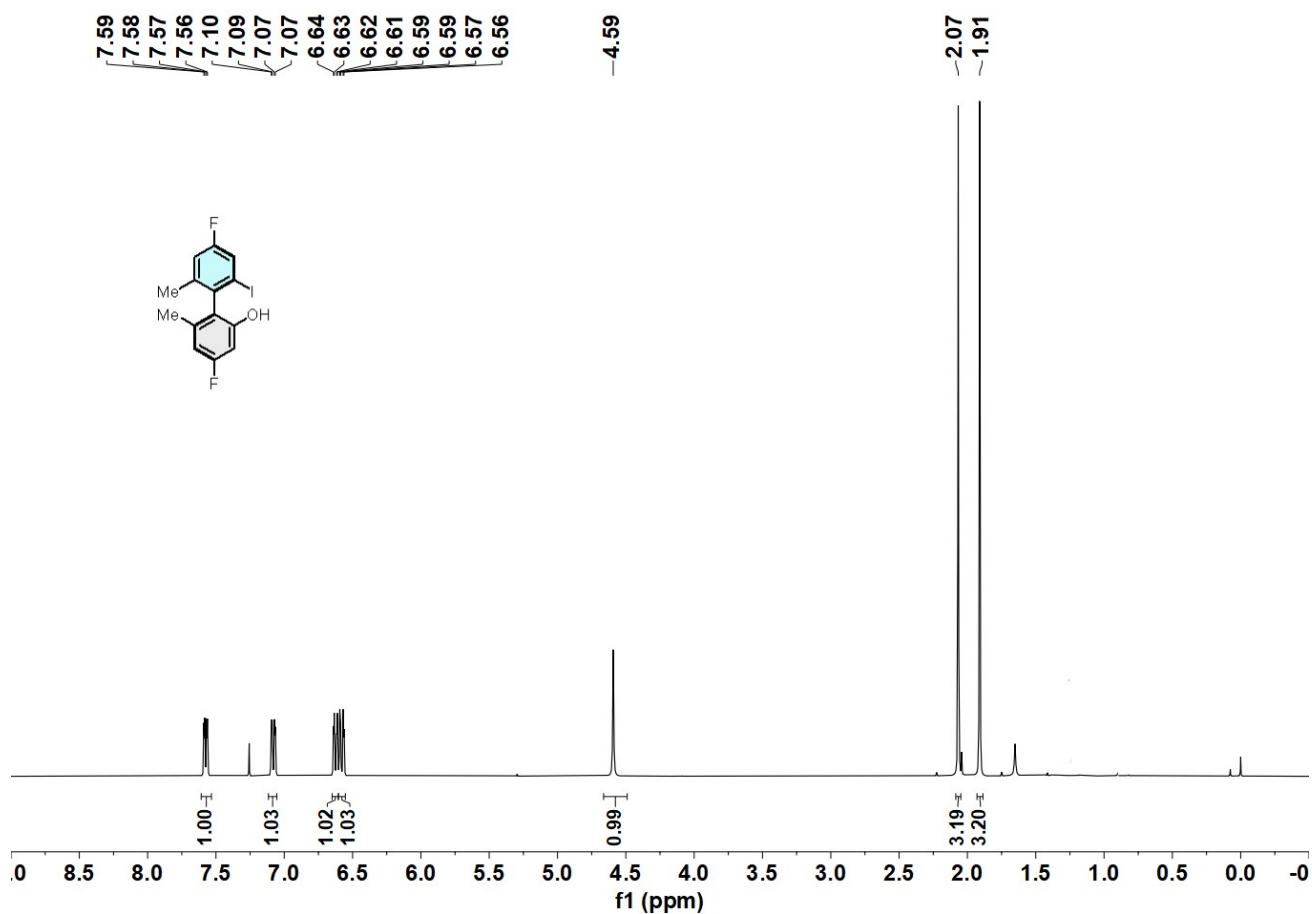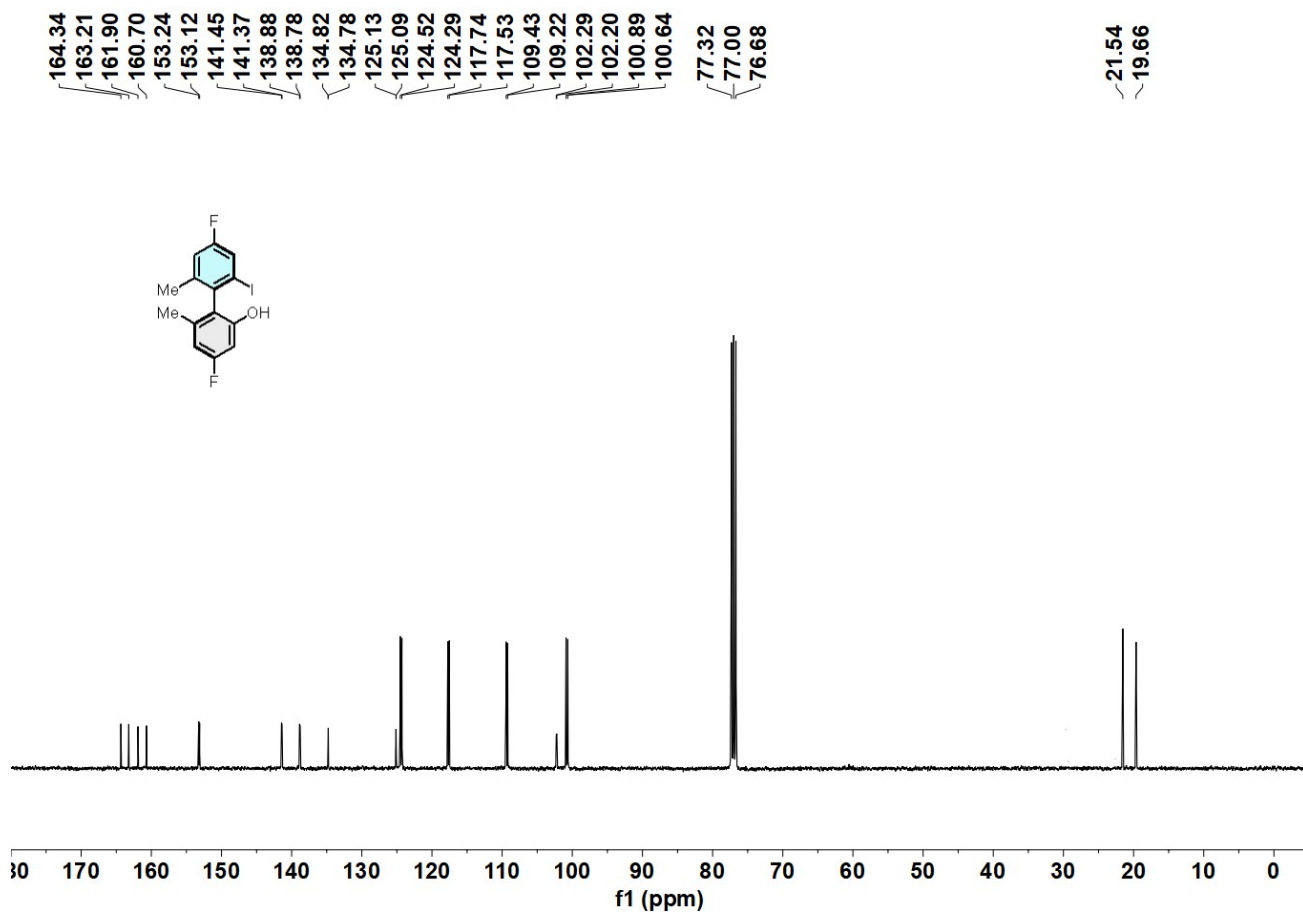

2y, <sup>1</sup>H NMR (400 MHz, CDCl<sub>3</sub>); <sup>13</sup>C NMR (101 MHz, CDCl<sub>3</sub>)

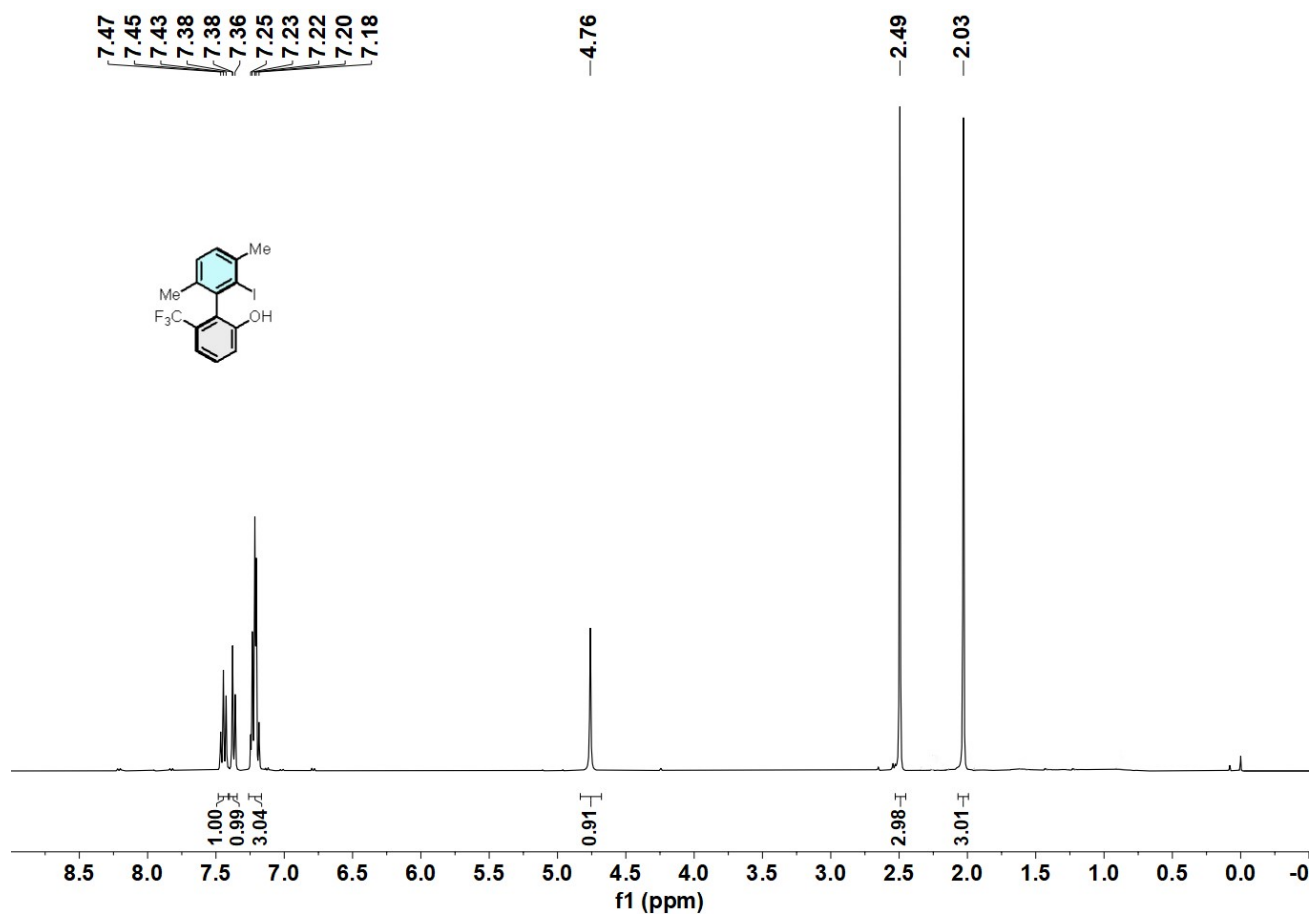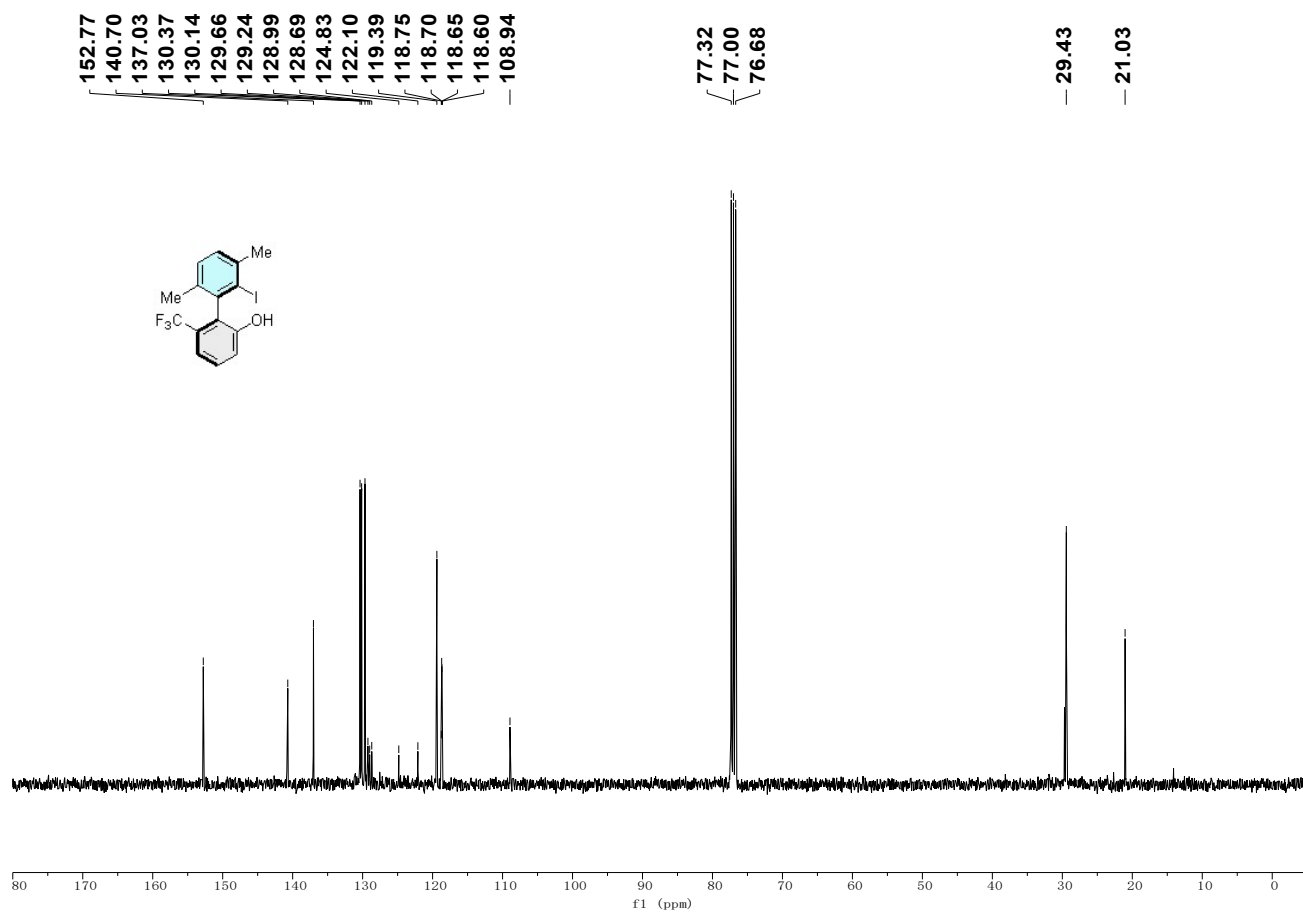

2z,  $^1\text{H}$  NMR (400 MHz,  $\text{CDCl}_3$ );  $^{13}\text{C}$  NMR (101 MHz,  $\text{CDCl}_3$ )

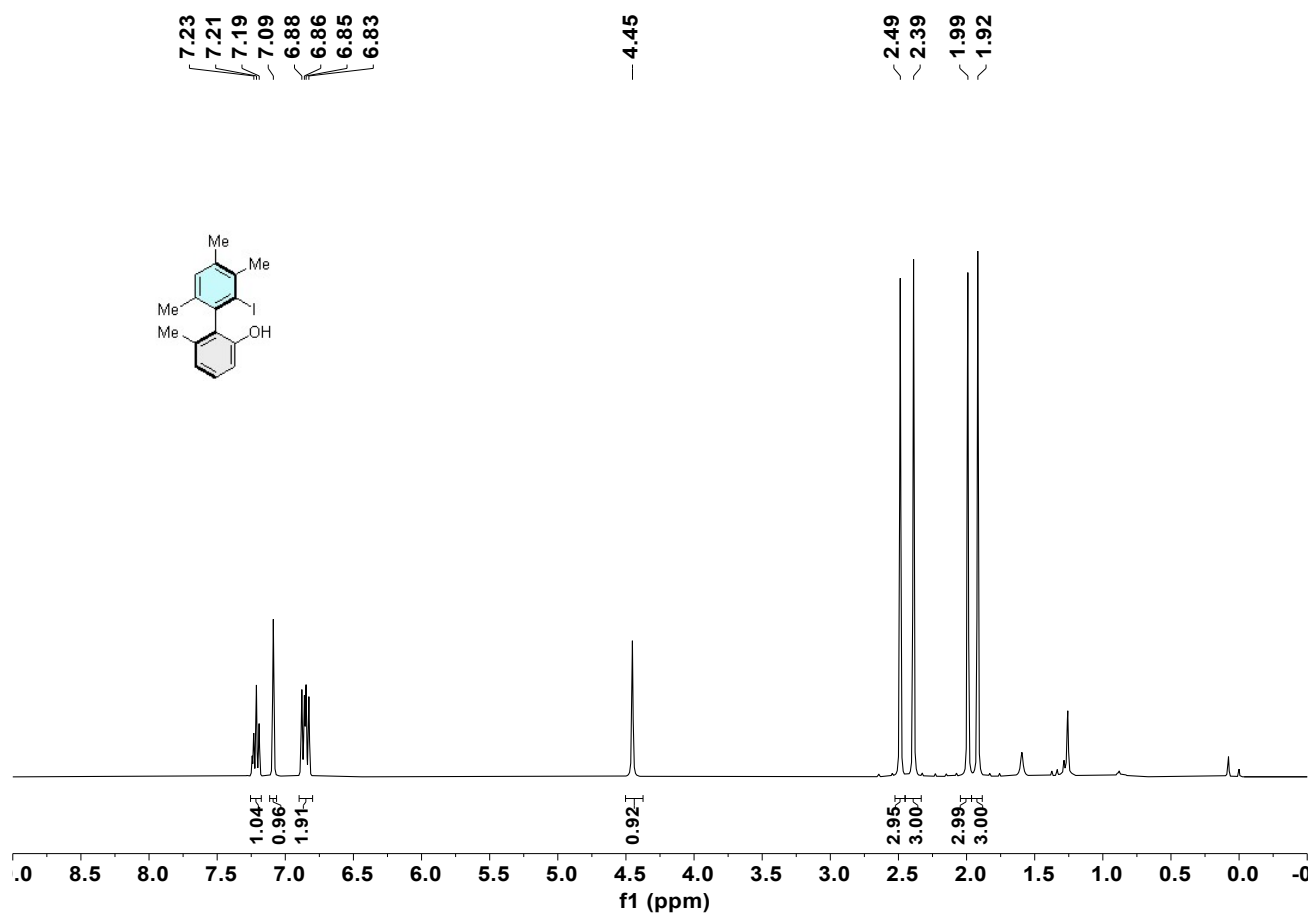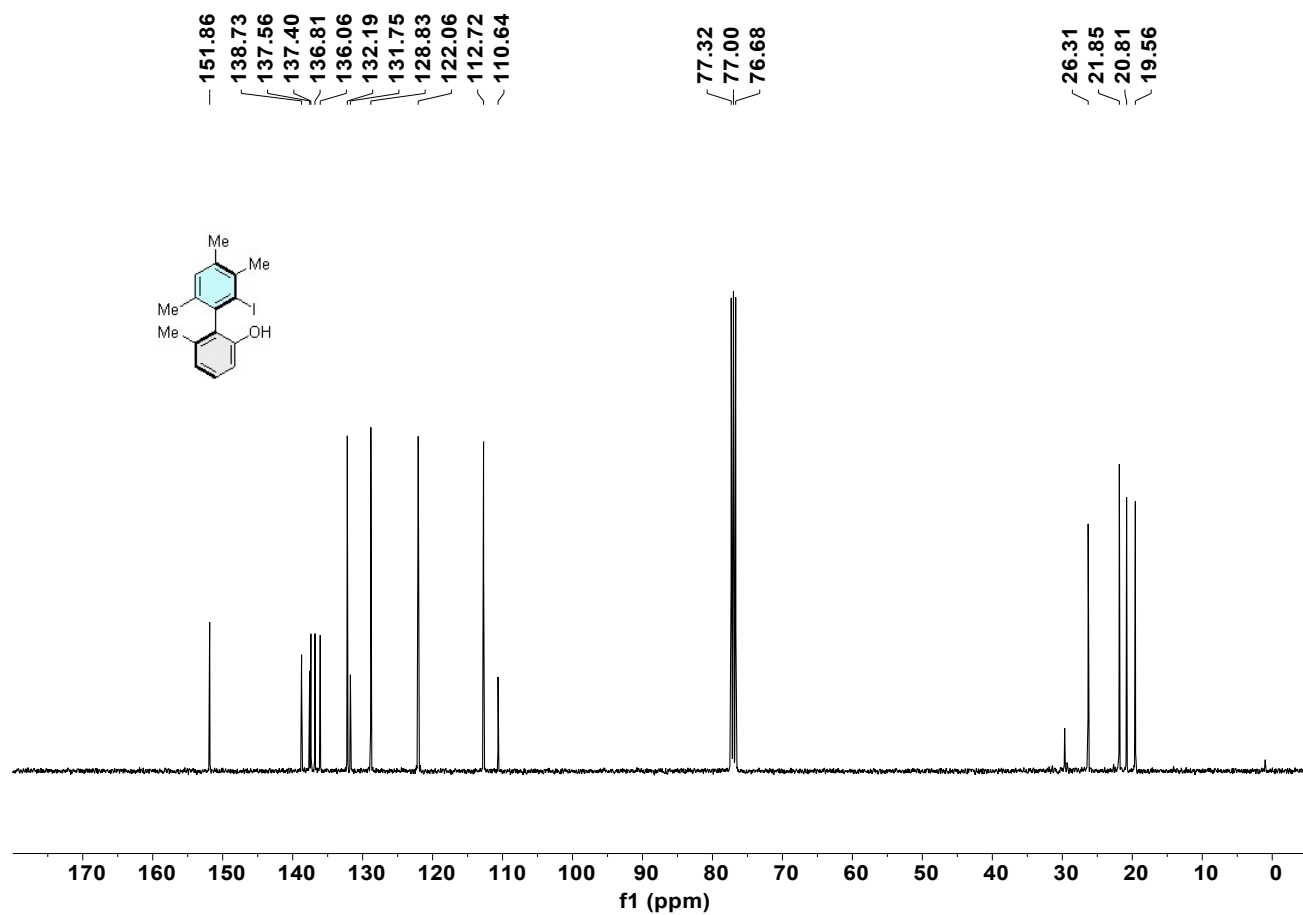

**3, <sup>1</sup>H NMR (400 MHz, CDCl<sub>3</sub>); <sup>13</sup>C NMR (101 MHz, CDCl<sub>3</sub>)**

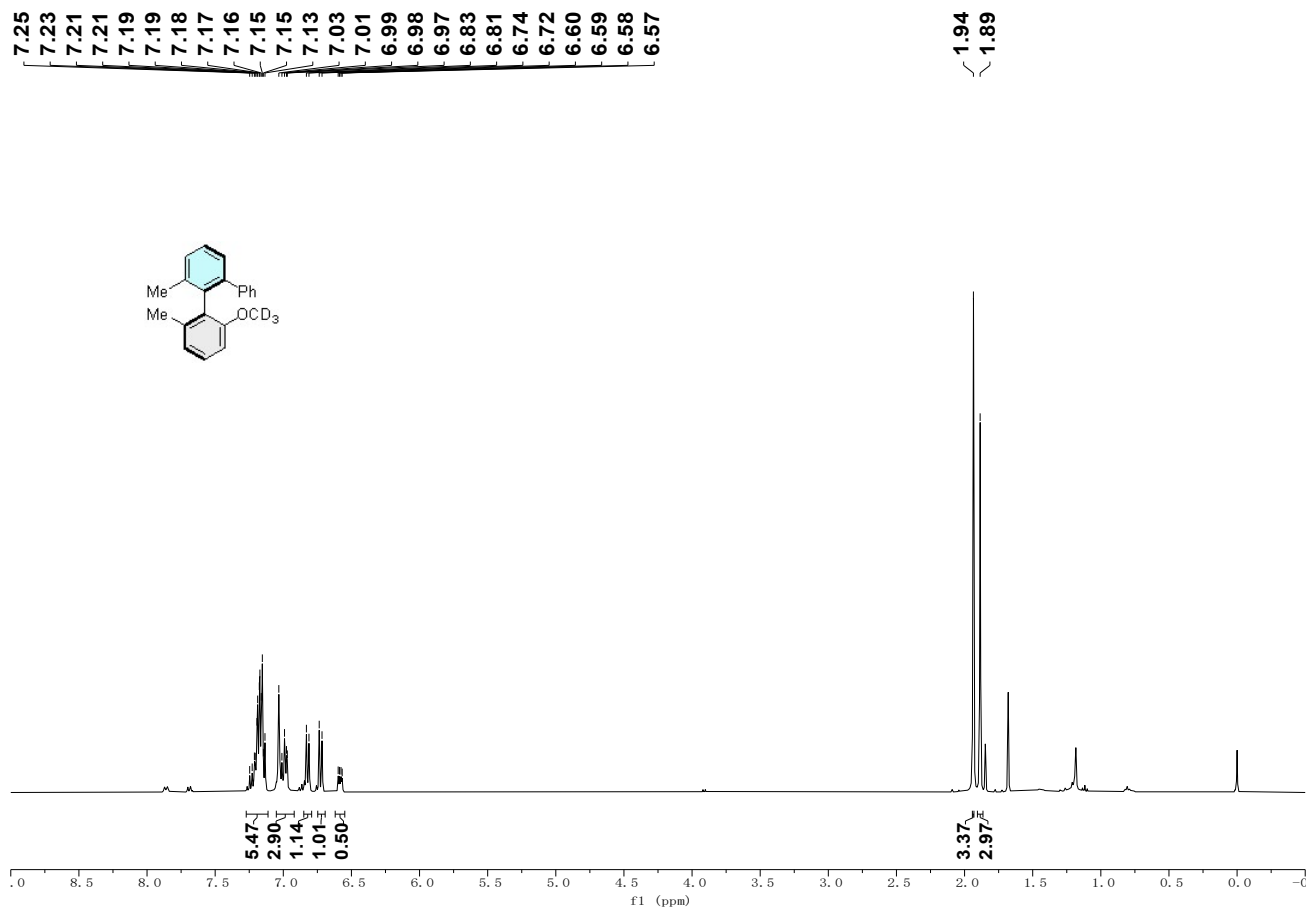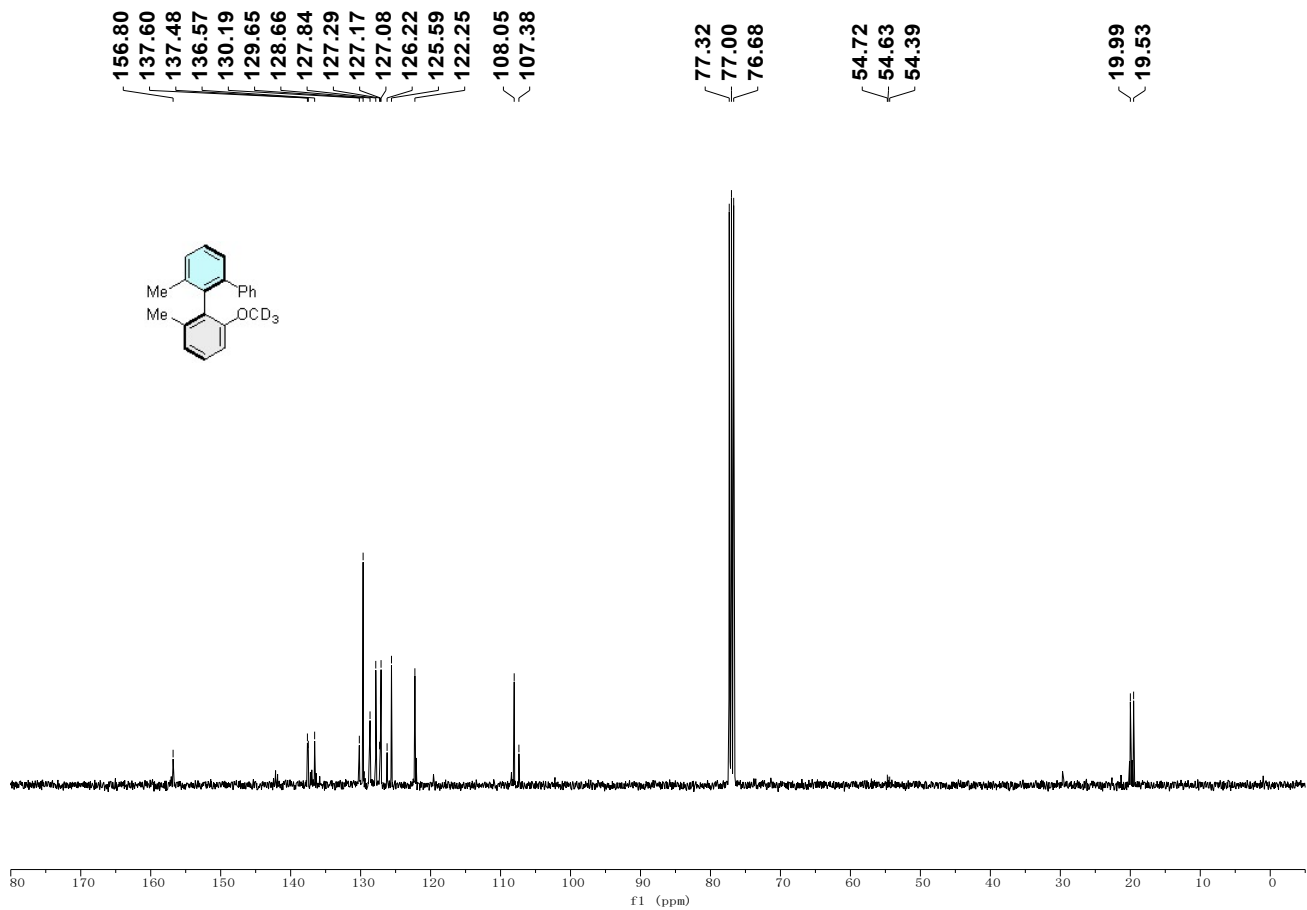

4, <sup>1</sup>H NMR (400 MHz, CDCl<sub>3</sub>); <sup>13</sup>C NMR (101 MHz, CDCl<sub>3</sub>)

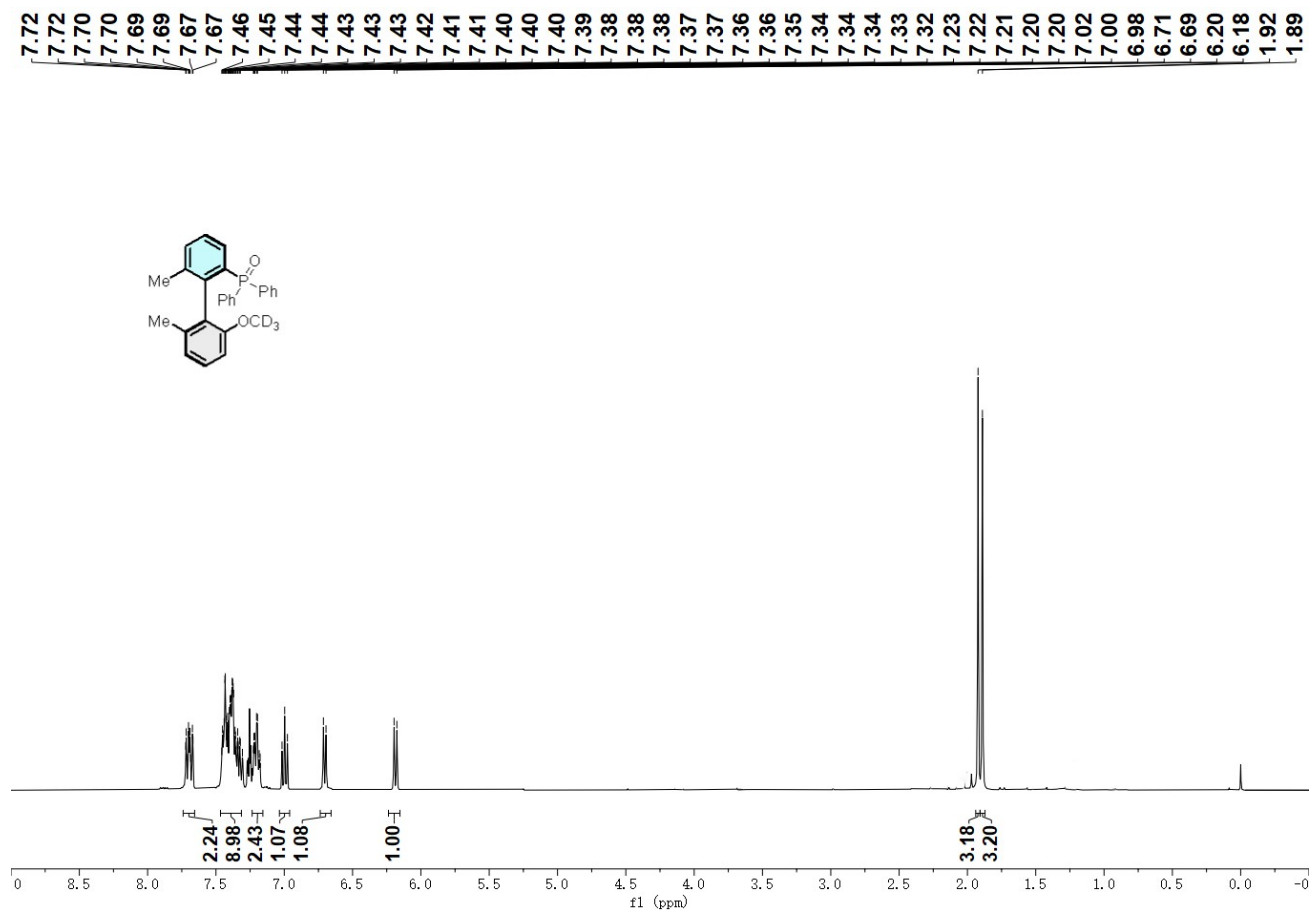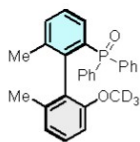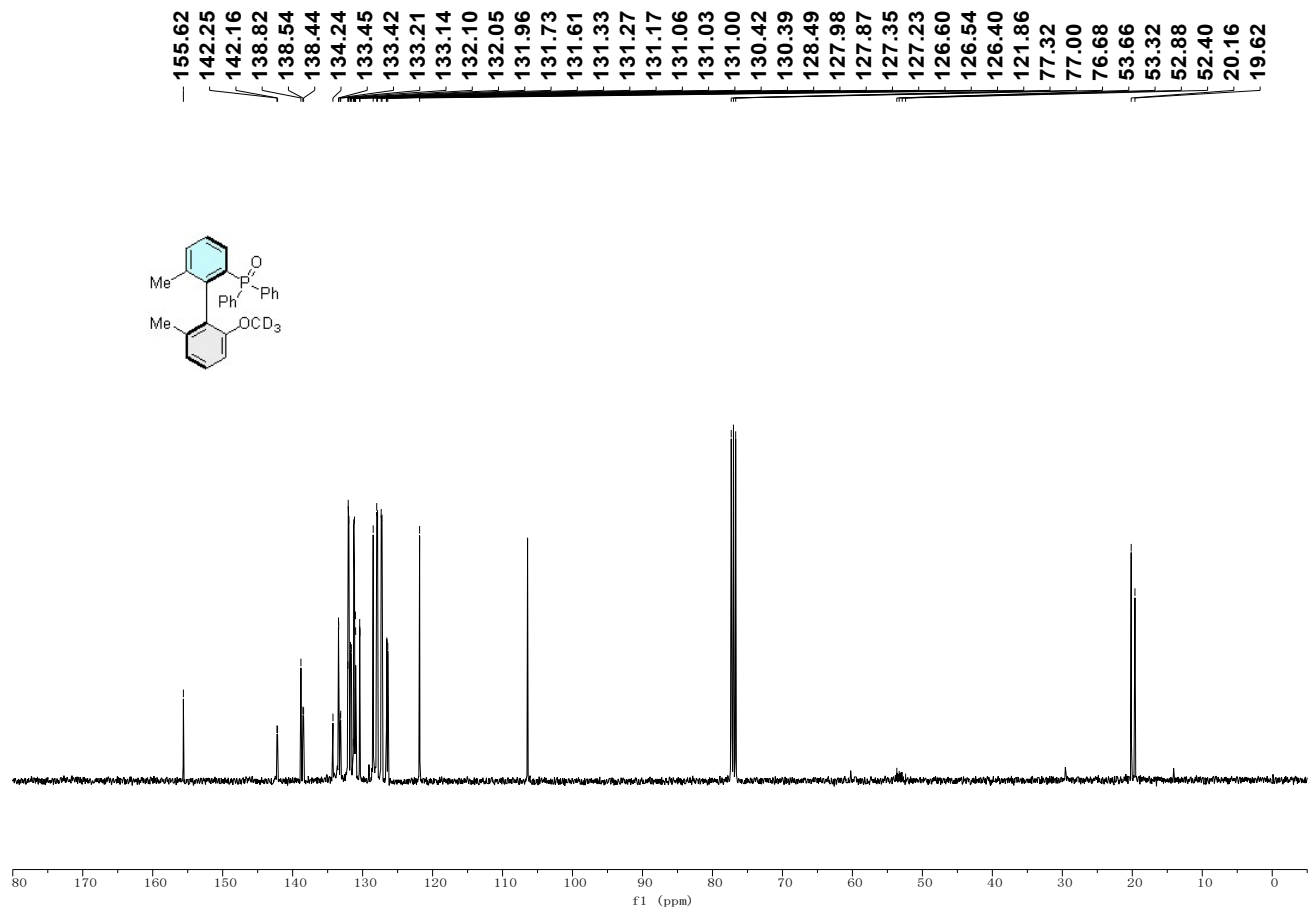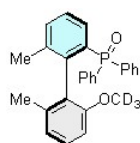

5, <sup>1</sup>H NMR (400 MHz, CDCl<sub>3</sub>); <sup>13</sup>C NMR (101 MHz, CDCl<sub>3</sub>)

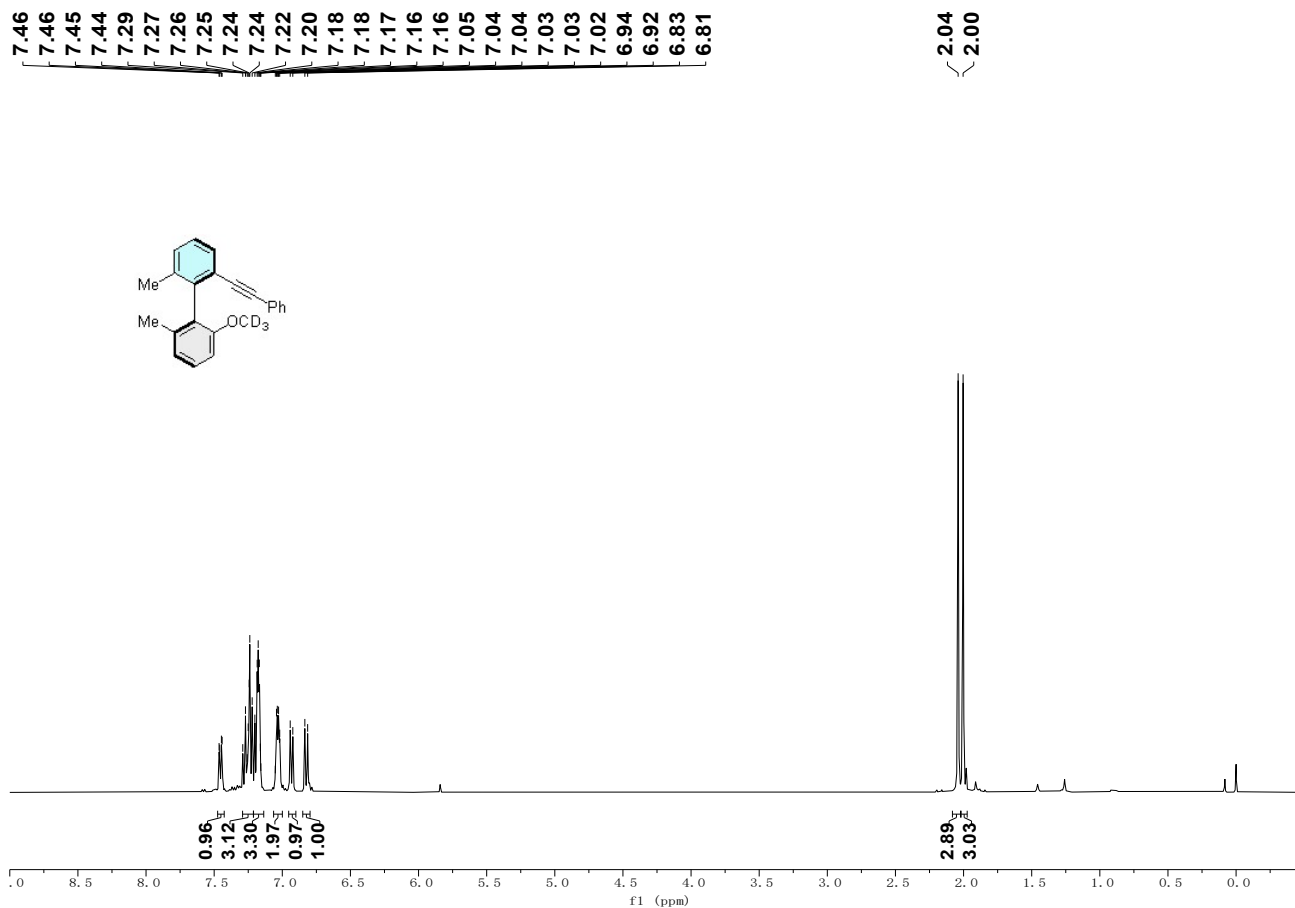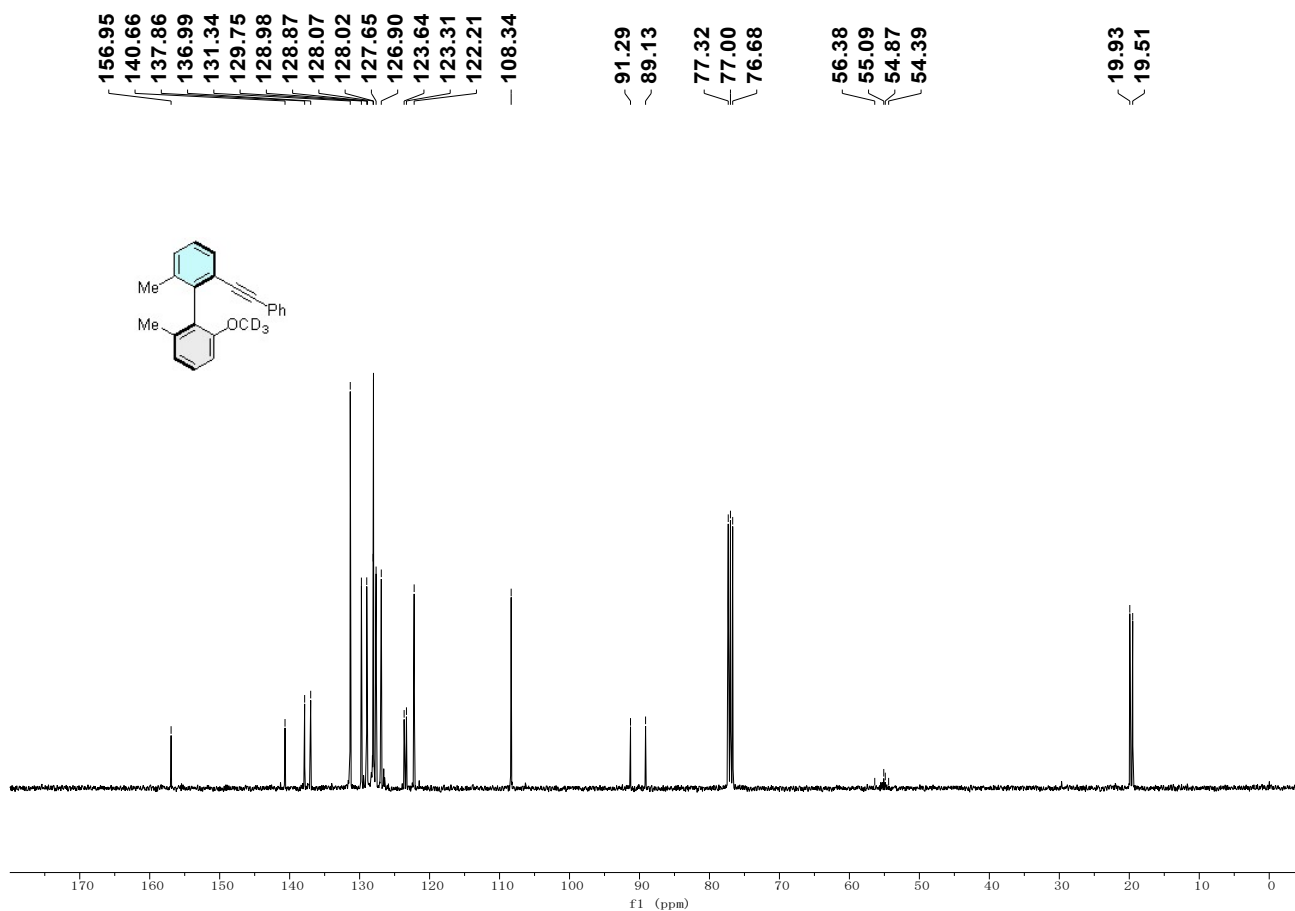

6,  $^1\text{H}$  NMR (400 MHz,  $\text{DMSO-}d_6$ );  $^{13}\text{C}$  NMR (101 MHz,  $\text{DMSO-}d_6$ )

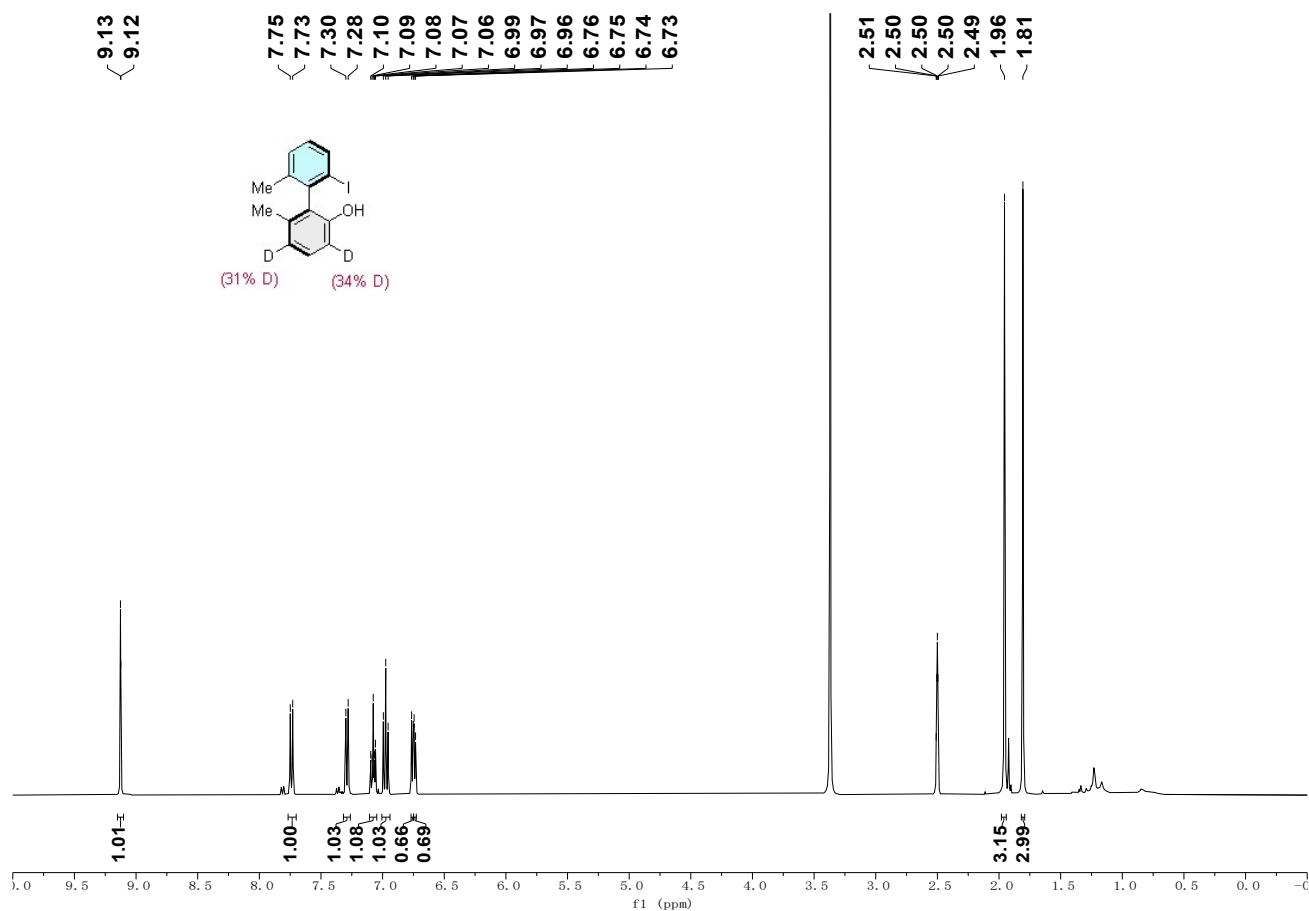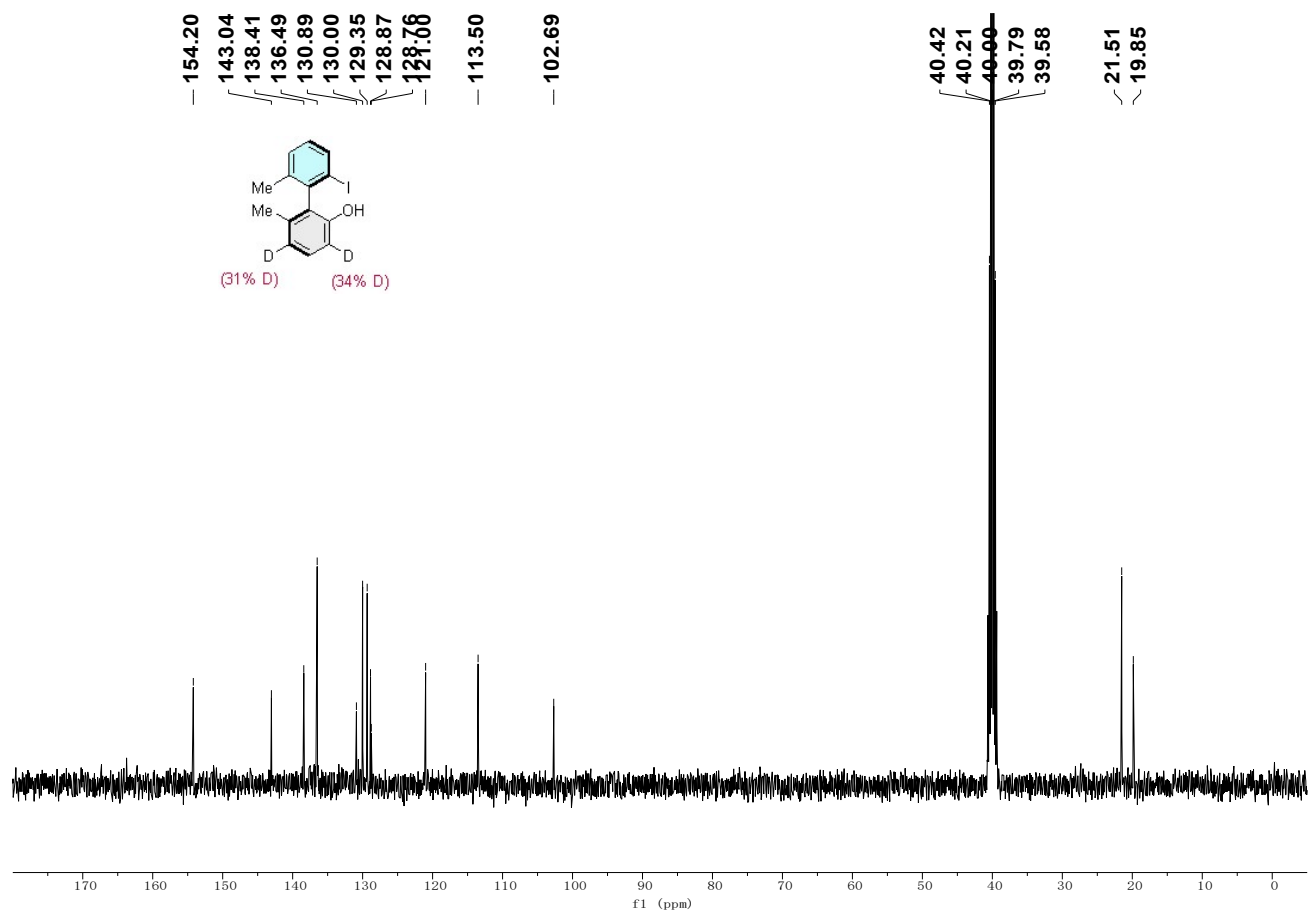

7, <sup>1</sup>H NMR (400 MHz, DMSO-d<sub>6</sub>); <sup>13</sup>C NMR (101 MHz, DMSO-d<sub>6</sub>)

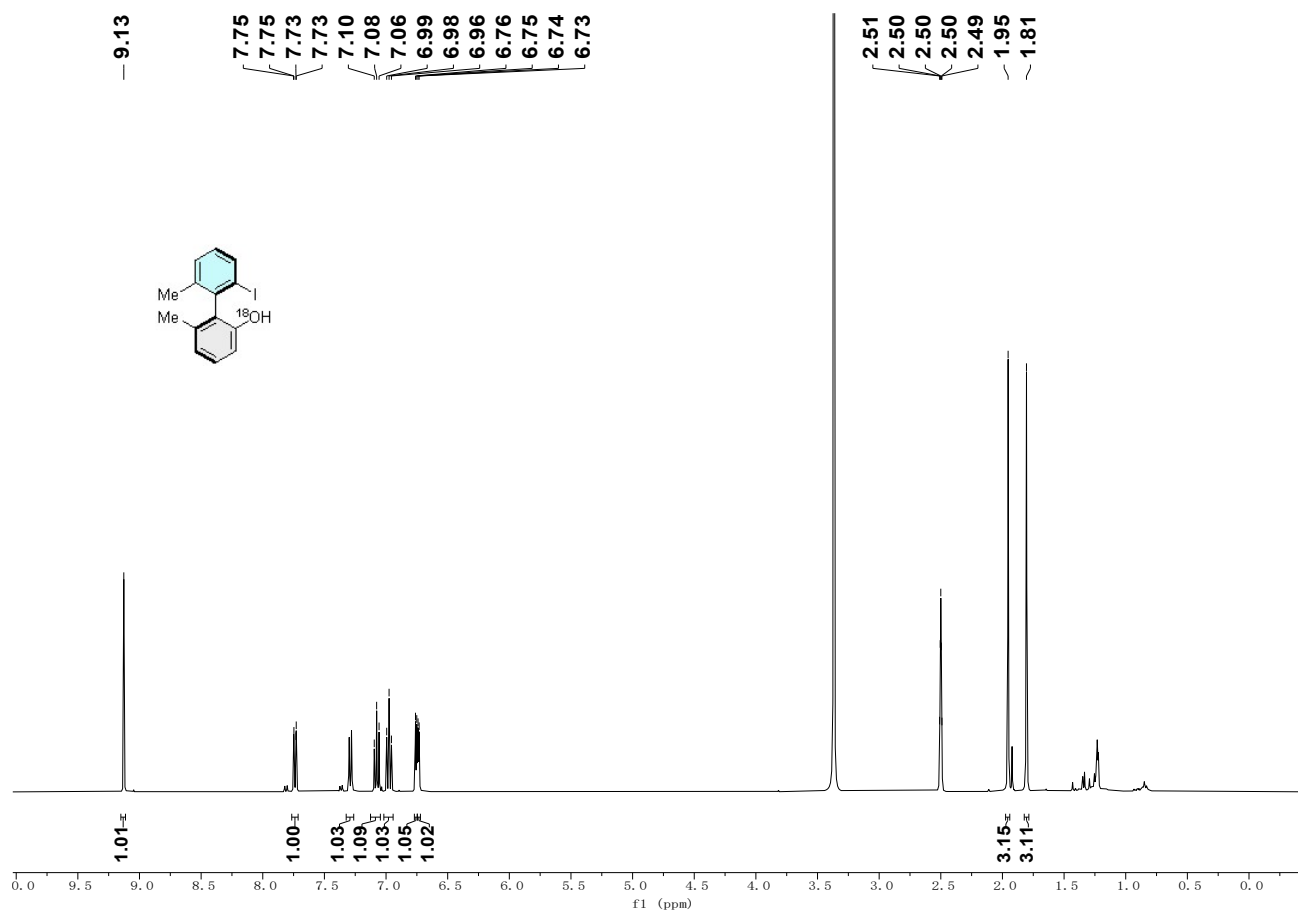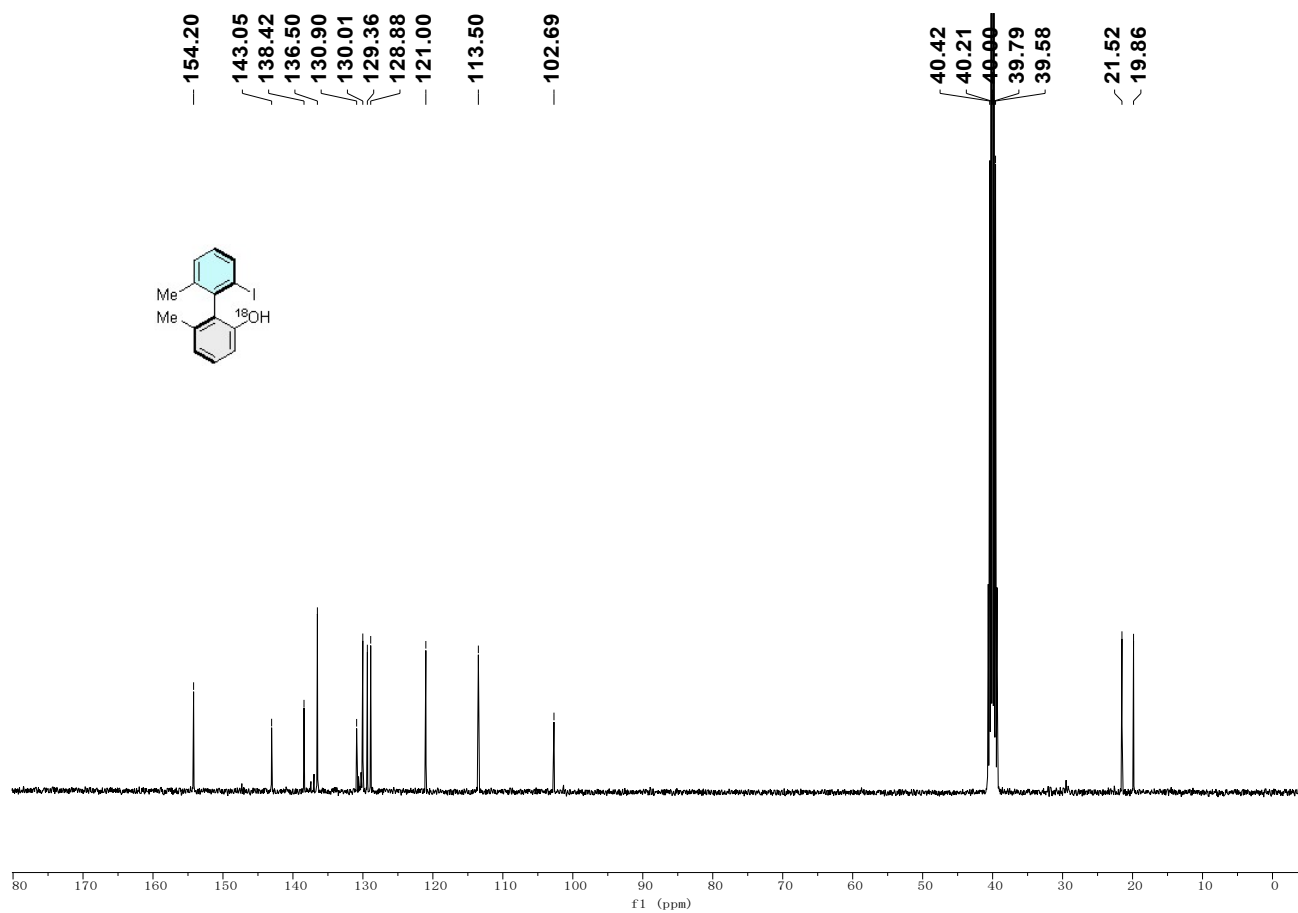

Supplement: d6qo00531d1.pdf [file d6qo00531d1.pdf]
